# Supplementary material for: Copper-catalyzed direct trifluoromethylthiolation of indoles by tert-butyl 2-((trifluoromethyl)sulfonyl)hydrazine-1-carboxylate
Source: Royal Society of Chemistry journal article supplement (doi:10.1039/c8qo00779a), 2018-01-01

*Supporting Information for*

**Copper Catalyzed Direct Trifluoromethylthiolation  
of Indoles by tert-Butyl 2-  
((trifluoromethyl)sulfonyl)hydrazine-1-carboxylate**

Kui Lu,<sup>a,\*</sup> Quan Li,<sup>a</sup> Xiaolan Xi,<sup>a</sup> Yuna Huang,<sup>a</sup> Zhi Gong,<sup>a</sup> Peng Yu,<sup>a</sup> and Xia Zhao<sup>b,\*</sup>

<sup>a</sup> *China International Science and Technology Cooperation Base of Food Nutrition/Safety and Medicinal Chemistry, Tianjin International Cooperation Research Centre of Food Nutrition/Safety and Medicinal Chemistry, College of Biotechnology, Tianjin University of Science & Technology, Tianjin, China, 300457*

<sup>b</sup> *College of Chemistry, Tianjin Key Laboratory of Structure and Performance for Functional Molecules, Key laboratory of Inorganic-organic Hybrid Functional Material Chemistry, Ministry of Education, Tianjin Normal University, Tianjin, China, 300387*

[lukui@tust.edu.cn](mailto:lukui@tust.edu.cn)

[hxxyzhx@mail.tjnu.edu.cn](mailto:hxxyzhx@mail.tjnu.edu.cn)

| <b>Contents</b>                                | <b>Page</b> |
|------------------------------------------------|-------------|
| General information                            | 2           |
| Characteristic data for compound <b>3a-3z</b>  | 2-8         |
| Experiments for the mechanistic study          | 8-22        |
| References                                     | 22          |
| <sup>1</sup> H and <sup>13</sup> C NMR Spectra | 22-55       |

**1) General information**

All solvents were distilled prior to use. For chromatography, 200-300 mesh silica gel (Qingdao, China) was employed.  $^1\text{H}$  and  $^{13}\text{C}$  NMR spectra were recorded at 400 MHz and 100 MHz with Bruker ARX 400 spectrometer. Chemical shifts are reported in ppm using tetramethylsilane as internal standard. Mass spectra were obtained on a Bruker SCION 436-GC SQ mass spectrometer or on a Bruker Apex IV FTMS spectrometer.

## 2) Characteristic data for 3a-3z

### 3-((trifluoromethyl)thio)-1*H*-indole (3a).<sup>1</sup>

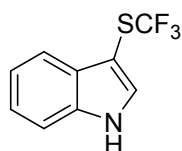

White solid (72 mg, 66%). Eluent: ethyl acetate/petroleum ether = 1/10.  $^1\text{H}$  NMR (400 MHz,  $\text{CDCl}_3$ )  $\delta$  8.47 (s, 1H), 7.84-7.82 (m, 1H), 7.53 (d,  $J = 2.4$  Hz, 1H), 7.44-7.42 (m, 1H), 7.33-7.28 (m, 2H);  $^{13}\text{C}$  NMR (100 MHz,  $\text{CDCl}_3$ )  $\delta$  136.1, 132.9, 129.6, 129.6 (q,  $J = 307$  Hz, 1C), 123.5, 121.7, 119.4, 111.8, 95.6 (q,  $J = 2.0$  Hz, 1C);  $^{19}\text{F}$  NMR (376 MHz,  $\text{CDCl}_3$ )  $\delta$  -44.46.

### 4-methyl-3-((trifluoromethyl)thio)-1*H*-indole (3b).<sup>1</sup>

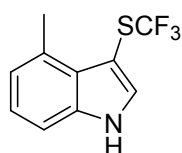

White solid (69 mg, 60%). Eluent: ethyl acetate/petroleum ether = 1/10.  $^1\text{H}$  NMR (400 MHz,  $\text{CDCl}_3$ )  $\delta$  8.46 (s, 1H), 7.52 (d,  $J = 2.0$  Hz, 1H), 7.27 (d,  $J = 8.0$  Hz, 1H), 7.19 (t,  $J = 7.6$  Hz, 1H), 7.01 (d,  $J = 6.8$  Hz, 1H), 2.86 (s, 3H);  $^{13}\text{C}$  NMR (100 MHz,  $\text{CDCl}_3$ )  $\delta$  136.5, 134.1, 131.8, 129.3 (q,  $J = 307$  Hz, 1C), 126.9, 123.6, 123.5, 109.8, 95.2 (q,  $J = 3.0$  Hz, 1C), 19.5;  $^{19}\text{F}$  NMR (376 MHz,  $\text{CDCl}_3$ )  $\delta$  -45.83.

### 3-((trifluoromethyl)thio)-1*H*-indol-4-ol (3c).<sup>1</sup>

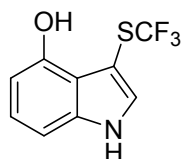

White solid (56 mg, 48%). Eluent: ethyl acetate/petroleum ether = 1/10.  $^1\text{H}$  NMR (400 MHz,

CDCl<sub>3</sub>)  $\delta$  8.62 (s, 1H), 7.44 (s, 1H), 7.18 (t,  $J = 8.0$  Hz, 1H), 7.00 (d,  $J = 8.0$  Hz, 1H), 6.74 (s, 1H), 6.72 (d,  $J = 8.0$  Hz, 1H); <sup>13</sup>C NMR (100 MHz, CDCl<sub>3</sub>)  $\delta$  150.6, 137.8, 132.9, 128.4 (q,  $J = 309$  Hz, 1C), 125.2, 116.6, 107.2, 104.6, 91.5; <sup>19</sup>F NMR (376 MHz, CDCl<sub>3</sub>)  $\delta$  -45.73.

**4-methoxy-3-((trifluoromethyl)thio)-1H-indole (3d).**<sup>1</sup>

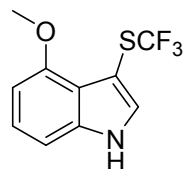

White solid (64 mg, 52%). Eluent: ethyl acetate/petroleum ether = 1/10. <sup>1</sup>H NMR (400 MHz, CDCl<sub>3</sub>)  $\delta$  8.46 (s, 1H), 7.36 (d,  $J = 2.0$  Hz, 1H), 7.22 (t,  $J = 8.0$  Hz, 1H), 7.00 (d,  $J = 8.0$  Hz, 1H), 6.68 (d,  $J = 7.6$  Hz, 1H), 3.99 (s, 3H); <sup>13</sup>C NMR (100 MHz, CDCl<sub>3</sub>)  $\delta$  154.6, 138.0, 132.6, 129.6 (q,  $J = 308$  Hz, 1C), 124.4, 118.6, 105.0, 102.2, 94.4 (q,  $J = 3.0$  Hz, 1C), 55.6; <sup>19</sup>F NMR (376 MHz, CDCl<sub>3</sub>)  $\delta$  -45.39.

**5-methyl-3-((trifluoromethyl)thio)-1H-indole (3e).**<sup>1</sup>

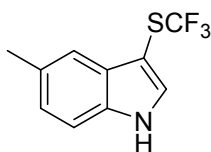

White solid (54 mg, 47%). Eluent: ethyl acetate/petroleum ether = 1/10. <sup>1</sup>H NMR (400 MHz, CDCl<sub>3</sub>)  $\delta$  8.39 (s, 1H), 7.60 (s, 1H), 7.49 (d,  $J = 2.8$  Hz, 1H), 7.31 (d,  $J = 8.4$  Hz, 1H), 7.13 (d,  $J = 8.4$  Hz, 1H), 2.51 (s, 3H); <sup>13</sup>C NMR (100 MHz, CDCl<sub>3</sub>)  $\delta$  134.4, 133.0, 131.3, 130.0, 129.6 (q,  $J = 308$  Hz, 1C), 125.2, 119.0, 111.5, 95.0 (q,  $J = 2.0$  Hz, 1C), 21.6; <sup>19</sup>F NMR (376 MHz, CDCl<sub>3</sub>)  $\delta$  -44.58.

**2,5-Dimethyl-3-((trifluoromethyl)thio)-1H-indole (3f).**<sup>2</sup>

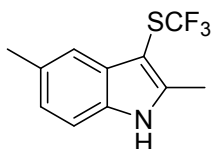

White solid (50 mg, 43%). Eluent: ethyl acetate/petroleum ether = 1/10. <sup>1</sup>H NMR (400 MHz, CDCl<sub>3</sub>)  $\delta$  8.17 (s, 1H), 7.51 (s, 1H), 7.20 (d,  $J = 8.0$  Hz, 1H), 7.06 (d,  $J = 8.0$  Hz, 1H), 2.55 (s, 1H), 2.50 (s, 3H); <sup>13</sup>C NMR (100 MHz, CDCl<sub>3</sub>)  $\delta$  143.7, 133.4, 131.0, 130.9, 129.9 (q,  $J = 309$  Hz, 1C),

124.2, 118.5, 110.6, 92.0, 21.6, 12.2;  $^{19}\text{F}$  NMR (376 MHz,  $\text{CDCl}_3$ )  $\delta$  -44.45.

**5-Methoxy-3-((trifluoromethyl)thio)-1H-indole (3g).**<sup>3</sup>

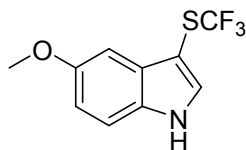

White solid (67 mg, 54%). Eluent: ethyl acetate/petroleum ether = 1/10.  $^1\text{H}$  NMR (400 MHz,  $\text{CDCl}_3$ )  $\delta$  8.46 (s, 1H), 7.45 (d,  $J$  = 2.8 Hz, 1H), 7.26 (d,  $J$  = 8.8 Hz, 1H), 7.23 (s, 1H), 6.68 (dd,  $J$  = 8.8 Hz, 2.0 Hz, 1H), 3.89 (s, 3H);  $^{13}\text{C}$  NMR (100 MHz,  $\text{CDCl}_3$ )  $\delta$  155.7, 133.4, 131.1, 130.4, 129.7 (q,  $J$  = 308 Hz, 1C), 114.1, 112.7, 100.7, 95.1 (q,  $J$  = 3.0 Hz, 1C), 56.0;  $^{19}\text{F}$  NMR (376 MHz,  $\text{CDCl}_3$ )  $\delta$  -44.61.

**5-chloro-3-((trifluoromethyl)thio)-1H-indole (3h).**<sup>1</sup>

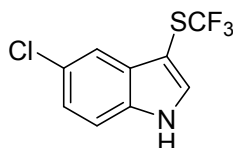

White solid (78 mg, 62%). Eluent: ethyl acetate/petroleum ether = 1/10.  $^1\text{H}$  NMR (400 MHz,  $\text{CDCl}_3$ )  $\delta$  8.48 (s, 1H), 7.75 (s, 1H), 7.50 (d,  $J$  = 2.4 Hz, 1H), 7.29 (d,  $J$  = 8.8 Hz, 1H), 6.68 (d,  $J$  = 8.4 Hz, 1H);  $^{13}\text{C}$  NMR (100 MHz,  $\text{CDCl}_3$ )  $\delta$  134.5, 134.1, 130.8, 129.4 (q,  $J$  = 308 Hz, 1C), 127.8, 124.1, 119.0, 112.9, 95.6 (q,  $J$  = 3.0 Hz, 1C);  $^{19}\text{F}$  NMR (376 MHz,  $\text{CDCl}_3$ )  $\delta$  -44.46.

**5-bromo-3-((trifluoromethyl)thio)-1H-indole (3i).**<sup>1</sup>

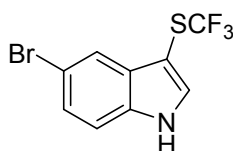

White solid (90 mg, 61%). Eluent: ethyl acetate/petroleum ether = 1/10.  $^1\text{H}$  NMR (400 MHz,  $\text{CDCl}_3$ )  $\delta$  8.57 (s, 1H), 7.93 (s, 1H), 7.53 (s, 1H), 7.38 (d,  $J$  = 8.4 Hz, 1H), 7.28 (d,  $J$  = 8.4 Hz, 1H);  $^{13}\text{C}$  NMR (100 MHz,  $\text{CDCl}_3$ )  $\delta$  134.8, 133.9, 131.3, 129.4 (q,  $J$  = 308 Hz, 1C), 126.7, 122.1, 115.3, 113.3, 95.5 (q,  $J$  = 2.0 Hz, 1C);  $^{19}\text{F}$  NMR (376 MHz,  $\text{CDCl}_3$ )  $\delta$  -44.45.

**Methyl 3-((trifluoromethyl)thio)-1H-indole-5-carboxylate (3j).**<sup>1</sup>

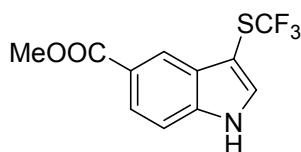

White solid (77 mg, 56%). Eluent: ethyl acetate/petroleum ether = 1/10.  $^1\text{H}$  NMR (400 MHz,  $\text{CDCl}_3$ )  $\delta$  8.75 (s, 1H), 8.55 (s, 1H), 8.02 (d,  $J$  = 8.4 Hz, 1H), 7.63 (d,  $J$  = 2.8 Hz, 1H), 7.46 (d,

$J = 8.4$  Hz, 1H), 3.97 (s, 1H);  $^{13}\text{C}$  NMR (100 MHz, DMSO- $d_6$ )  $\delta$  166.8, 139.1, 137.1, 129.3 (q,  $J = 308$  Hz, 1C), 128.7, 123.4, 122.6, 120.2, 112.8, 92.9 (q,  $J = 2$  Hz, 1C), 51.9;  $^{19}\text{F}$  NMR (376 MHz,  $\text{CDCl}_3$ )  $\delta$  -44.39.

**5-fluoro-3-((trifluoromethyl)thio)-1H-indole (3k).<sup>1</sup>**

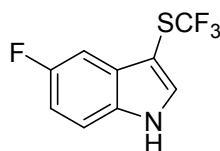

White solid (72 mg, 61%). Eluent: ethyl acetate/petroleum ether = 1/10.  $^1\text{H}$  NMR (400 MHz,  $\text{CDCl}_3$ )  $\delta$  8.53 (s, 1H), 7.57 (d,  $J = 2.8$  Hz, 1H), 7.46 (dd,  $J = 8.8$  Hz, 2.4 Hz, 1H), 7.35 (dd,  $J = 8.8$  Hz, 4.4 Hz, 1H), 7.28 (td,  $J = 9.0$  Hz, 2.4 Hz, 1H);  $^{13}\text{C}$  NMR (100 MHz,  $\text{CDCl}_3$ )  $\delta$  159.2 (d,  $J = 236$  Hz, 1C), 134.5, 132.6, 130.5 (d,  $J = 11$  Hz, 1C), 129.5 (q,  $J = 308$  Hz, 1C), 112.8 (d,  $J = 9$  Hz, 1C), 112.3 (d,  $J = 26$  Hz, 1C), 104.7 (d,  $J = 25$  Hz, 1C), 95.9 (q,  $J = 2.0$  Hz, 1C);  $^{19}\text{F}$  NMR (376 MHz,  $\text{CDCl}_3$ )  $\delta$  -44.58, -121.60.

**6-fluoro-3-((trifluoromethyl)thio)-1H-indole (3l).<sup>1</sup>**

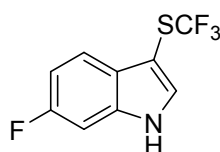

White solid (75 mg, 64%). Eluent: ethyl acetate/petroleum ether = 1/10.  $^1\text{H}$  NMR (400 MHz,  $\text{CDCl}_3$ )  $\delta$  8.50 (s, 1H), 7.72 (dd,  $J = 8.4$  Hz, 5.6 Hz, 1H), 7.52 (s, 1H), 7.11 (d,  $J = 8.6$  Hz, 1H), 7.05 (t,  $J = 8.6$  Hz, 1H);  $^{13}\text{C}$  NMR (100 MHz,  $\text{CDCl}_3$ )  $\delta$  160.7 (d,  $J = 239$  Hz, 1C), 136.2 (d,  $J = 13$  Hz, 1C), 133.3 (d,  $J = 2$  Hz, 1C), 129.5 (q,  $J = 308$  Hz, 1C), 126.0, 120.5 (d,  $J = 10$  Hz, 1C), 110.7 (d,  $J = 24$  Hz, 1C), 98.3 (d,  $J = 27$  Hz, 1C), 96.1 (q,  $J = 2.0$  Hz, 1C);  $^{19}\text{F}$  NMR (376 MHz,  $\text{CDCl}_3$ )  $\delta$  -44.49, -119.03.

**6-chloro-3-((trifluoromethyl)thio)-1H-indole (3m).<sup>1</sup>**

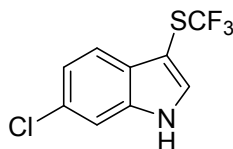

White solid (75 mg, 60%). Eluent: ethyl acetate/petroleum ether = 1/10.  $^1\text{H}$  NMR (400 MHz,  $\text{CDCl}_3$ )  $\delta$  8.46 (s, 1H), 7.71 (d,  $J = 8.4$  Hz, 1H), 7.51 (d,  $J = 2.8$  Hz, 1H), 7.40 (d,  $J = 1.2$  Hz, 1H), 6.68 (dd,  $J = 8.4$  Hz, 1.2 Hz, 1H);  $^{13}\text{C}$  NMR (100 MHz,  $\text{CDCl}_3$ )  $\delta$  136.4, 133.5, 129.6, 129.4 (q,  $J = 308$  Hz, 1C), 128.2, 122.6, 120.5, 111.8, 96.2 (q,  $J = 2$  Hz, 1C);  $^{19}\text{F}$  NMR (376 MHz,  $\text{CDCl}_3$ )  $\delta$  -44.43.

### 6-methoxy-3-((trifluoromethyl)thio)-1*H*-indole (3n).<sup>1</sup>

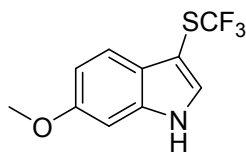

White solid (86 mg, 70%). Eluent: ethyl acetate/petroleum ether = 1/10. <sup>1</sup>H NMR (400 MHz, CDCl<sub>3</sub>) δ 8.39 (s, 1H), 7.66 (d, *J* = 8.8 Hz, 1H), 7.43 (d, *J* = 2.4 Hz, 1H), 6.94 (dd, *J* = 8.8 Hz, 2.0 Hz, 1H), 6.89 (d, *J* = 2.0 Hz, 1H), 3.86 (s, 3H); <sup>13</sup>C NMR (100 MHz, CDCl<sub>3</sub>) δ 157.5, 137.0, 131.7, 129.5 (q, *J* = 308 Hz, 1C), 123.7, 120.2, 111.8, 95.7, 95.1, 55.9; <sup>19</sup>F NMR (376 MHz, CDCl<sub>3</sub>) δ -44.62.

### 7-methyl-3-((trifluoromethyl)thio)-1*H*-indole (3o).<sup>1</sup>

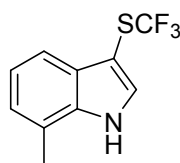

White solid (79 mg, 68%). Eluent: ethyl acetate/petroleum ether = 1/10. <sup>1</sup>H NMR (400 MHz, CDCl<sub>3</sub>) δ 8.30 (s, 1H), 7.64 (d, *J* = 8.0 Hz, 1H), 7.42 (d, *J* = 2.8 Hz, 1H), 7.18 (t, *J* = 8.0 Hz, 1H), 7.06 (d, *J* = 2.8 Hz, 1H), 2.42 (s, 3H); <sup>13</sup>C NMR (100 MHz, CDCl<sub>3</sub>) δ 135.7, 132.6, 129.6 (q, *J* = 308 Hz, 1C), 129.2, 124.1, 121.9, 121.1, 117.1, 95.9 (q, *J* = 2 Hz, 1C), 16.3; <sup>19</sup>F NMR (376 MHz, CDCl<sub>3</sub>) δ -44.45.

### Methyl 3-((trifluoromethyl)thio)-1*H*-indole-7-carboxylate (3p).<sup>3</sup>

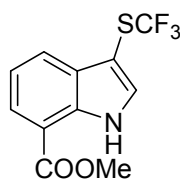

White solid (56 mg, 41%). Eluent: ethyl acetate/petroleum ether = 1/10. <sup>1</sup>H NMR (400 MHz, CDCl<sub>3</sub>) δ 10.25 (s, 1H), 8.02 (d, *J* = 8.0 Hz, 1H), 7.97 (d, *J* = 7.6 Hz, 1H), 7.65 (d, *J* = 2.0 Hz, 1H), 7.32 (t, *J* = 7.6 Hz, 1H), 4.00 (s, 1H); <sup>13</sup>C NMR (100 MHz, DMSO-*d*<sub>6</sub>) δ 167.6, 136.2, 134.0, 130.6, 129.4 (q, *J* = 308 Hz, 1C), 125.7, 125.1, 121.1, 113.6, 95.9 (q, *J* = 3.0 Hz, 1C), 52.2; <sup>19</sup>F NMR (376 MHz, CDCl<sub>3</sub>) δ -44.60.

### 1-methyl-3-((trifluoromethyl)thio)-1*H*-indole (3q).<sup>1</sup>

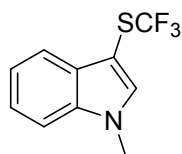

White soild (58 mg, 50%). Eluent: ethyl acetate/petroleum ether = 1/10.  $^1\text{H}$  NMR (400 MHz,  $\text{CDCl}_3$ )  $\delta$  7.79 (d,  $J = 7.6$  Hz, 1H), 7.37-7.24 (m, 4H), 3.82 (s, 3H);  $^{13}\text{C}$  NMR (100 MHz,  $\text{CDCl}_3$ )  $\delta$  137.3, 137.0, 130.4, 129.6 (q,  $J = 308$  Hz, 1C), 123.1, 121.4, 119.5, 110.0, 93.1 (q,  $J = 2$  Hz, 1C), 33.1;  $^{19}\text{F}$  NMR (376 MHz,  $\text{CDCl}_3$ )  $\delta$  -44.93.

**1-phenyl-3-((trifluoromethyl)thio)-1H-indole (3r).<sup>1</sup>**

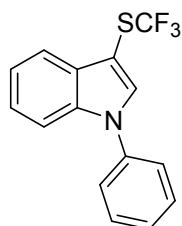

White soild (66 mg, 45%). Eluent: ethyl acetate/petroleum ether = 1/10.  $^1\text{H}$  NMR (400 MHz,  $\text{CDCl}_3$ )  $\delta$  7.89-7.87 (m, 1H), 7.67 (s, 1H), 7.59-7.50 (m, 5H), 7.45 (d,  $J = 7.2$  Hz, 1H), 7.36-7.30 (m, 2H);  $^{13}\text{C}$  NMR (100 MHz,  $\text{CDCl}_3$ )  $\delta$  138.6, 136.7, 136.1, 130.7, 130.0, 129.6 (q,  $J = 308$  Hz, 1C), 127.8, 124.8, 123.8, 122.2, 119.8, 111.2, 96.3 (q,  $J = 2$  Hz, 1C);  $^{19}\text{F}$  NMR (376 MHz,  $\text{CDCl}_3$ )  $\delta$  -44.33.

**2-methyl-3-((trifluoromethyl)thio)-1H-indole (3s).<sup>1</sup>**

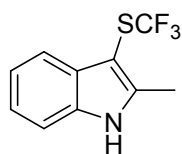

White soild (59 mg, 51%). Eluent: ethyl acetate/petroleum ether = 1/10.  $^1\text{H}$  NMR (400 MHz,  $\text{CDCl}_3$ )  $\delta$  8.11 (s, 1H), 7.69 (d,  $J = 7.2$  Hz, 1H), 7.25-7.17 (m, 3H), 2.49 (s, 3H);  $^{13}\text{C}$  NMR (100 MHz,  $\text{CDCl}_3$ )  $\delta$  143.7, 135.1, 130.7, 129.9 (q,  $J = 309$  Hz, 1C), 122.7, 121.5, 118.8, 110.9, 92.6 (q,  $J = 3.0$  Hz, 1C), 12.1;  $^{19}\text{F}$  NMR (376 MHz,  $\text{CDCl}_3$ )  $\delta$  -44.35.

**1,2-Dimethyl-3-((trifluoromethyl)thio)-1H-indole (3t).<sup>1</sup>**

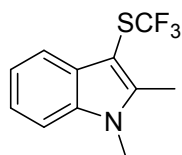

White soild (53 mg, 43%). Eluent: ethyl acetate/petroleum ether = 1/10.  $^1\text{H}$  NMR (400 MHz,  $\text{CDCl}_3$ )  $\delta$  7.72-7.70 (m, 1H), 7.27-7.19 (m, 3H), 3.64 (s, 3H), 2.52 (s, 3H);  $^{13}\text{C}$  NMR (100 MHz,

CDCl<sub>3</sub>)  $\delta$  145.3, 136.9, 130.2, 129.9 (q,  $J$  = 309 Hz, 1C), 122.3, 121.2, 118.8, 109.3, 91.1 (q,  $J$  = 2.0 Hz, 1C), 30.4, 10.9; <sup>19</sup>F NMR (376 MHz, CDCl<sub>3</sub>)  $\delta$  -44.86

**3-methyl-2-((trifluoromethyl)thio)-1H-indole (3u).**<sup>1</sup>

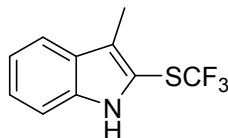

White soild (36 mg, 31%). Eluent: ethyl acetate/petroleum ether = 1/10. <sup>1</sup>H NMR (400 MHz, CDCl<sub>3</sub>)  $\delta$  8.10 (s, 1H), 7.62 (d,  $J$  = 7.6 Hz, 1H), 7.37-7.30 (m, 2H), 7.18 (t,  $J$  = 7.2 Hz, 1H), 2.47 (s, 1H); <sup>13</sup>C NMR (100 MHz, CDCl<sub>3</sub>)  $\delta$  137.5, 128.9 (q,  $J$  = 310 Hz, 1C), 128.1, 124.9, 123.8, 120.2, 120.1, 113.2, 111.2, 9.55; <sup>19</sup>F NMR (376 MHz, CDCl<sub>3</sub>)  $\delta$  -43.07.

**(trifluoromethyl)(2,4,6-trimethoxyphenyl)sulfane (3v).**<sup>4</sup>

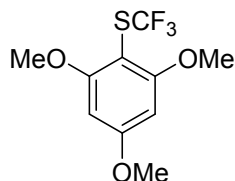

White soild (82 mg, 61%). Eluent: ethyl acetate/petroleum ether = 1/30. <sup>1</sup>H NMR (400 MHz, CDCl<sub>3</sub>)  $\delta$  6.15 (s, 2H), 3.86 (s, 6H), 3.84 (s, 3H); <sup>13</sup>C NMR (100 MHz, CDCl<sub>3</sub>)  $\delta$  164.5, 163.6, 129.7 (q,  $J$  = 309.0 Hz, 1C), 91.9, 91.3, 56.3 (q,  $J$  = 4.4 Hz, 1C), 55.5 (q,  $J$  = 4.4 Hz, 1C); <sup>19</sup>F NMR (376 MHz, CDCl<sub>3</sub>)  $\delta$  -43.50.

**ethyl 2,4-dimethyl-5-((trifluoromethyl)thio)-1H-pyrrole-3-carboxylate (3w).**<sup>4</sup>

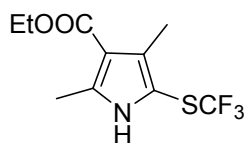

Brown soild (48 mg, 36%). Eluent: ethyl acetate/petroleum ether = 1/10. <sup>1</sup>H NMR (400 MHz, CDCl<sub>3</sub>)  $\delta$  8.46 (s, 1H), 4.30 (q,  $J$  = 7.2 Hz, 2H), 2.53 (s, 3H), 2.36 (s, 3H), 1.36 (t,  $J$  = 7.2 Hz, 3H); <sup>13</sup>C NMR (100 MHz, CDCl<sub>3</sub>)  $\delta$  165.3 (q,  $J$  = 2.0 Hz, 1C), 140.2, 133.9, 128.6 (q,  $J$  = 310.2 Hz, 1C), 113.4, 104.6 (q,  $J$  = 2.3 Hz, 1C), 59.7, 14.6, 14.4 (q,  $J$  = 3.2 Hz, 1C), 12.2 (q,  $J$  = 2.9 Hz, 1C); <sup>19</sup>F NMR (376 MHz, CDCl<sub>3</sub>)  $\delta$  -44.94.

**2,5-dimethyl-1-phenyl-3-((trifluoromethyl)thio)-1H-pyrrole (3x).**<sup>4</sup>



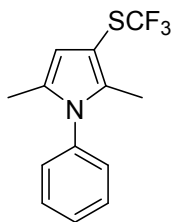

Brown solid (34 mg, 25%). Eluent: petroleum ether.  $^1\text{H}$  NMR (400 MHz,  $\text{CDCl}_3$ )  $\delta$  7.52-7.43 (m, 3H), 7.22-7.19 (m, 2H), 6.13 (s, 1H), 2.11 (s, 3H), 2.00 (s, 3H);  $^{13}\text{C}$  NMR (100 MHz,  $\text{CDCl}_3$ )  $\delta$  138.4, 136.7, 129.9 (q,  $J = 307.3$  Hz, 1C), 129.6, 129.5, 128.6, 128.2, 112.7, 97.7 (q,  $J = 2.1$  Hz, 1C), 12.9, 11.2 (q,  $J = 1.8$  Hz, 1C);  $^{19}\text{F}$  NMR (376 MHz,  $\text{CDCl}_3$ )  $\delta$  -45.30.

**2-((trifluoromethyl)thio)indolizine-1-carbonitrile (3y).<sup>4</sup>**

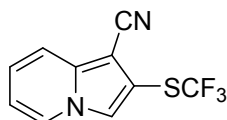

Yellow solid (61 mg, 50%). Eluent: ethyl acetate/petroleum ether = 1/10.  $^1\text{H}$  NMR (400 MHz,  $\text{CDCl}_3$ )  $\delta$  8.55 (d,  $J = 6.8$  Hz, 1H), 7.74 (dt,  $J = 8.9$  Hz, 1.1 Hz, 1H), 7.50 (s, 1H), 7.32 (ddd,  $J = 8.9$  Hz, 6.8 Hz, 1.0 Hz, 1H), 7.02 (td,  $J = 6.8$  Hz, 1.1 Hz, 1H);  $^{13}\text{C}$  NMR (100 MHz,  $\text{CDCl}_3$ )  $\delta$  141.3, 129.7, 128.3 (q,  $J = 311.9$  Hz, 1C), 125.5, 125.1, 118.2, 115.2, 114.5, 103.6, 84.6;  $^{19}\text{F}$  NMR (376 MHz,  $\text{CDCl}_3$ )  $\delta$  -44.07.

**diethyl 1-((trifluoromethyl)thio)pyrrolo[1,2-a]quinoline-2,3-dicarboxylate (3z).**

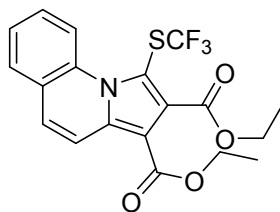

Yellow solid (58 mg, 28%). Eluent: ethyl acetate/petroleum ether = 1/10.  $^1\text{H}$  NMR (400 MHz,  $\text{CDCl}_3$ )  $\delta$  8.88 – 8.59 (m, 1H), 8.37 (d,  $J = 7.4$  Hz, 1H), 7.71-7.68 (m, 1H), 7.62-7.56 (m, 2H), 7.16 (d,  $J = 7.4$  Hz, 1H), 4.47 (q,  $J = 7.2$  Hz, 2H), 4.45 (q,  $J = 7.2$  Hz, 2H), 1.42 (t,  $J = 7.2$  Hz, 3H), 1.41 (t,  $J = 7.2$  Hz, 3H);  $^{13}\text{C}$  NMR (100 MHz,  $\text{CDCl}_3$ )  $\delta$  165.5, 163.8, 133.4, 130.6, 129.4, 129.0, 128.6, 128.3 (q,  $J = 312.2$  Hz, 1C), 127.5, 125.6, 124.9, 121.4, 115.6, 111.1, 105.2 (q,  $J = 2.5$  Hz, 1C), 61.7, 61.6, 14.3, 14.2;  $^{19}\text{F}$  NMR (376 MHz,  $\text{CDCl}_3$ )  $\delta$  -42.96. HRMS (ESI)  $m/e$  calcd for  $\text{C}_{19}\text{H}_{16}\text{NO}_4\text{F}_3\text{S}$  (M+H)<sup>+</sup> 412.0825, found 412.0828.

#### 4) Experiments for the mechanistic study

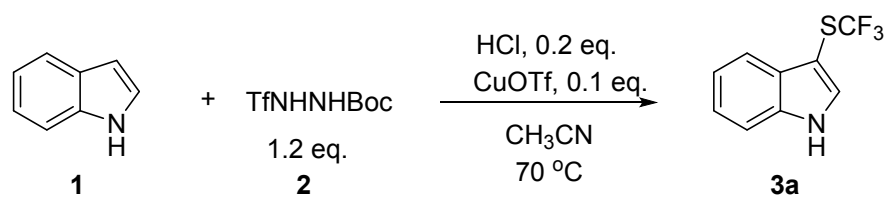

A 15 ml sealing tube with a magnetic stirring bar was charged with indole (59 mg, 0.5 mmol), TfNHNHBoc (158 mg, 0.6 mmol) and CuOTf (11 mg, 0.05 mmol), dry acetonitrile (2 mL) was added via syringe with gentle stirring. Then 12 M HCl (aq) (8  $\mu$ L, 0.1 mmol) was added to the reaction mixture and the resulting mixture was stirred at 70 °C and monitored by <sup>19</sup>F NMR spectroscopies with PhCF<sub>3</sub> ( $\delta$  = -63.2 ppm) as the internal standard.

15min

-45.230  
-46.165  
-63.198  
-76.442  
-78.858  
-85.003

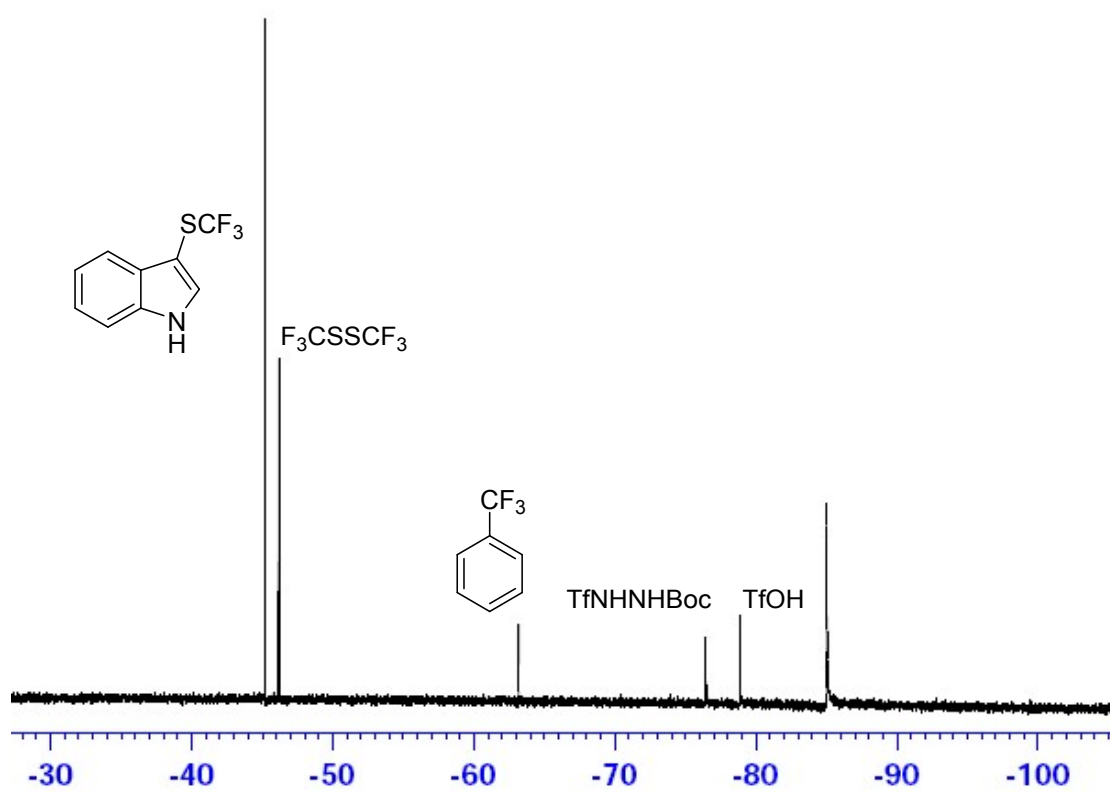

30min

--45.206  
--46.155

---63.200

---78.836

---84.811

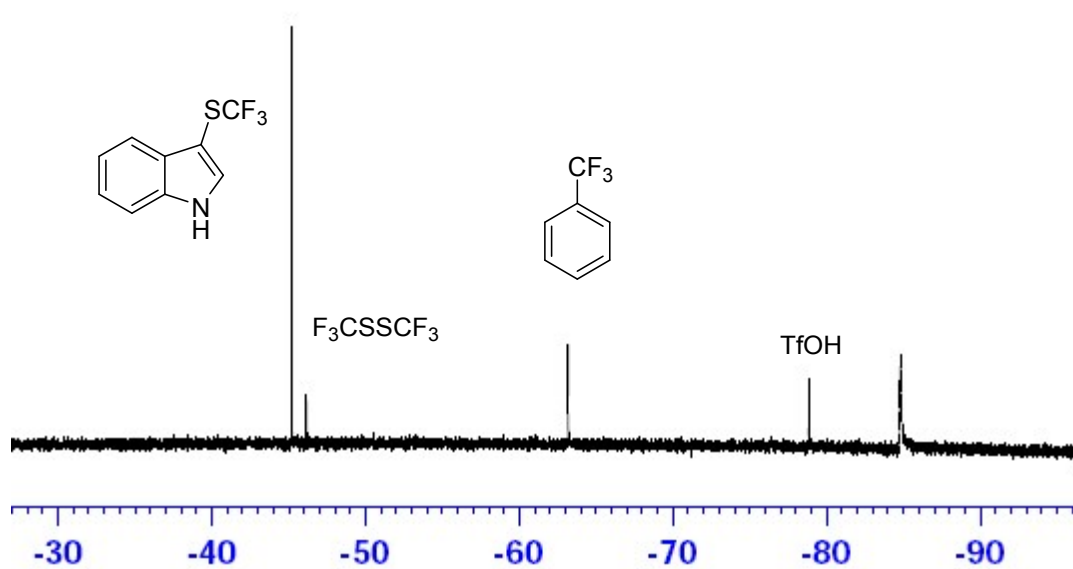

45min

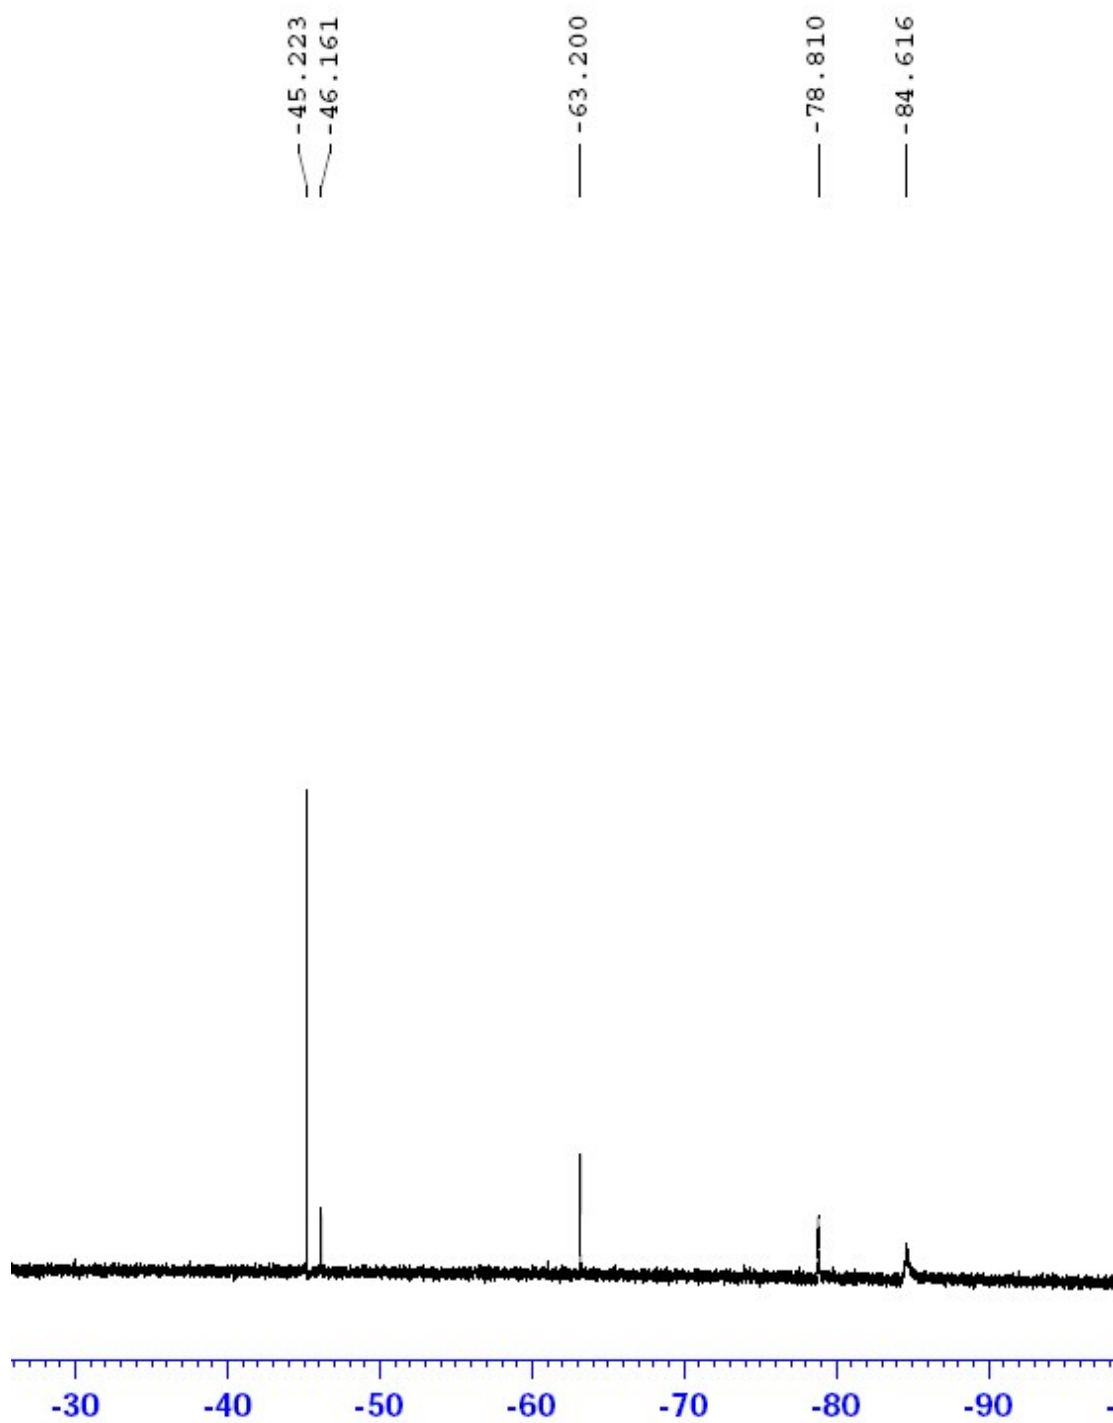

1h

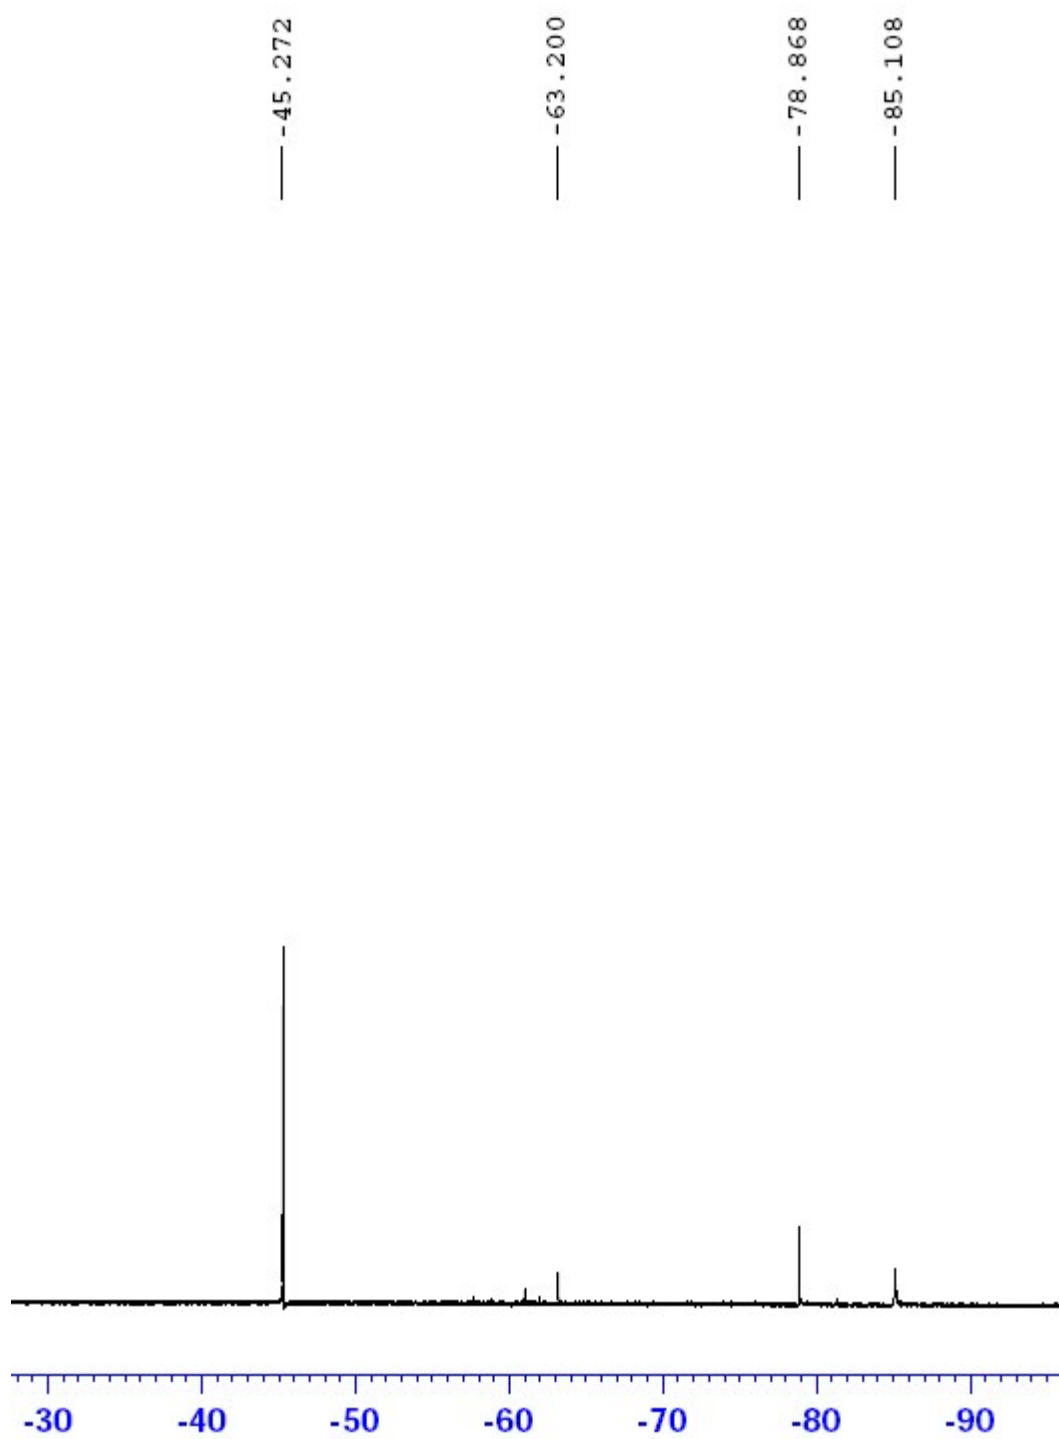

2h

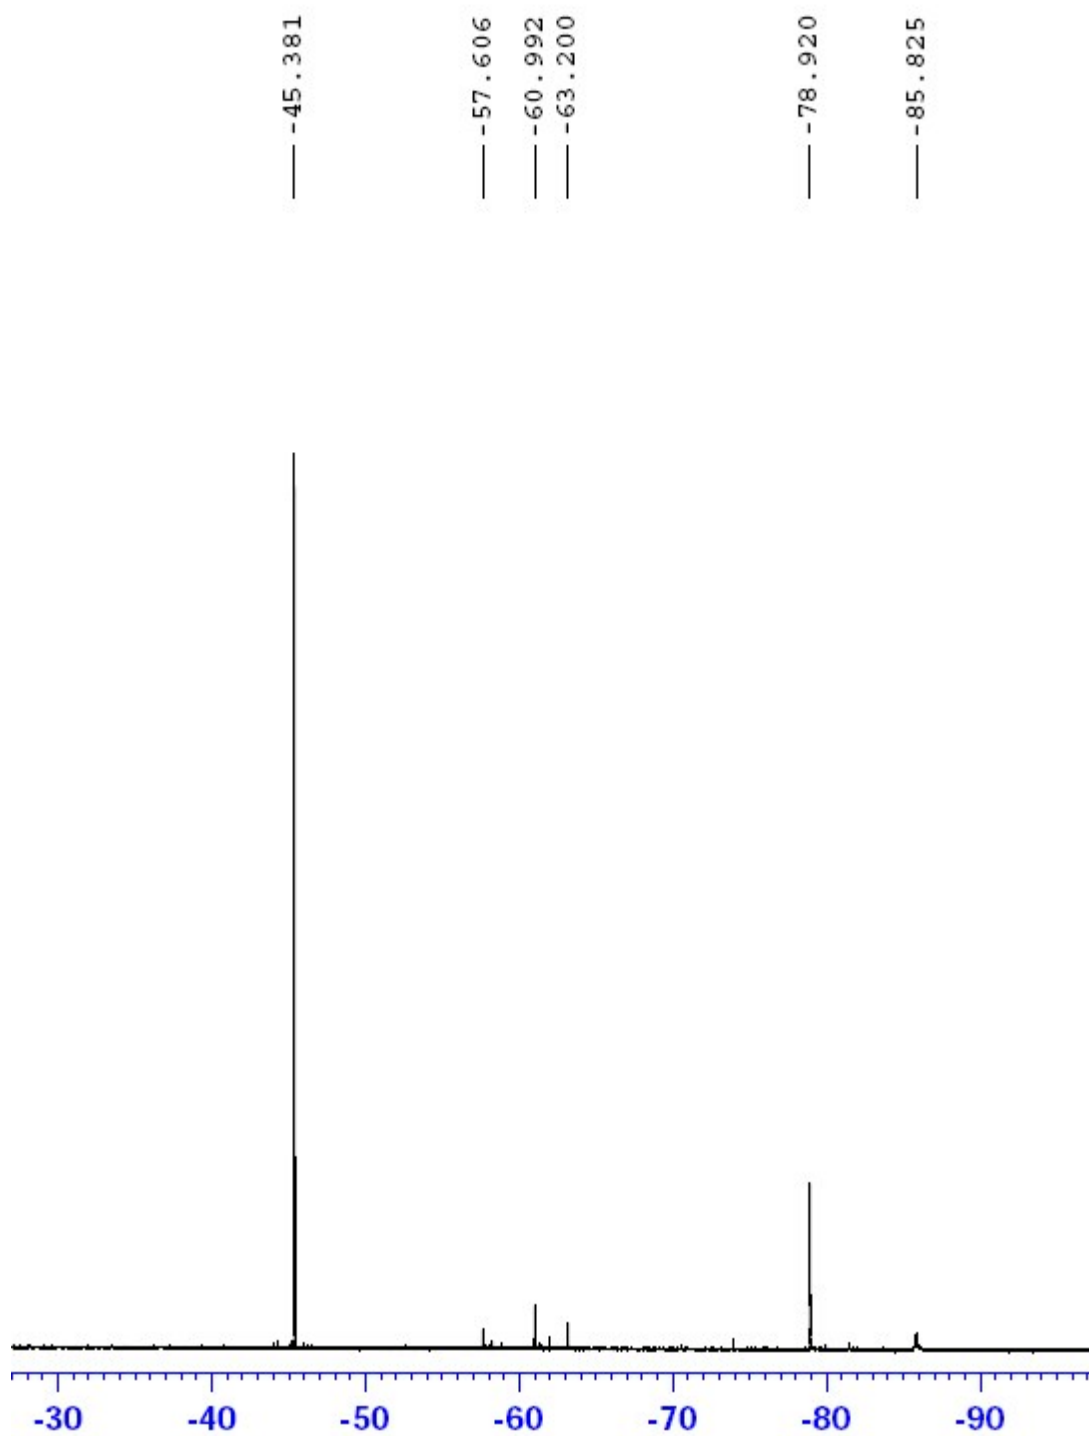

4h

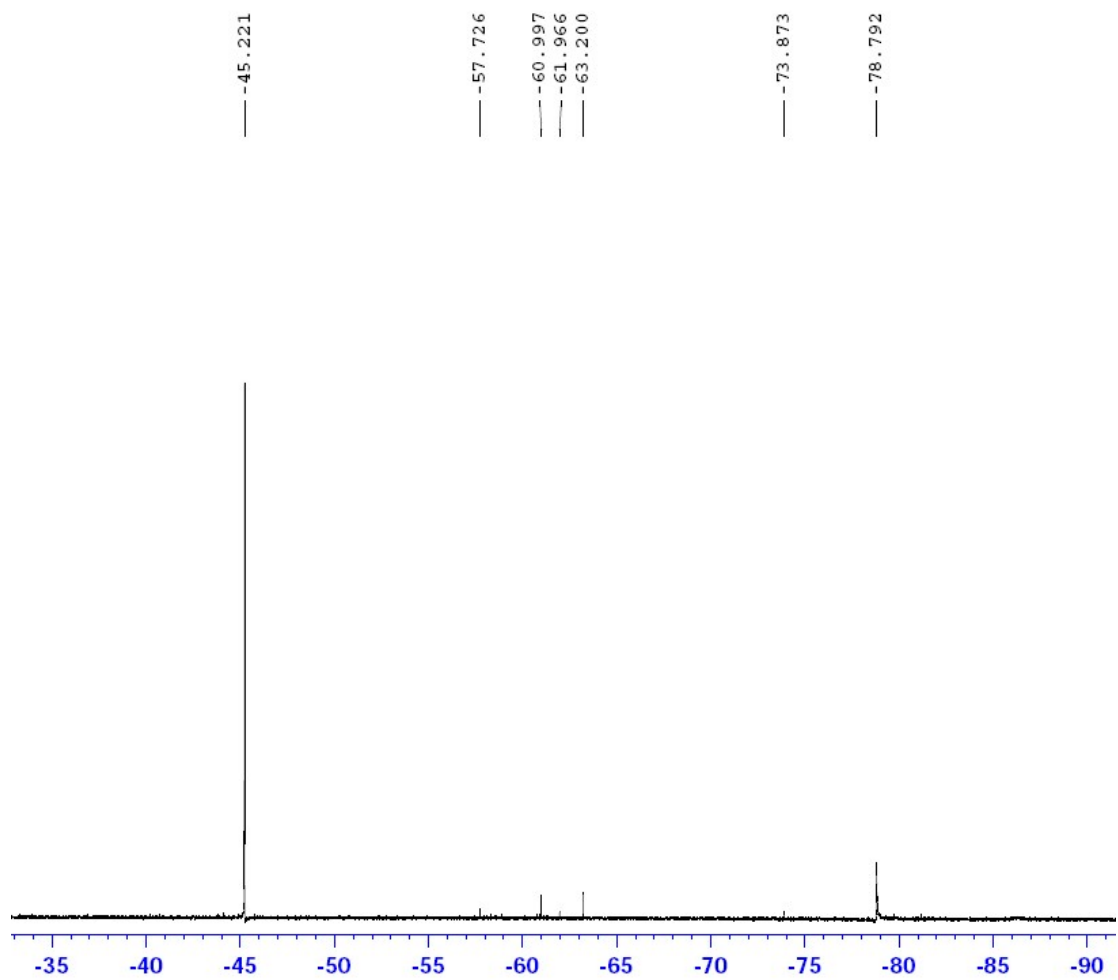



7h

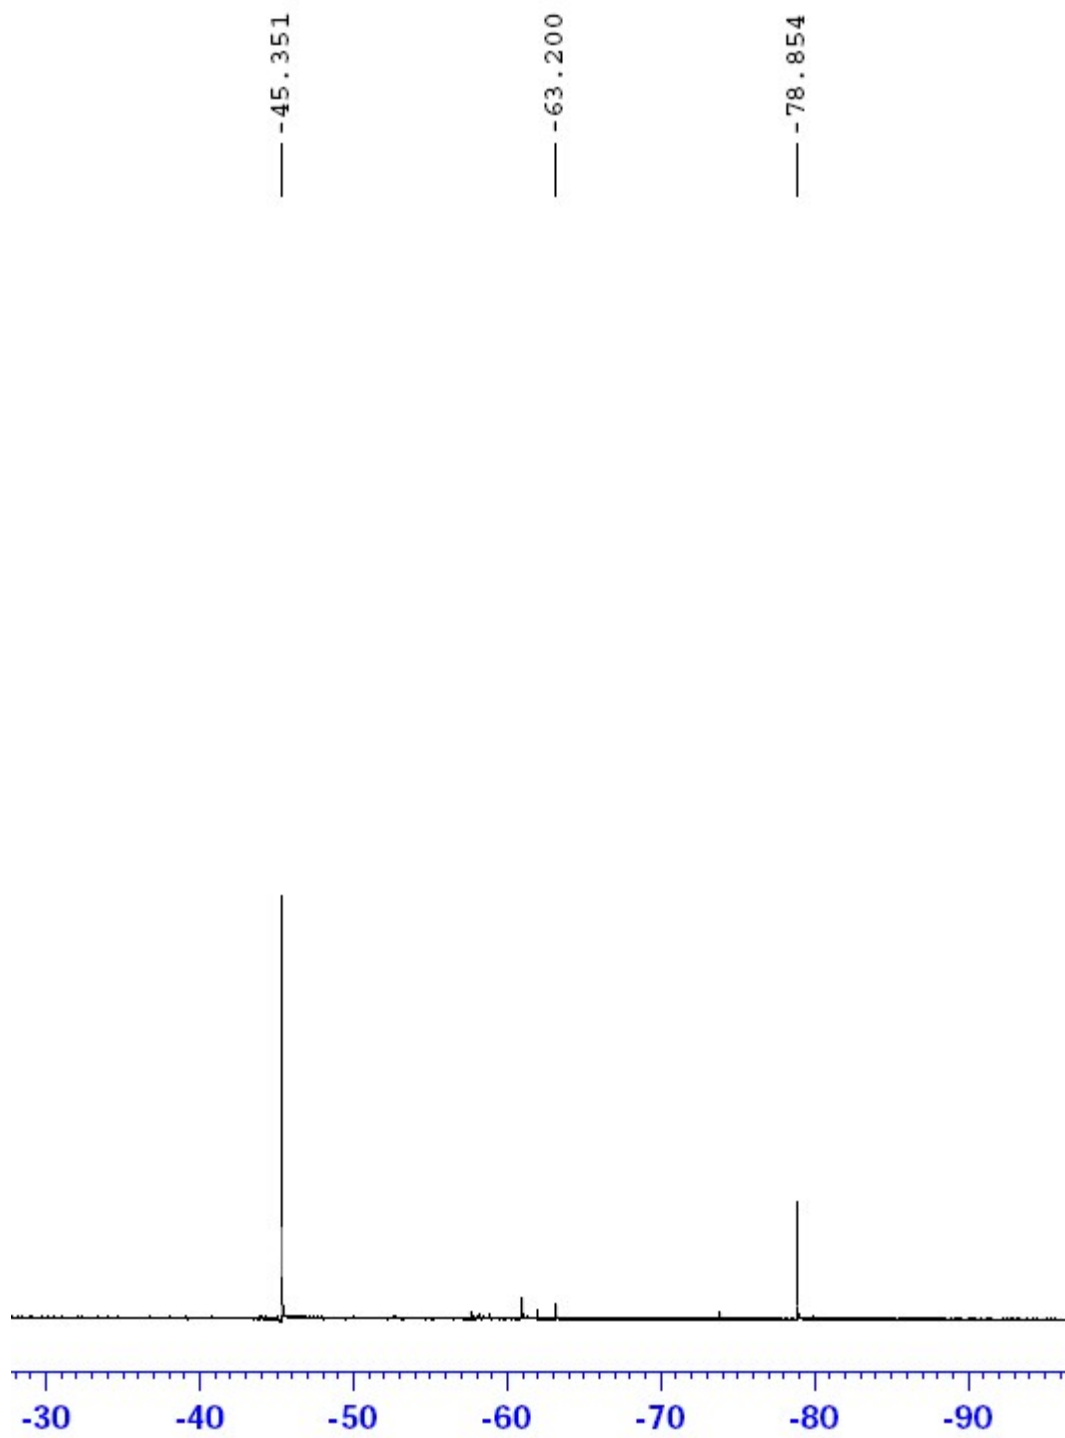

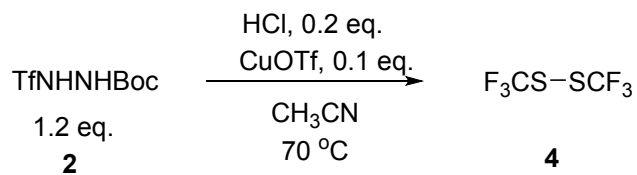

A 15 ml sealing tube with a magnetic stirring bar was charged with TfNHNHBoc (158 mg, 0.6 mmol) and CuOTf (11 mg, 0.05 mmol), dry acetonitrile (2 mL) was added via syringe with gentle stirring. Then 12 M HCl (aq) (8 uL, 0.1 mmol) was added to the reaction mixture and the resulting mixture was stirred at 70 °C and monitored by  $^{19}\text{F}$  NMR spectroscopies with  $\text{PhCF}_3$  ( $\delta = -63.2$  ppm) as the internal standard.

15min

— -46.247

— -63.199

— -76.740

— -78.990

— -84.550

TfNHNHBoc

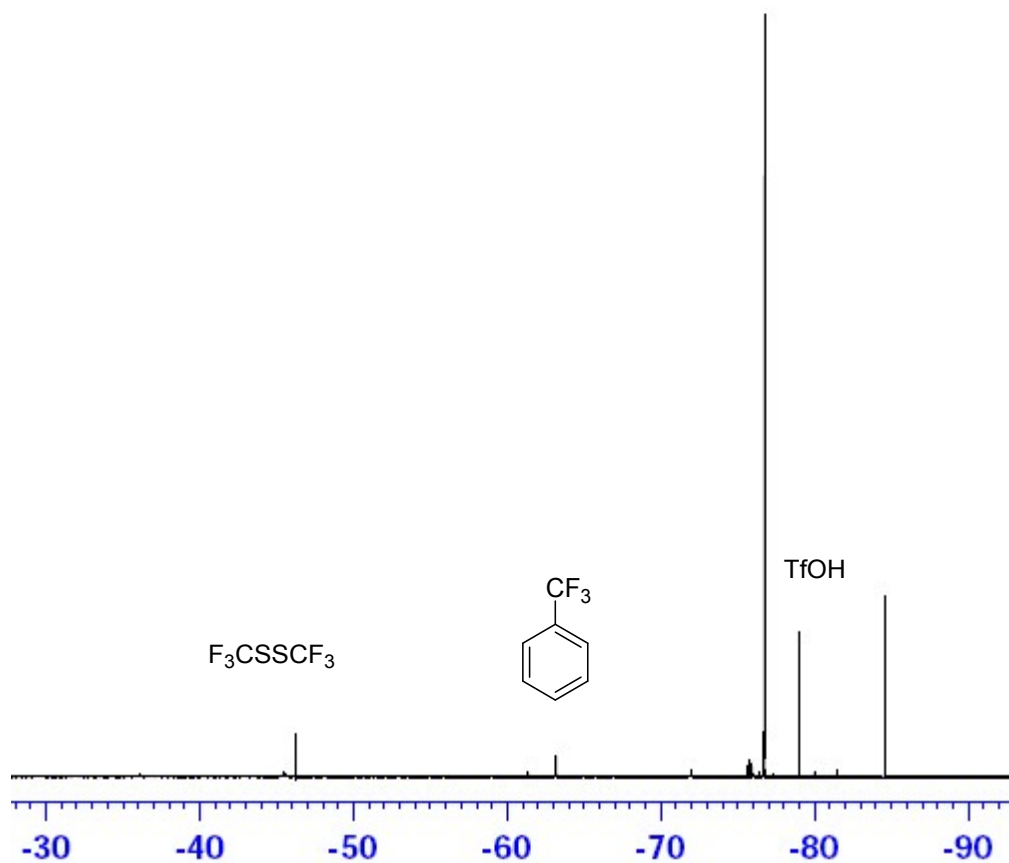

30min

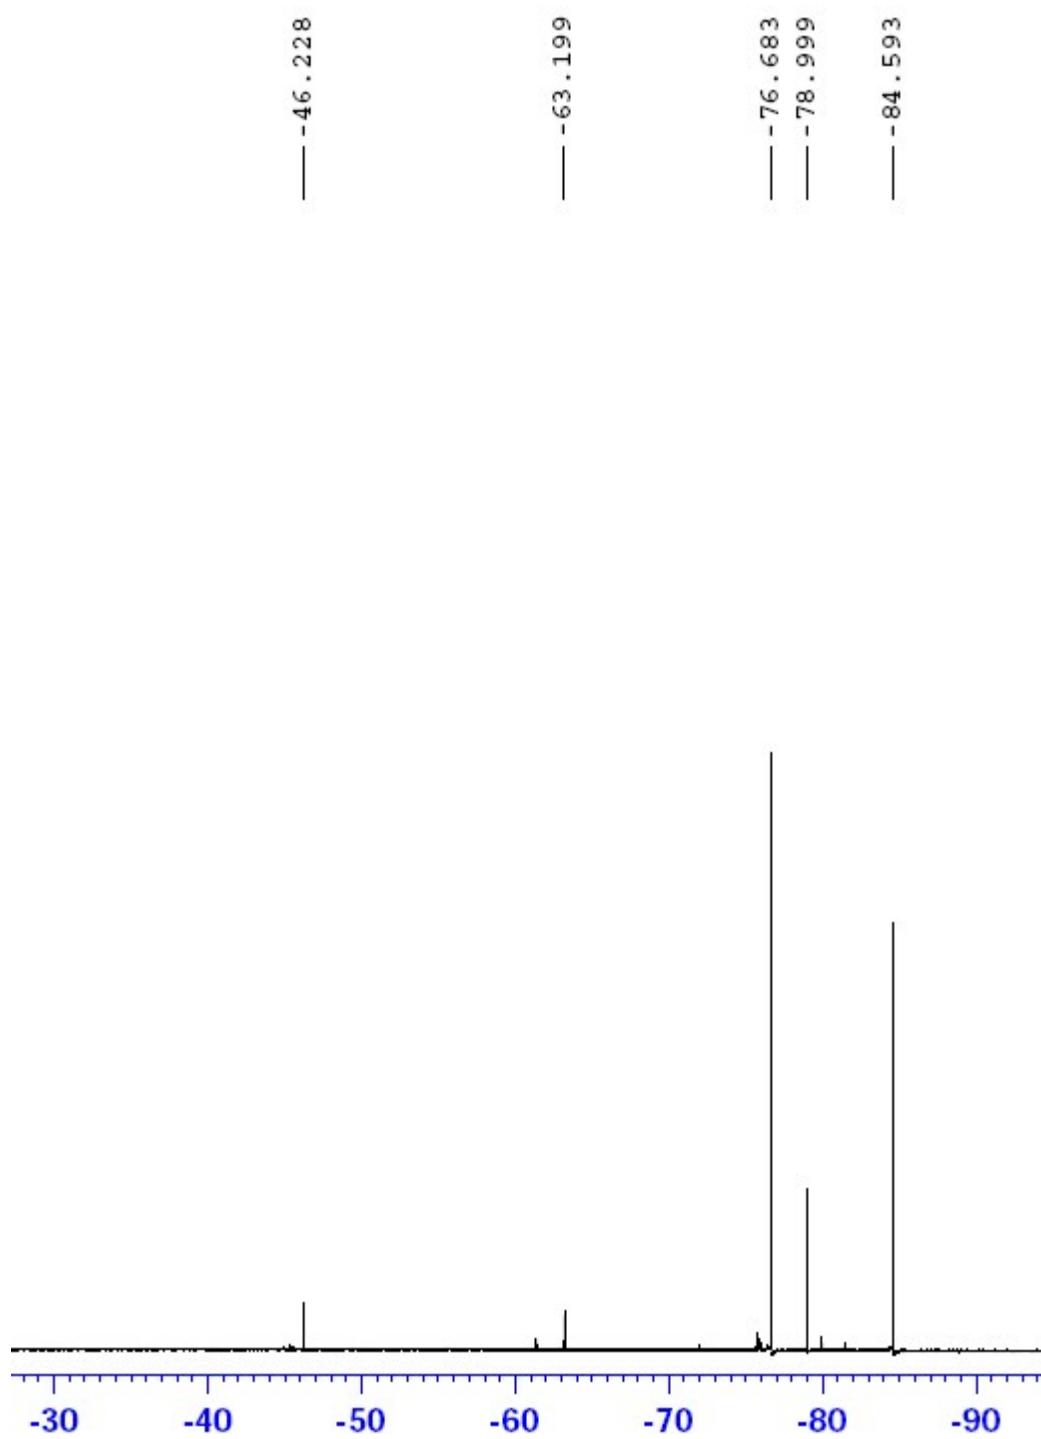

1h

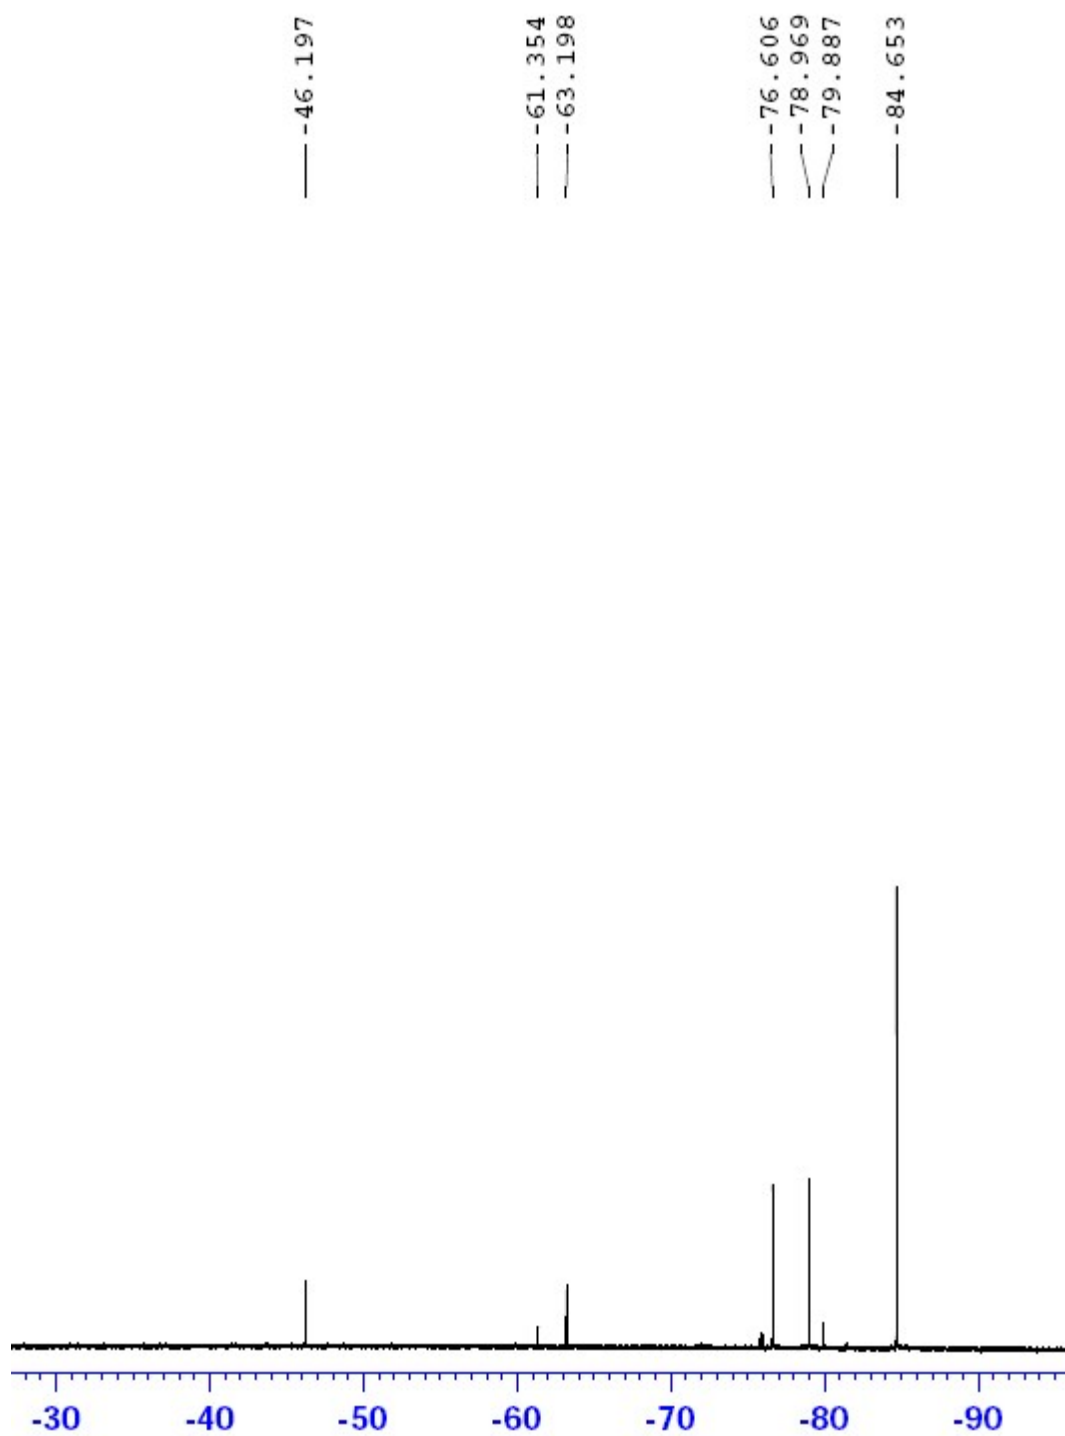

2h

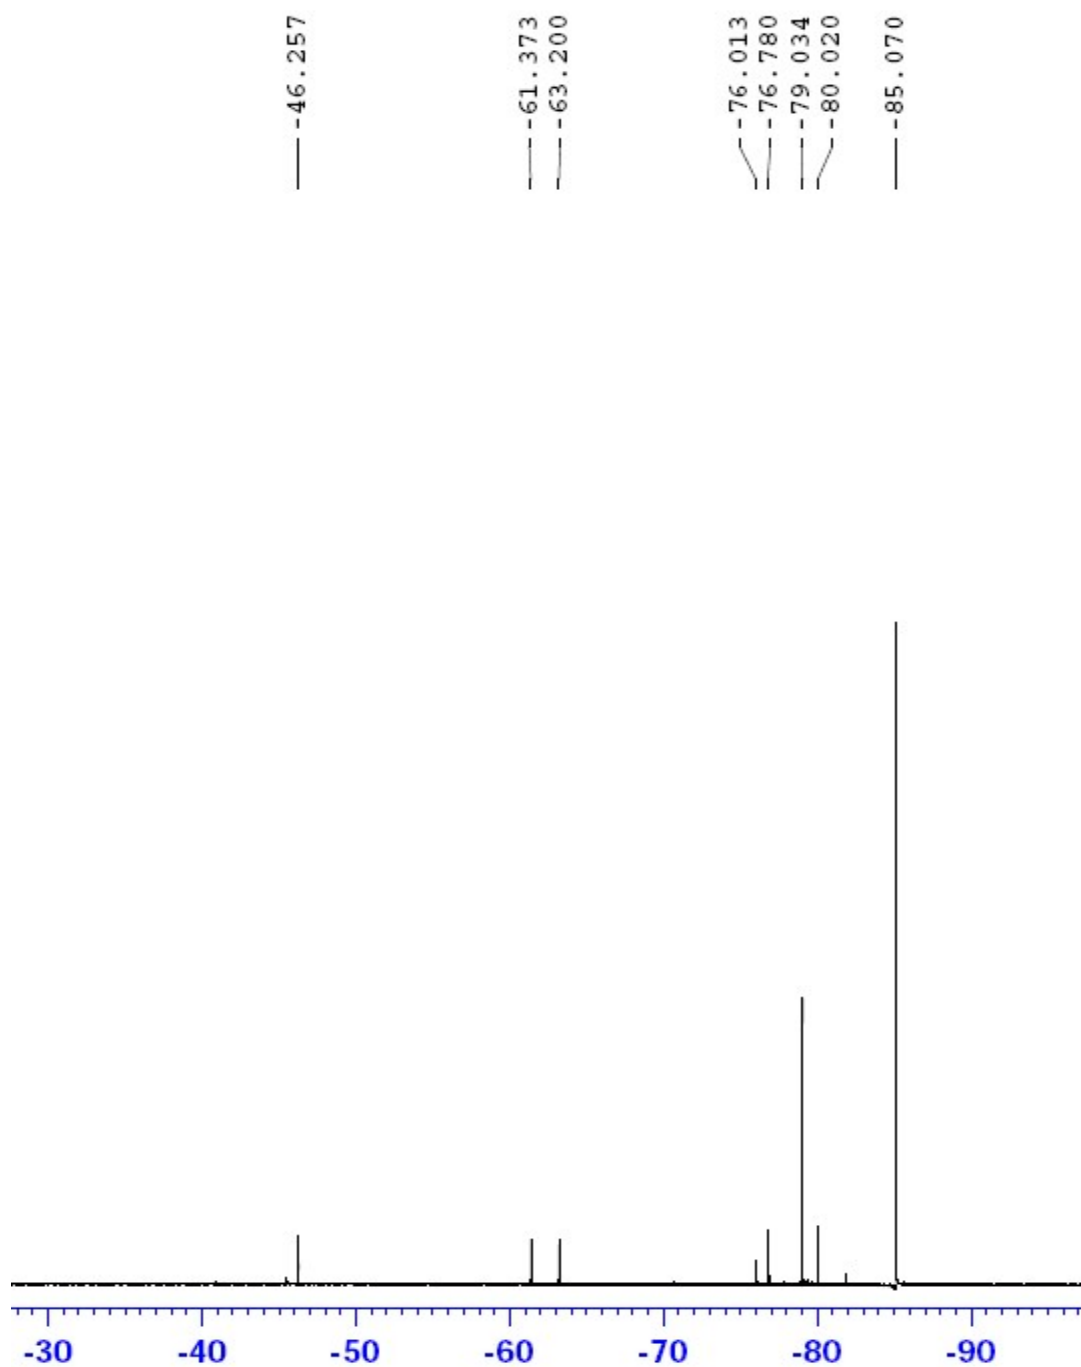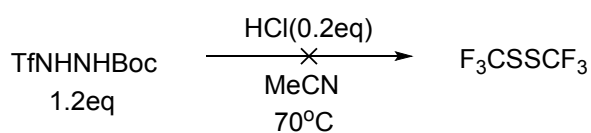

A 15 ml sealing tube with a magnetic stirring bar was charged with TfNHNHBoc (158 mg, 0.6 mmol), dry acetonitrile (2 mL) was added via syringe with gentle stirring. Then 12 M HCl (aq) (8  $\mu\text{L}$ , 0.1 mmol) was added to the reaction mixture and the resulting mixture was stirred at 70  $^\circ\text{C}$  and monitored by  $^{19}\text{F}$  NMR spectroscopies

with PhCF<sub>3</sub> ( $\delta = -63.2$  ppm) as the internal standard.

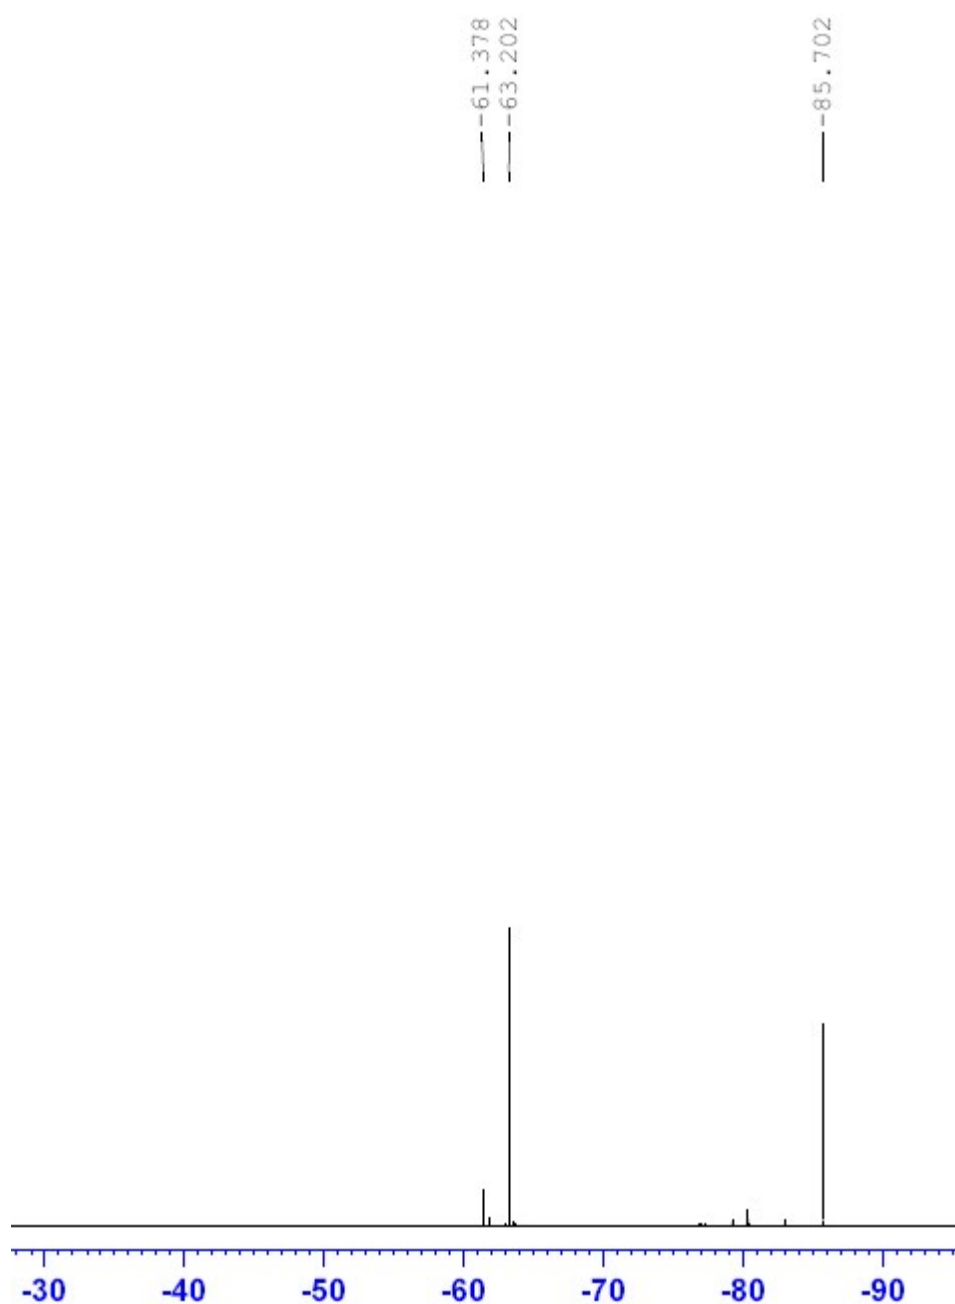

## 5) References

- [1] Lu, K.; Deng, Z.; Li, M.; Li, T.; Zhao, X. *Org. Biomol. Chem.* **2017**, *15*, 1254–1260.
- [2] Shao, X.; Xu, C.; Lu, L.; Shen, Q. *J. Org. Chem.* **2015**, *80*, 3012–3021.
- [3] Bu, M.; Lu, G.; Cai, C. *Org. Chem. Front.* **2017**, *4*, 266–270.
- [4] Zhao, X.; Zheng, C.; Tian, M.; Sheng, J.; Tong, Y.; Lu, K. *Tetrahedron* **2017**, *73*, 7233–7238.

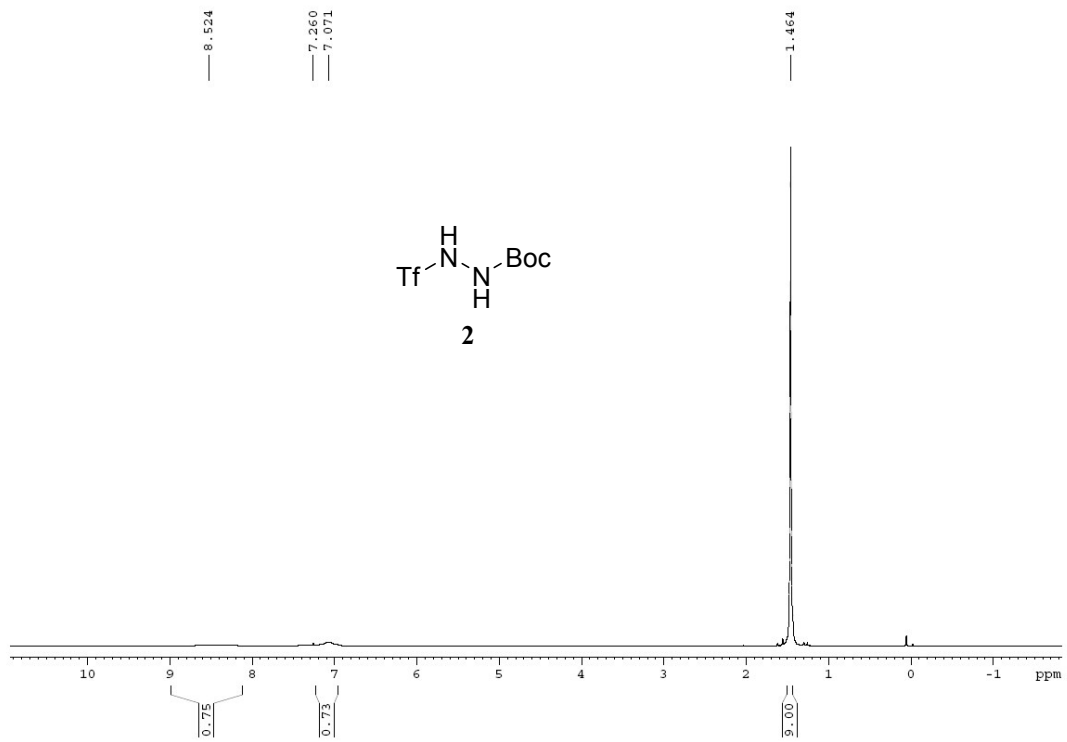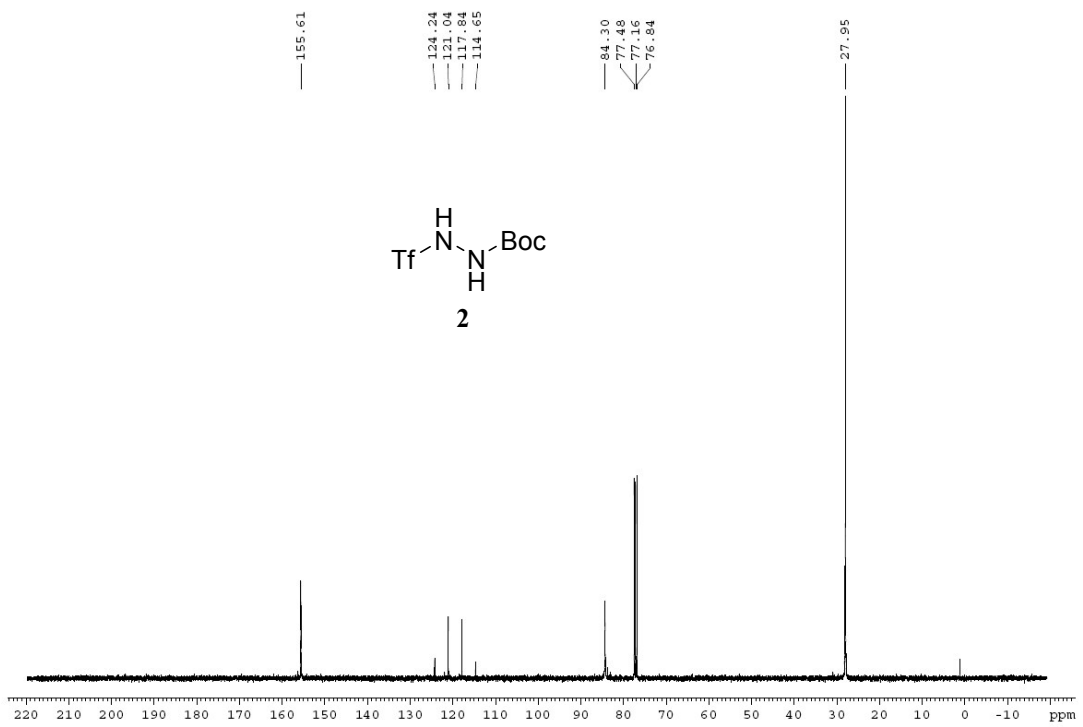



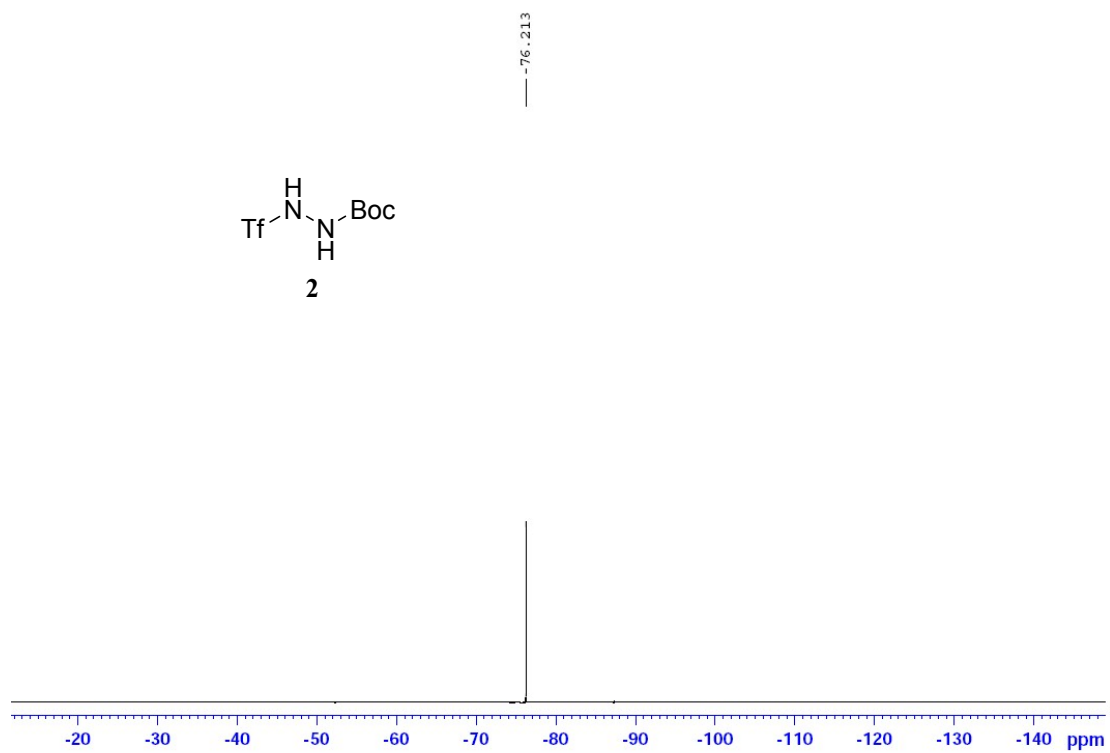

8.474  
7.843  
7.827  
7.821  
7.536  
7.530  
7.441  
7.436  
7.421  
7.336  
7.318  
7.309  
7.299  
7.282  
7.260

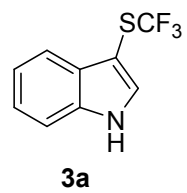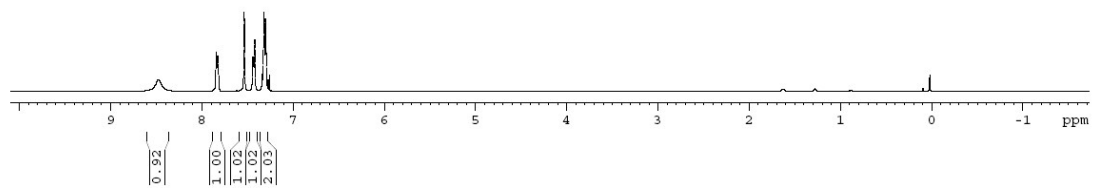

136.14  
134.23  
132.97  
131.16  
129.55  
128.07  
125.00  
123.54  
121.76  
119.42  
111.85  
95.57  
95.55  
77.48  
77.16  
76.84

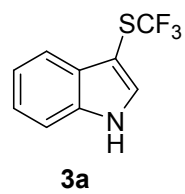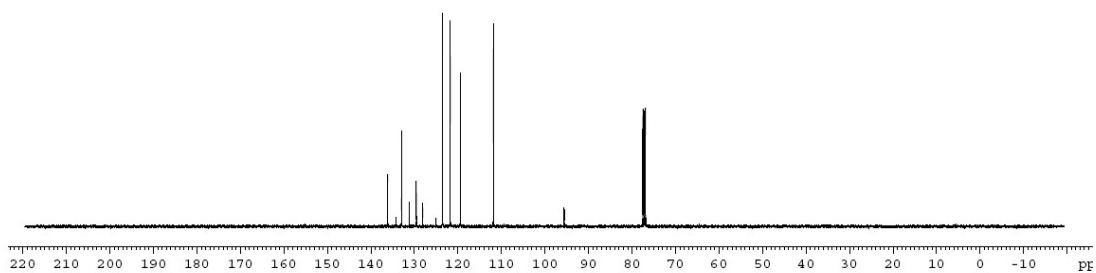

— 44.460

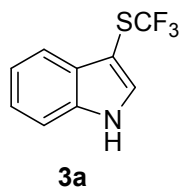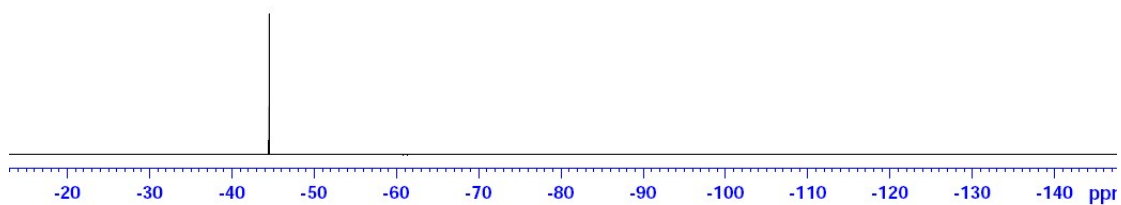

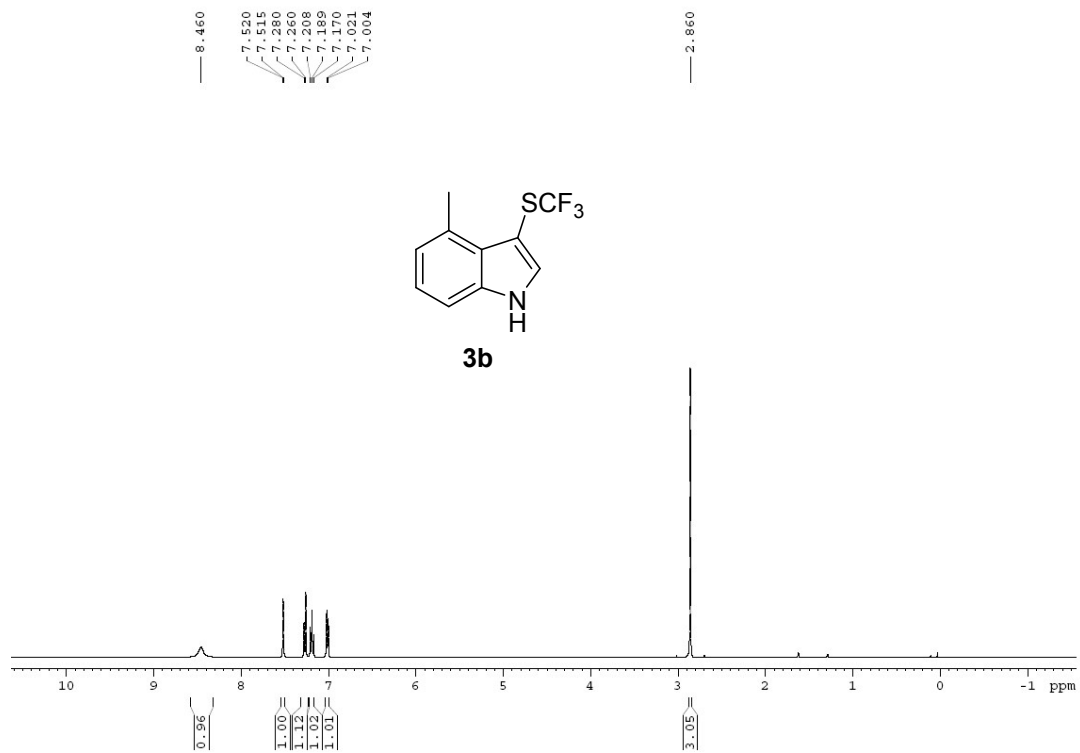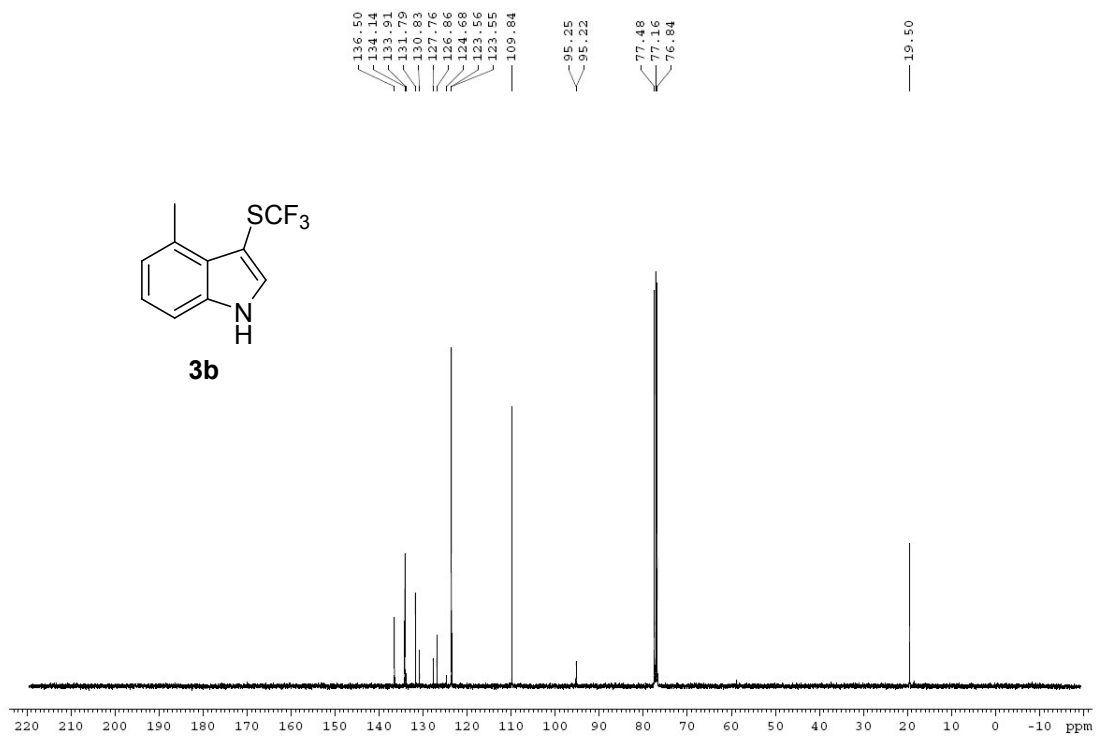

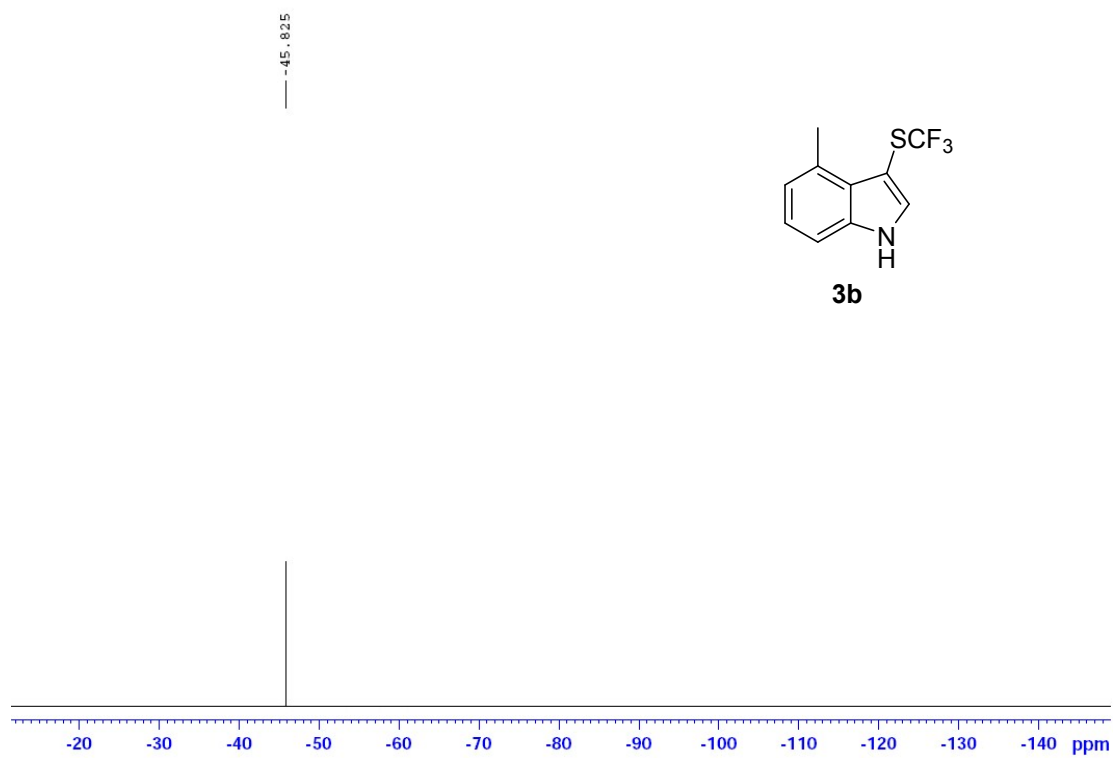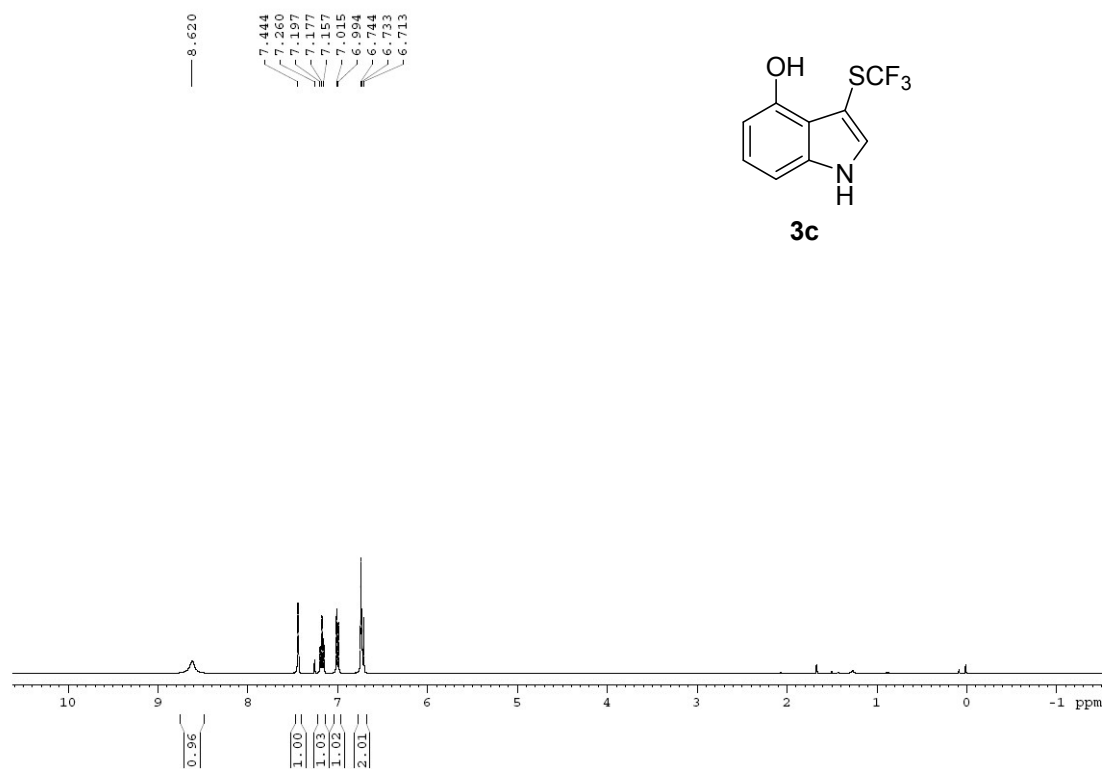

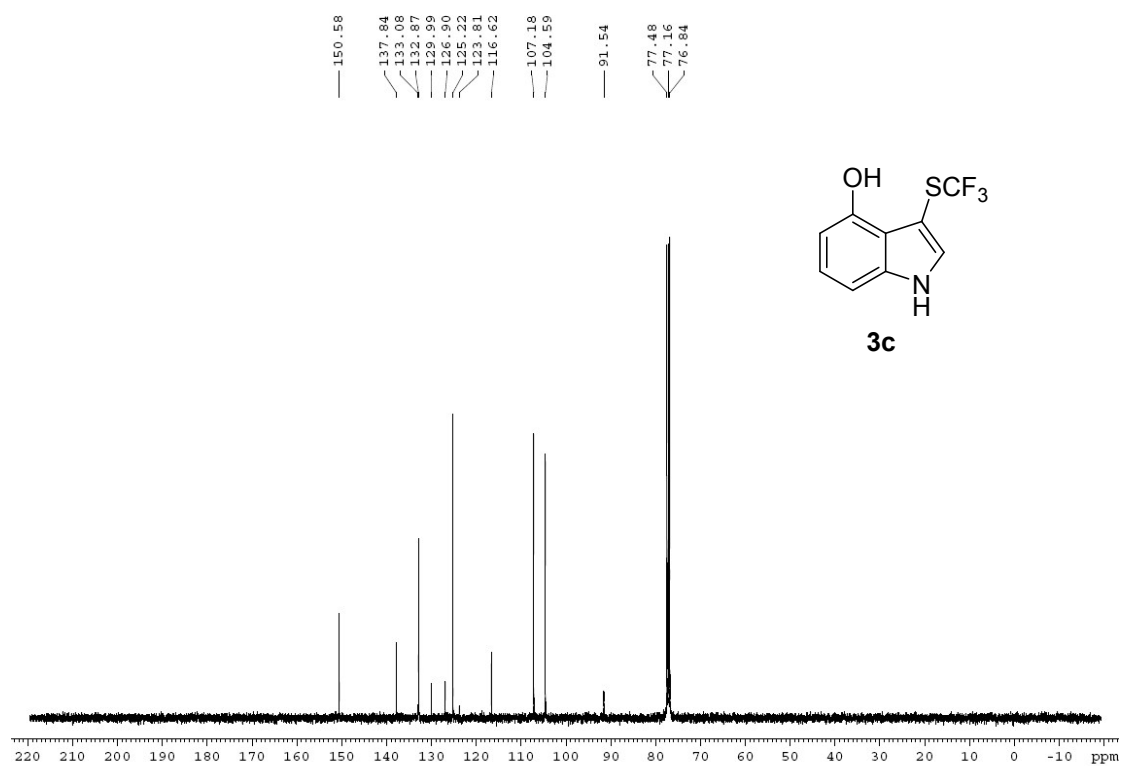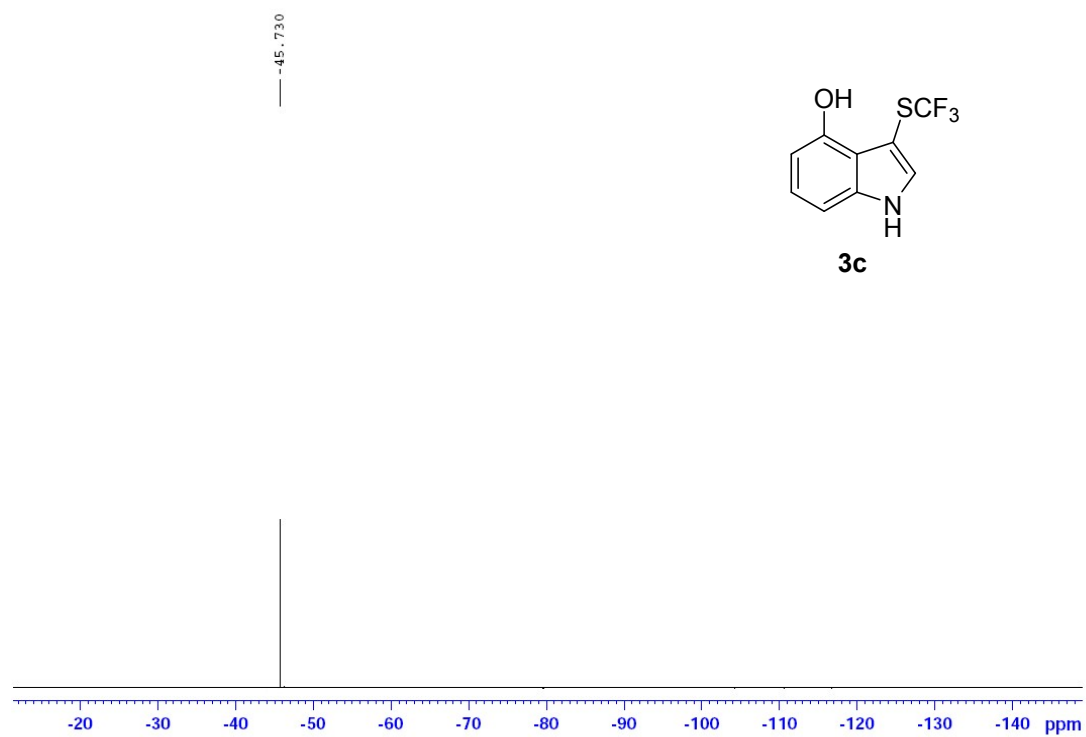

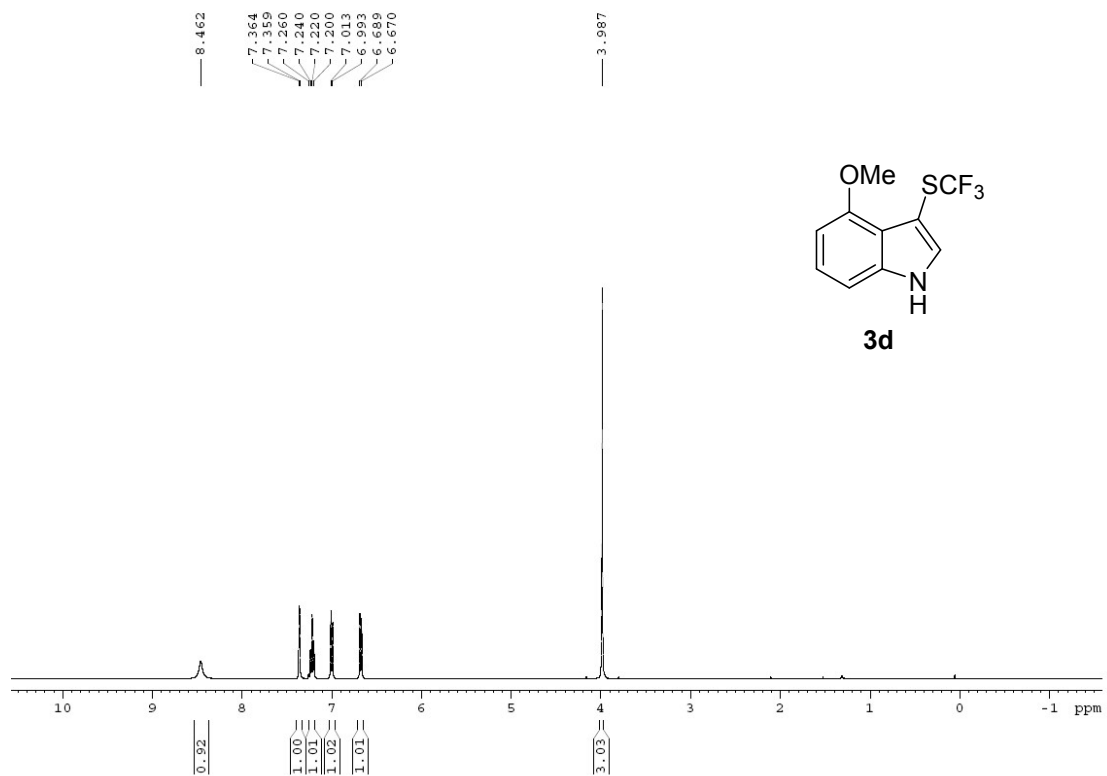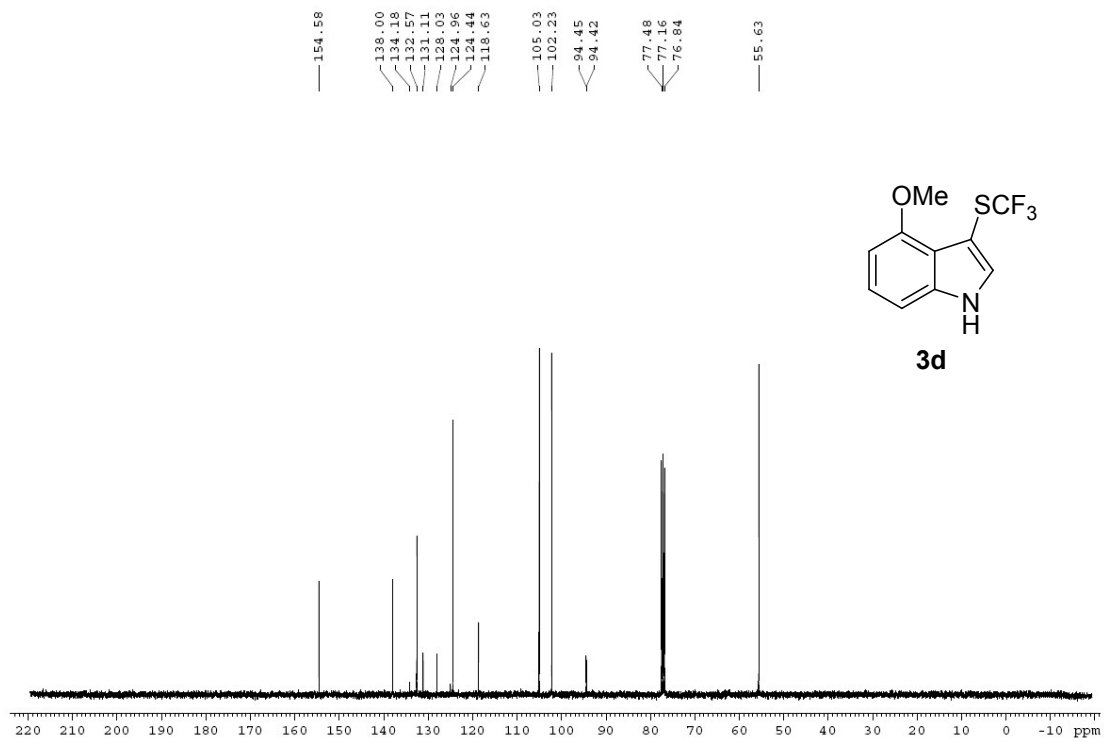

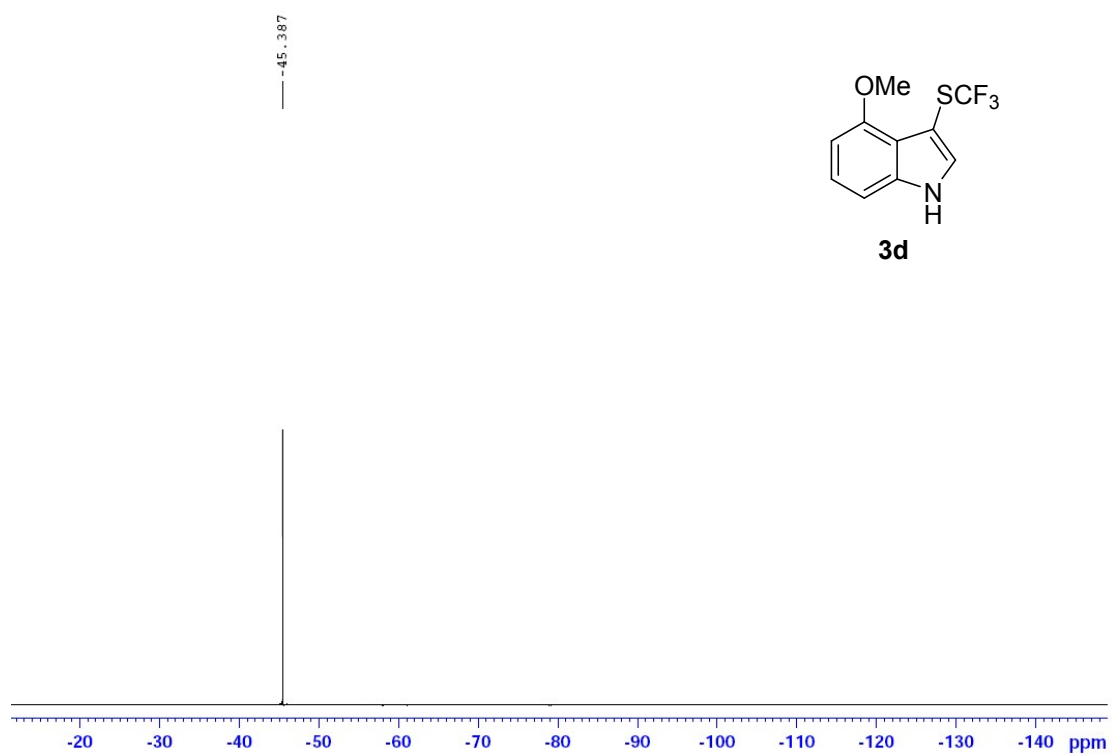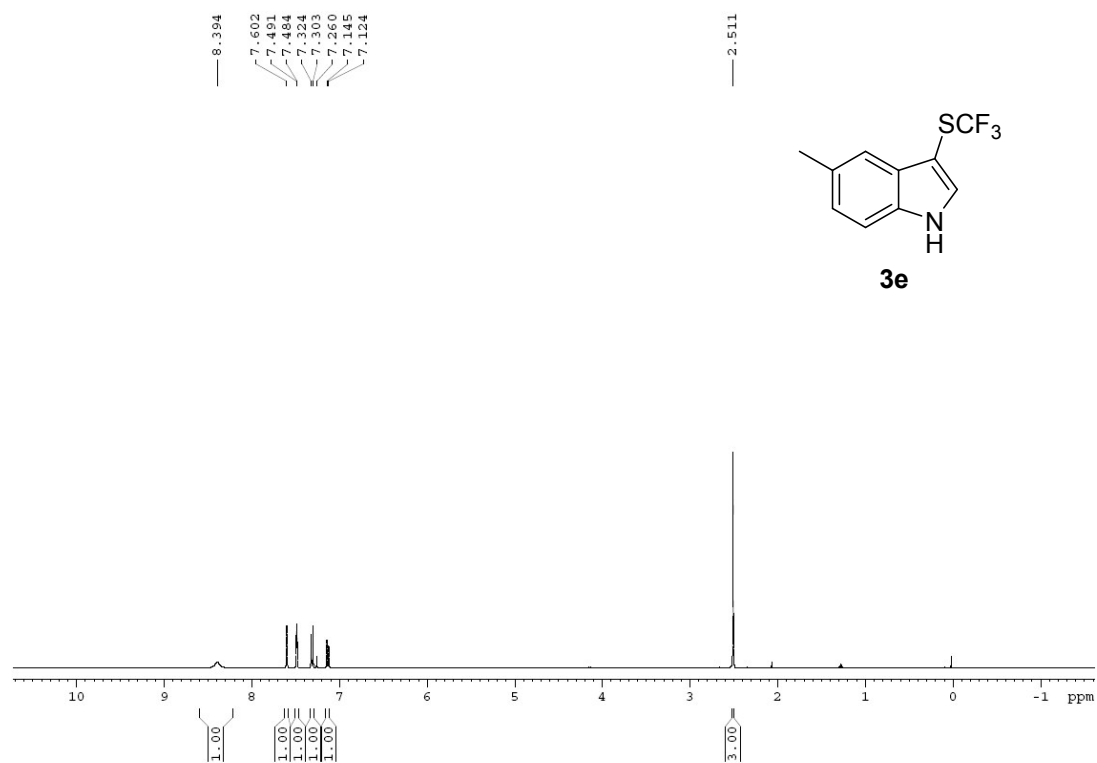

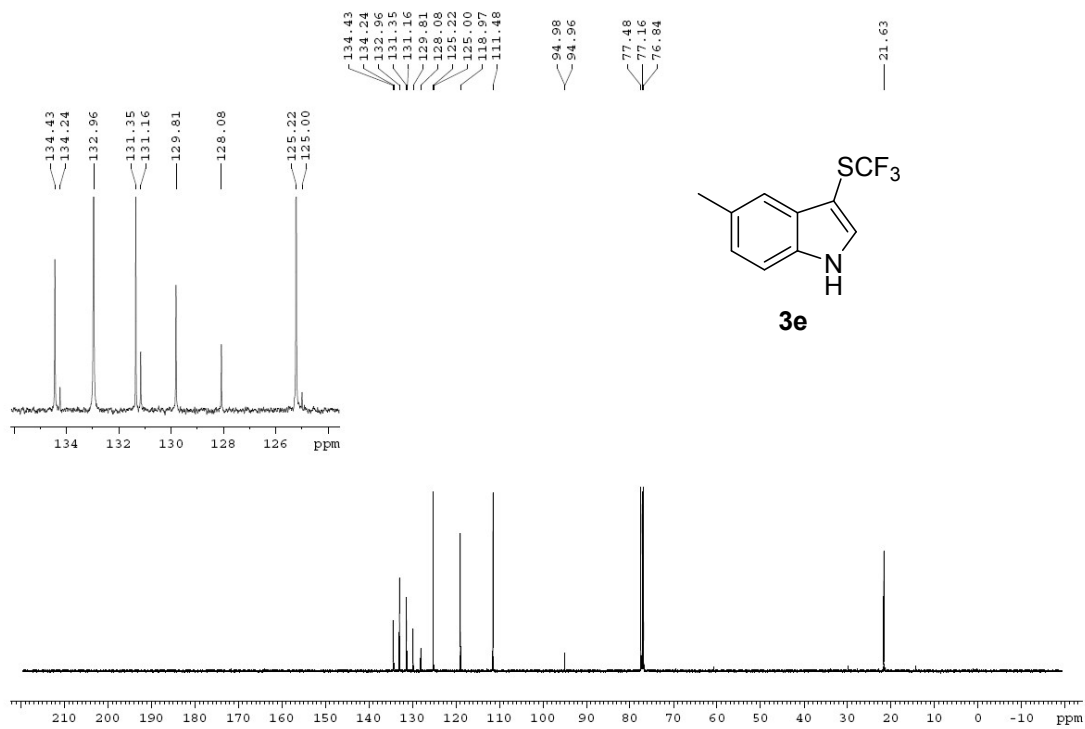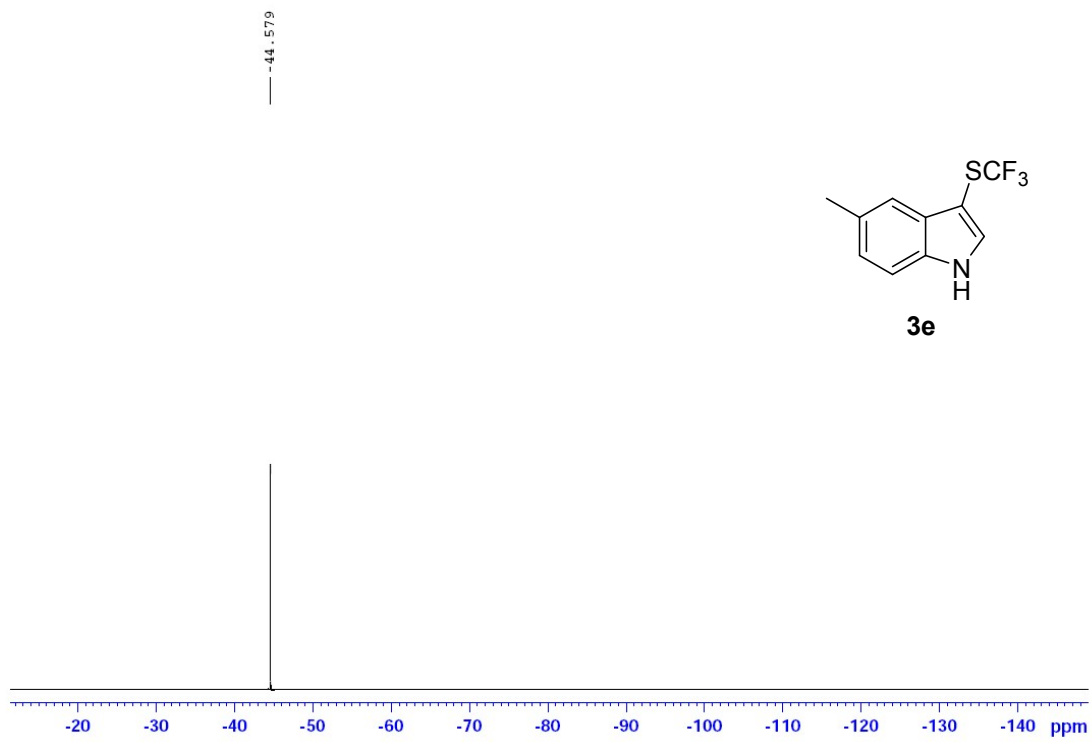



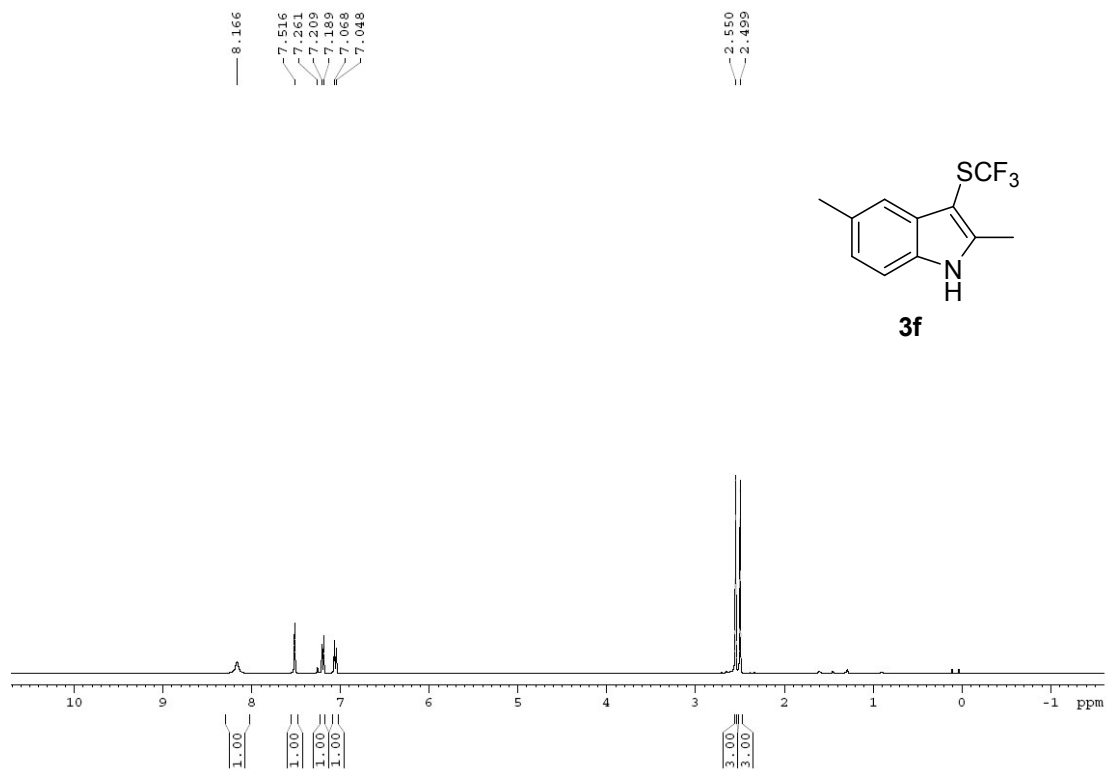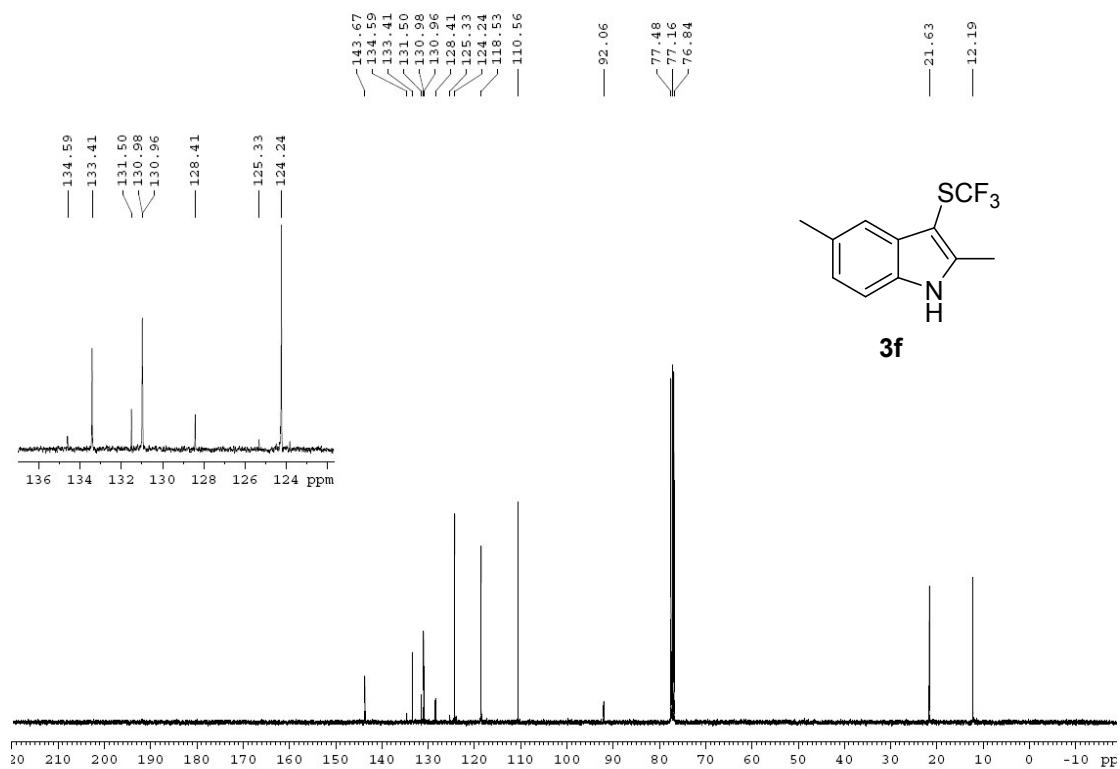

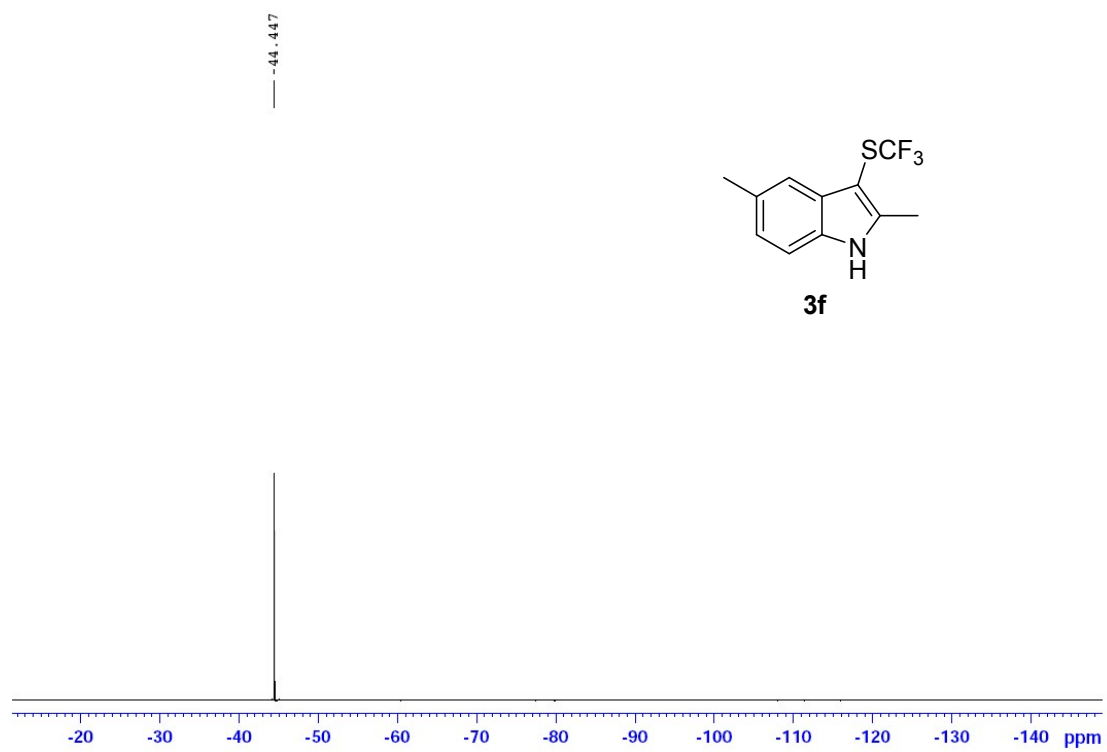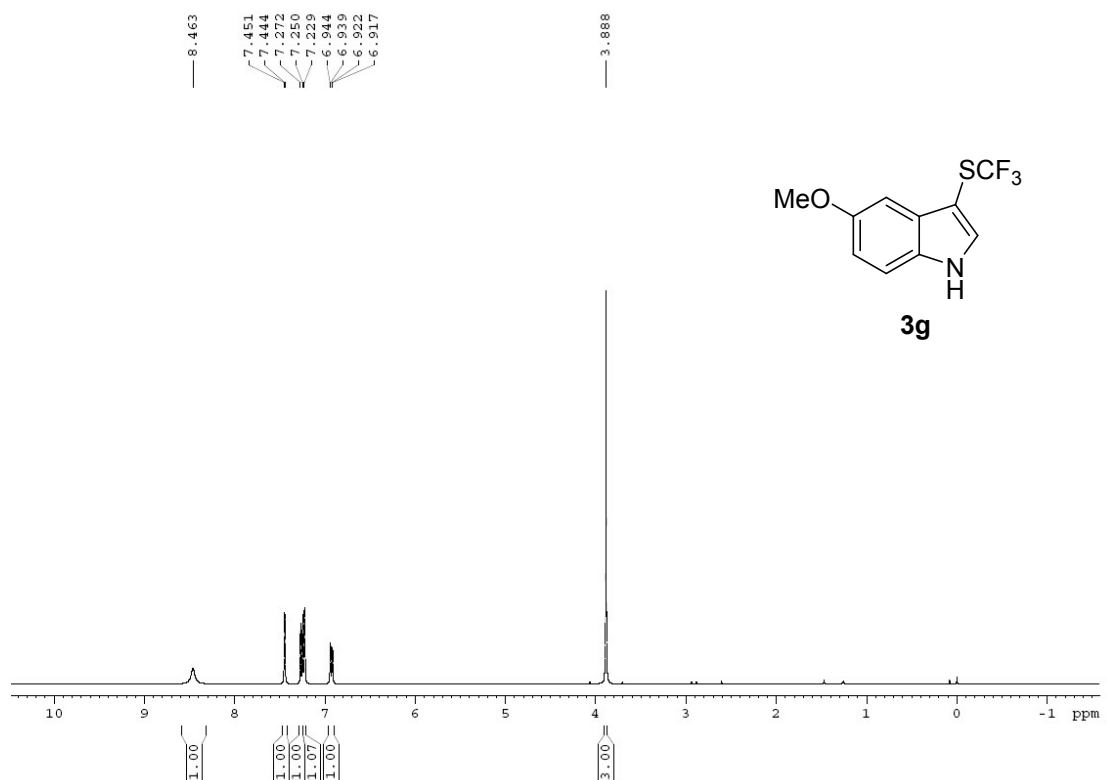

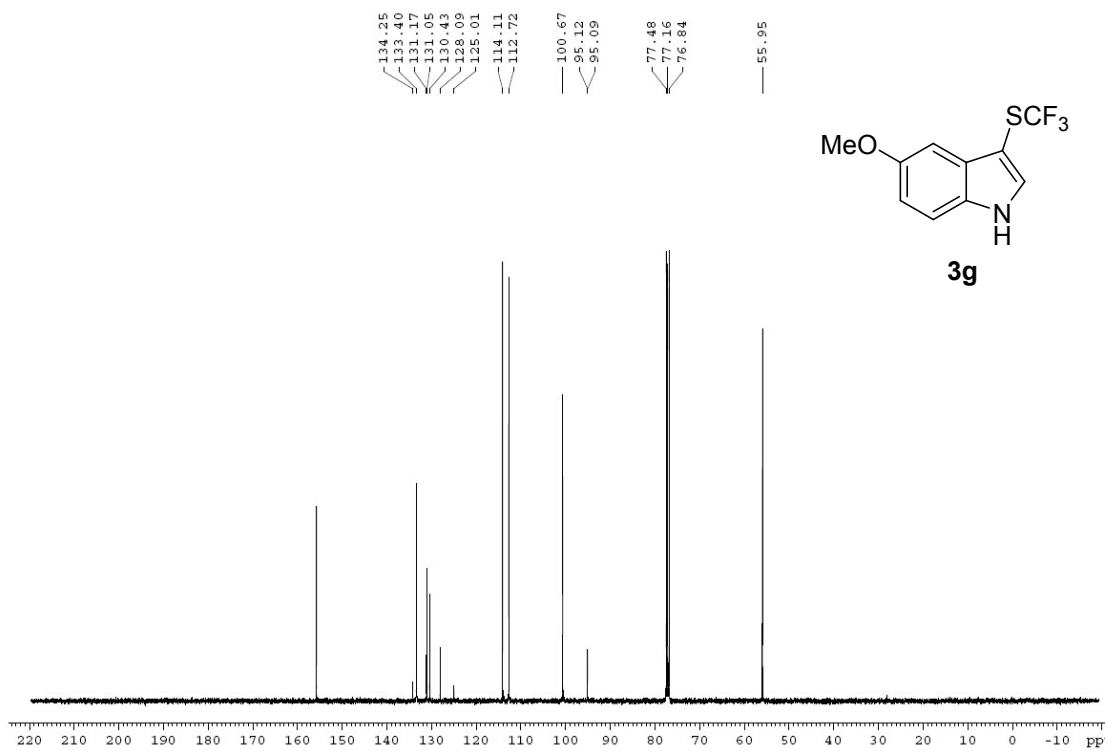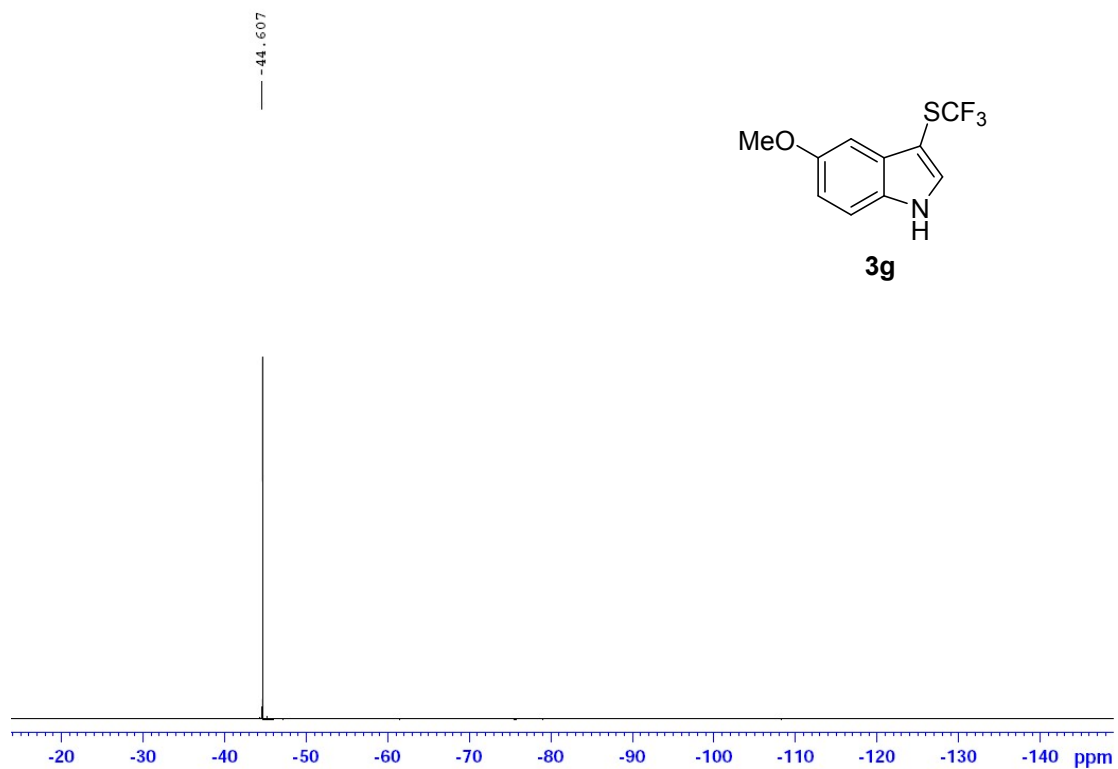

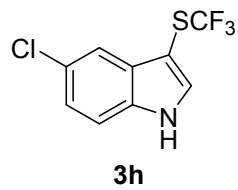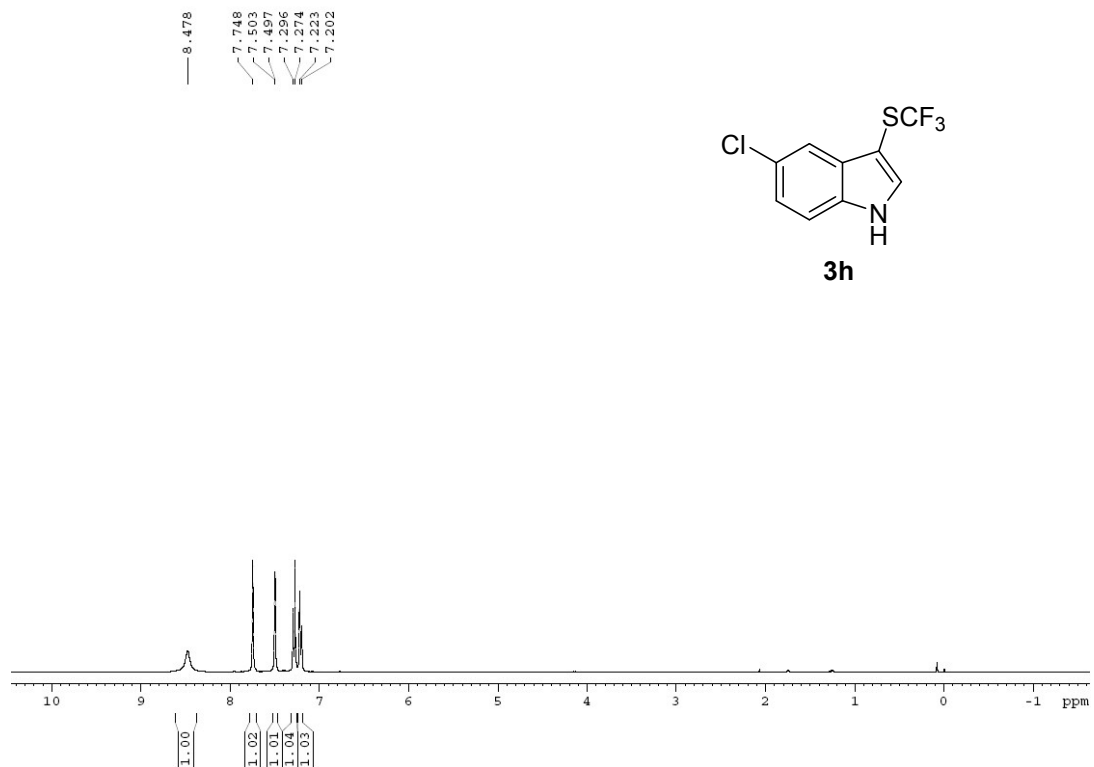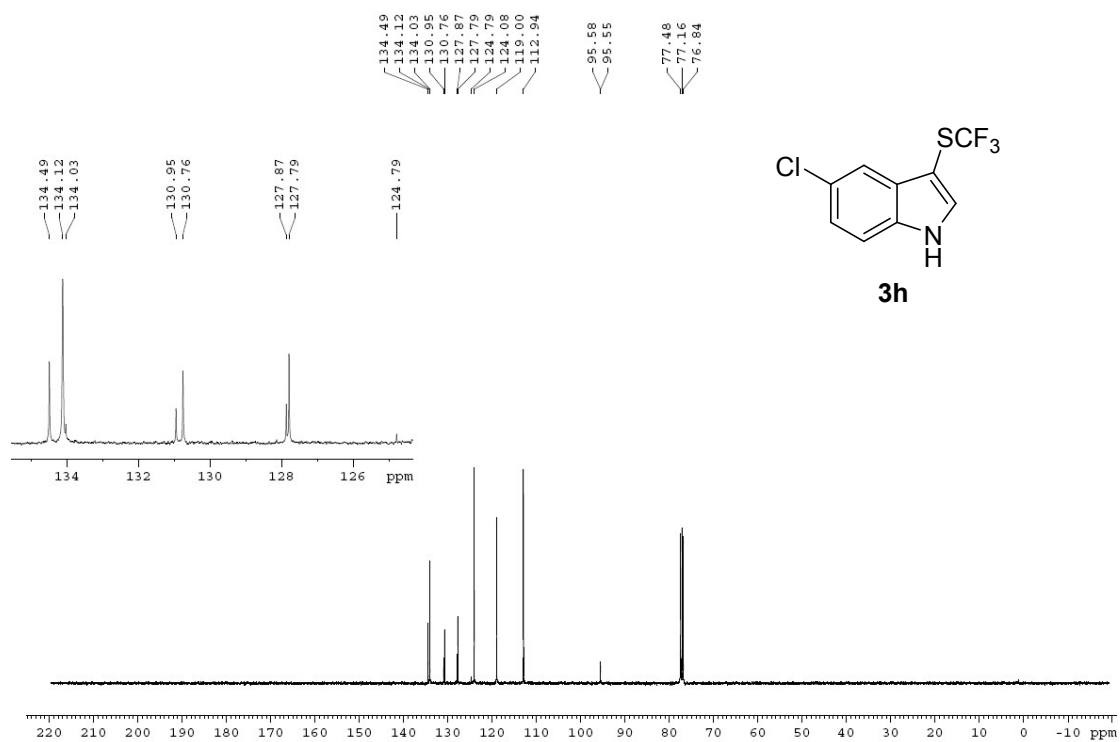

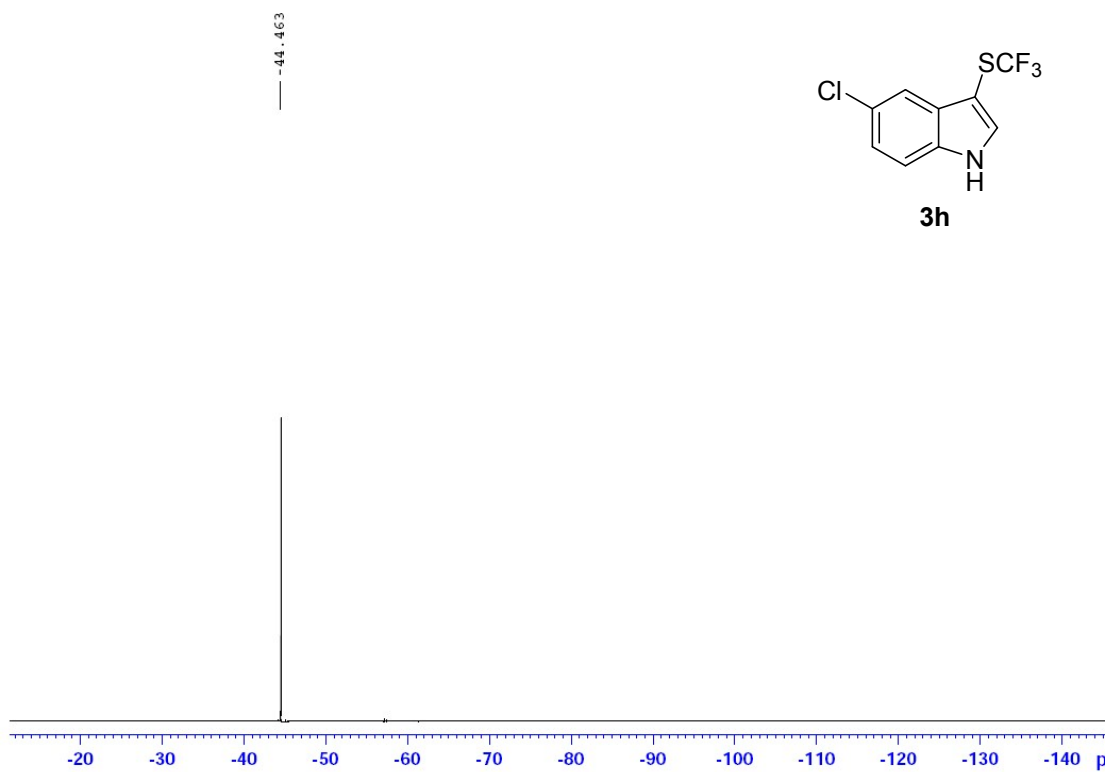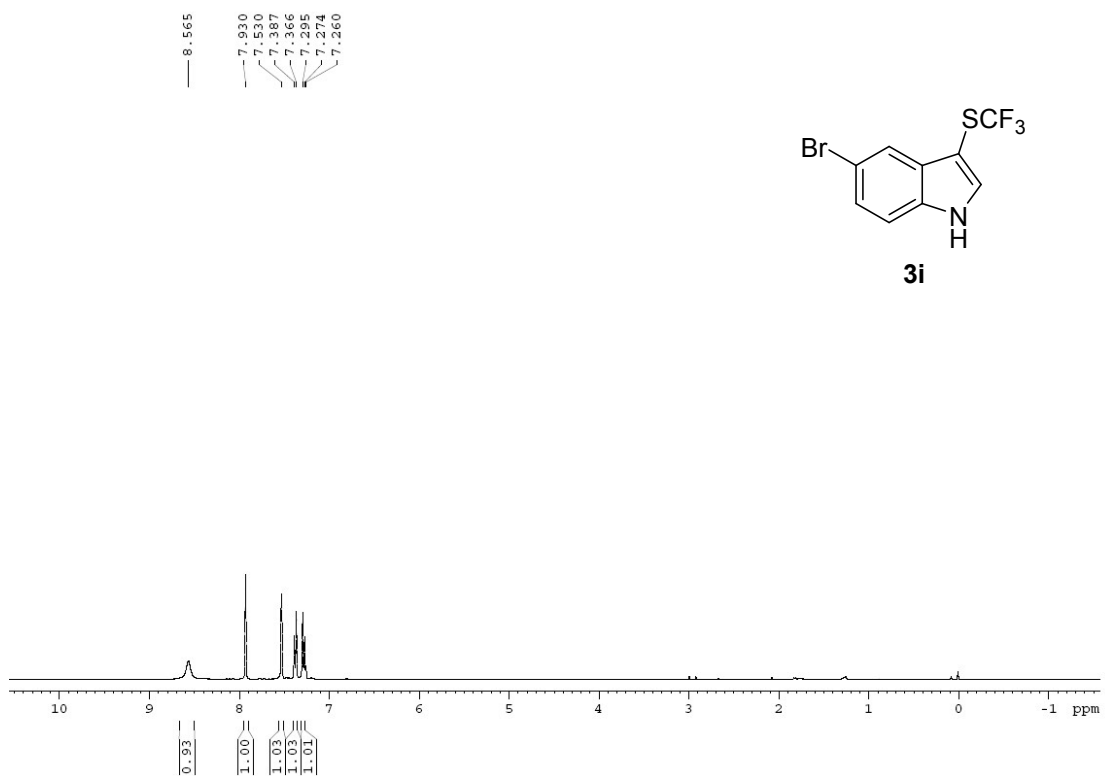

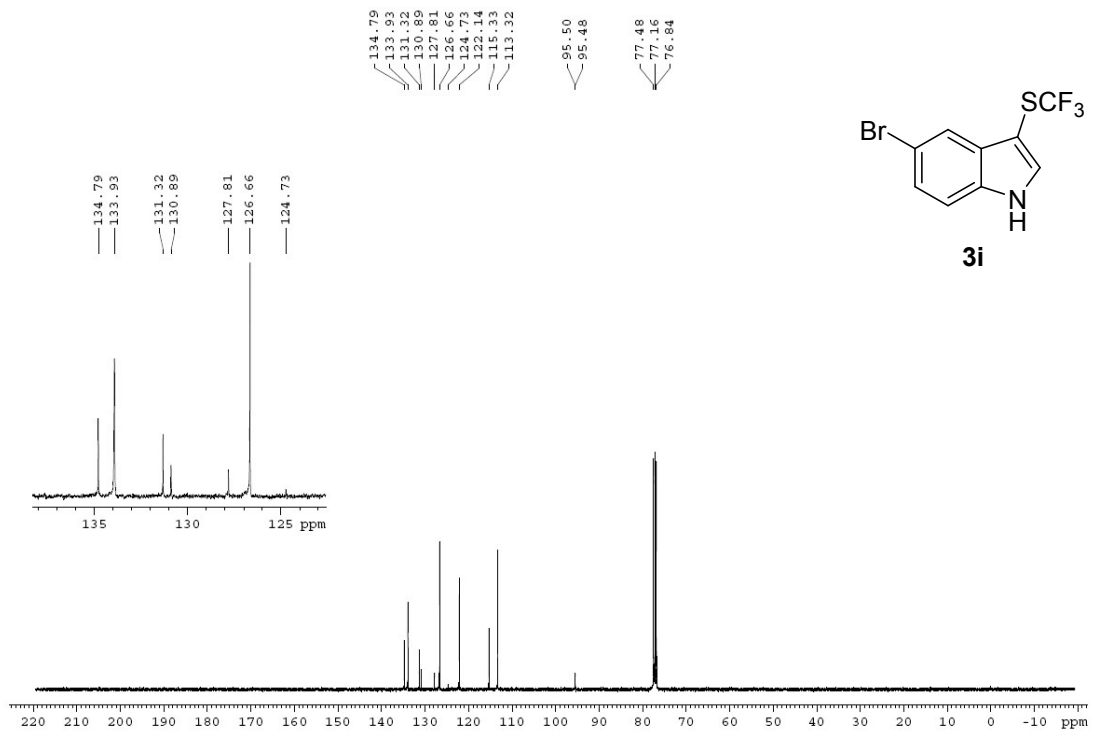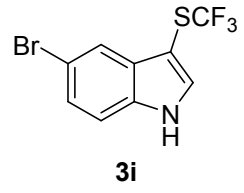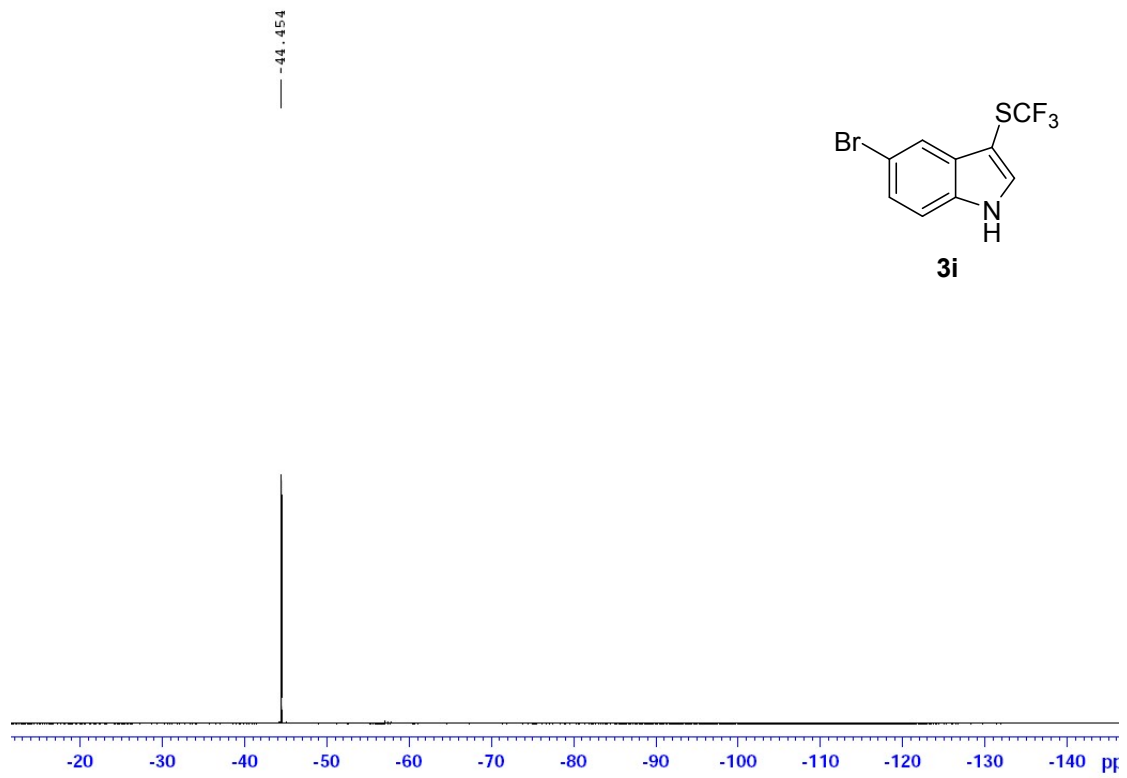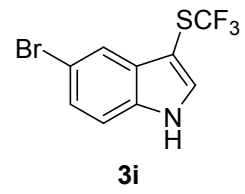

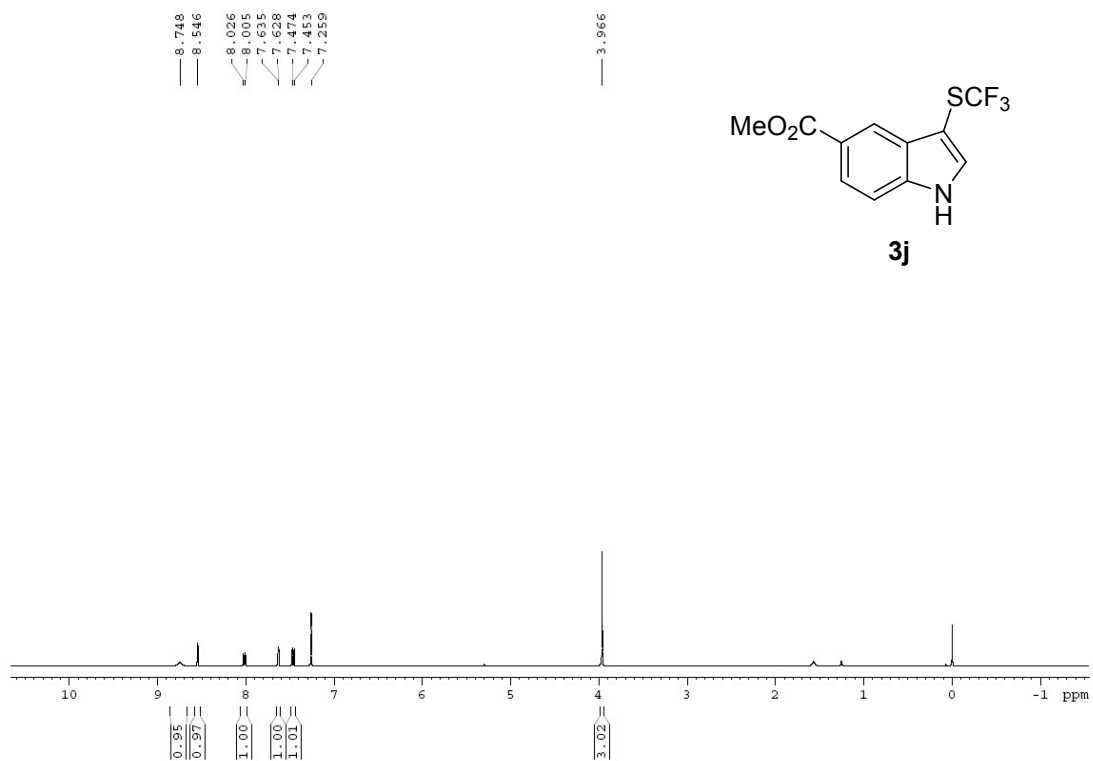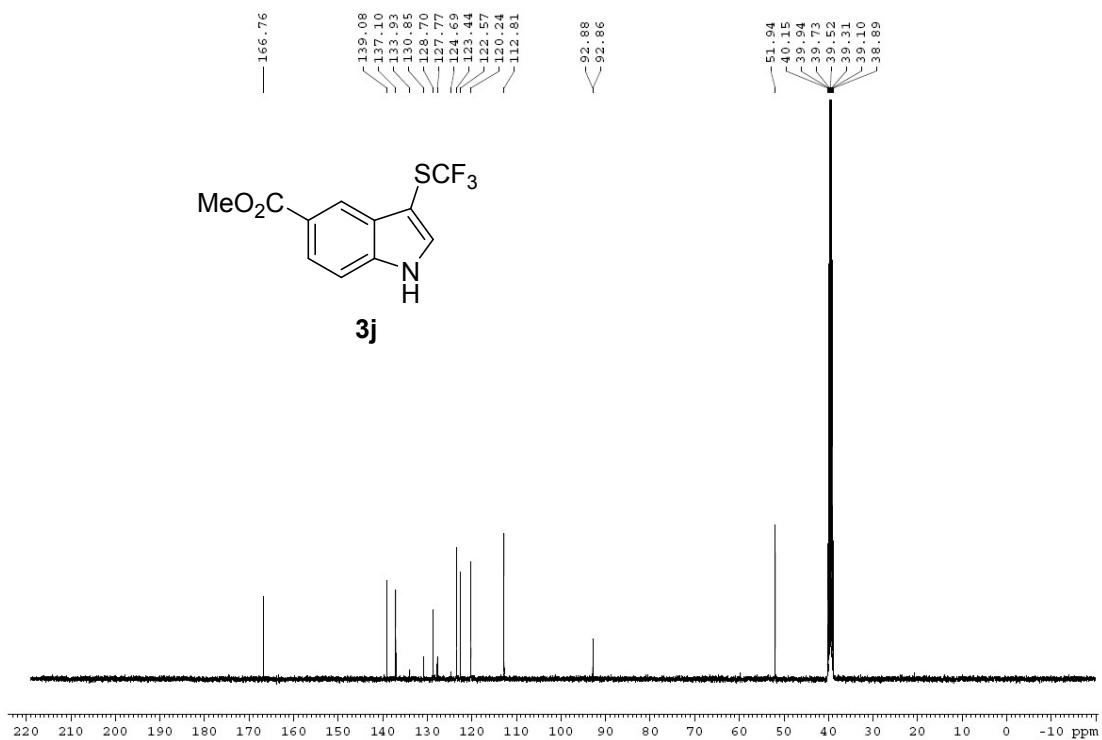

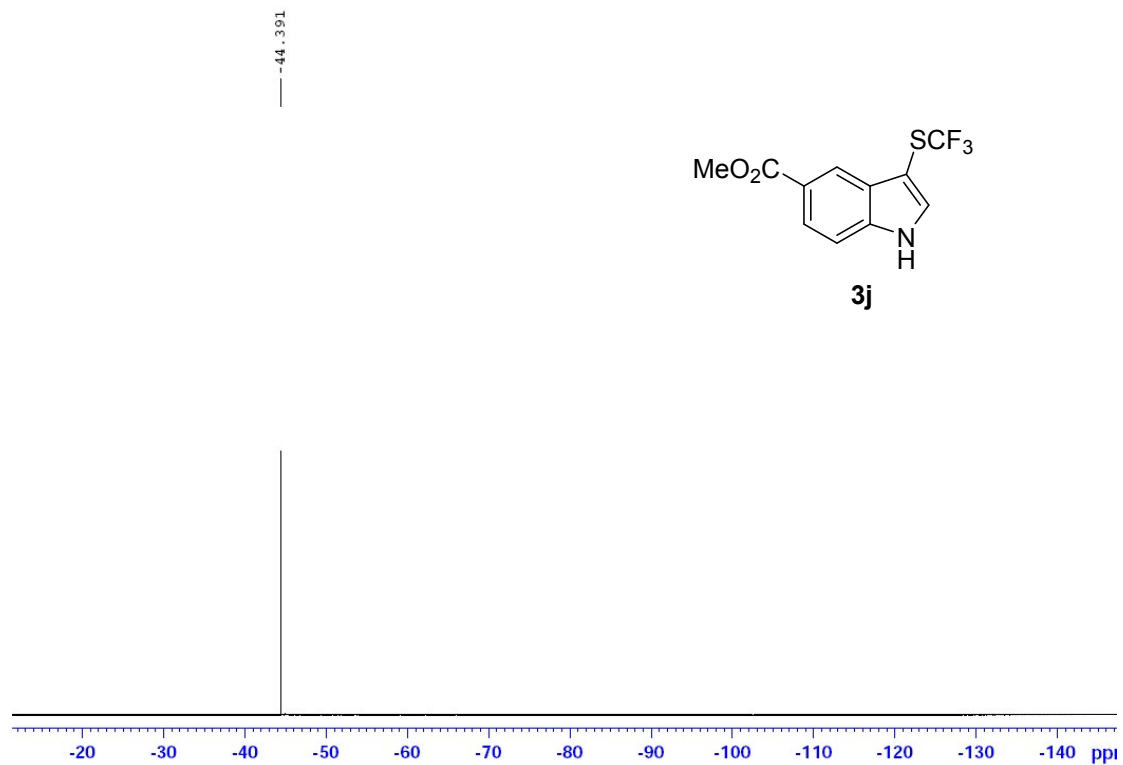

8.533  
7.571  
7.564  
7.472  
7.466  
7.449  
7.444  
7.364  
7.353  
7.342  
7.331  
7.260  
7.074  
7.067  
7.051  
7.045  
7.029  
7.023

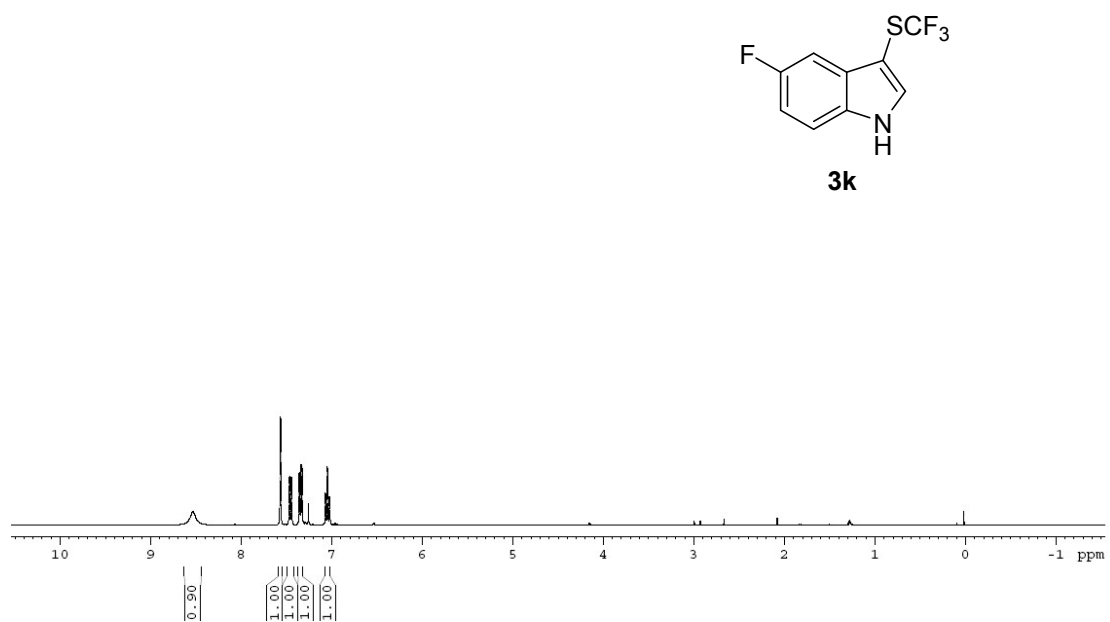



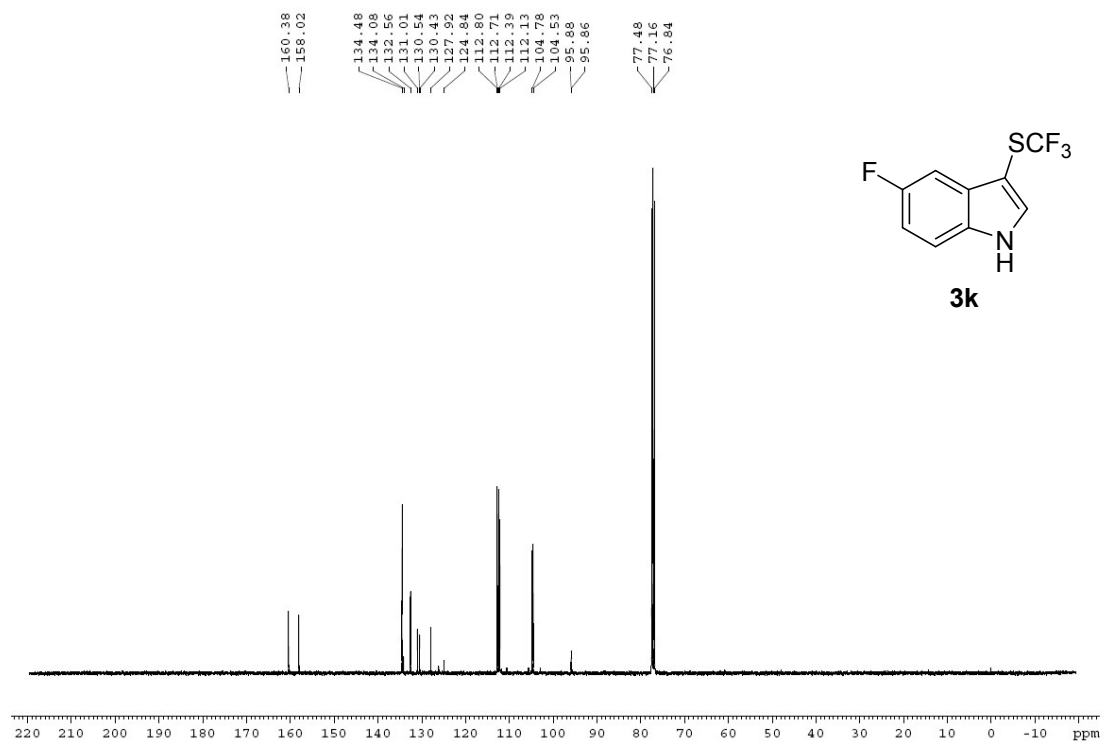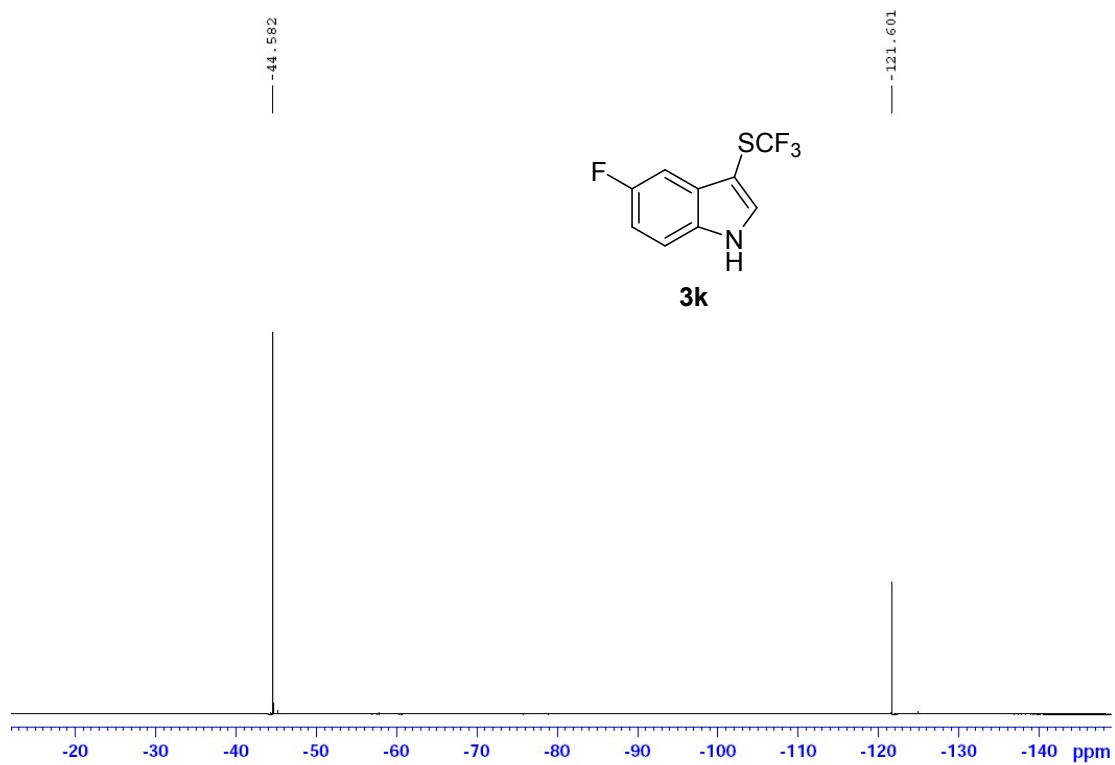

8.501  
7.742  
7.728  
7.720  
7.707  
7.523  
7.260  
7.125  
7.102  
7.076  
7.063  
7.030

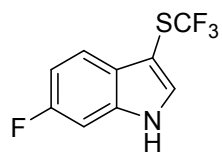

**3I**

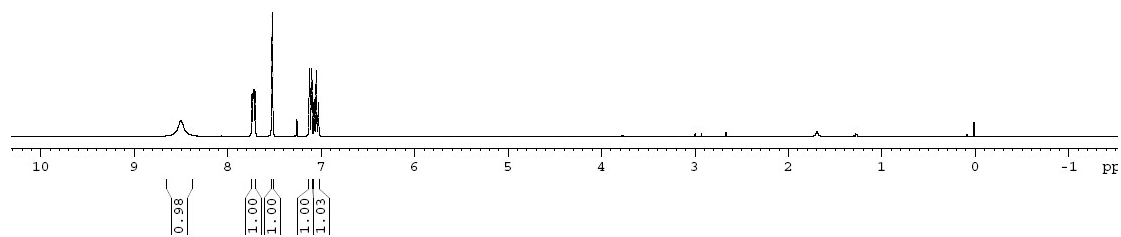

161.86  
159.47  
136.16  
136.03  
134.12  
133.27  
133.25  
131.04  
127.96  
126.03  
124.88  
120.57  
120.47  
110.82  
110.58  
98.37  
98.10  
96.06  
96.04  
77.48  
77.16  
76.84

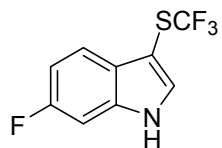

**3I**

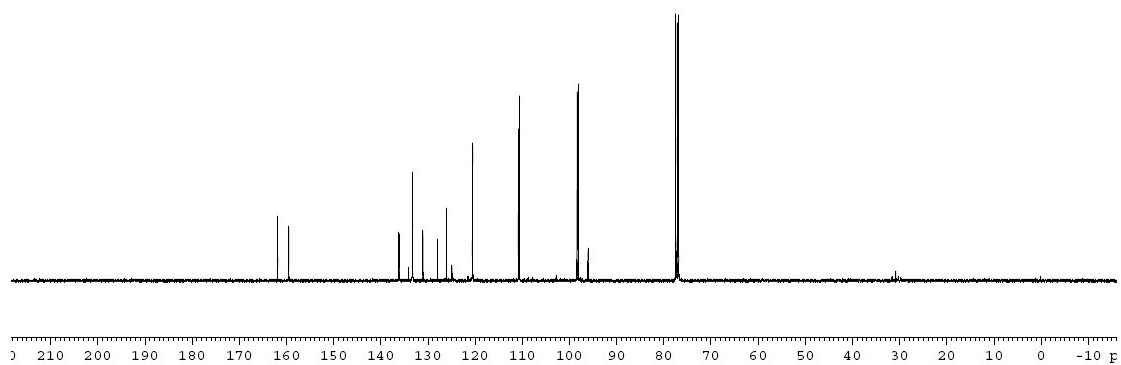

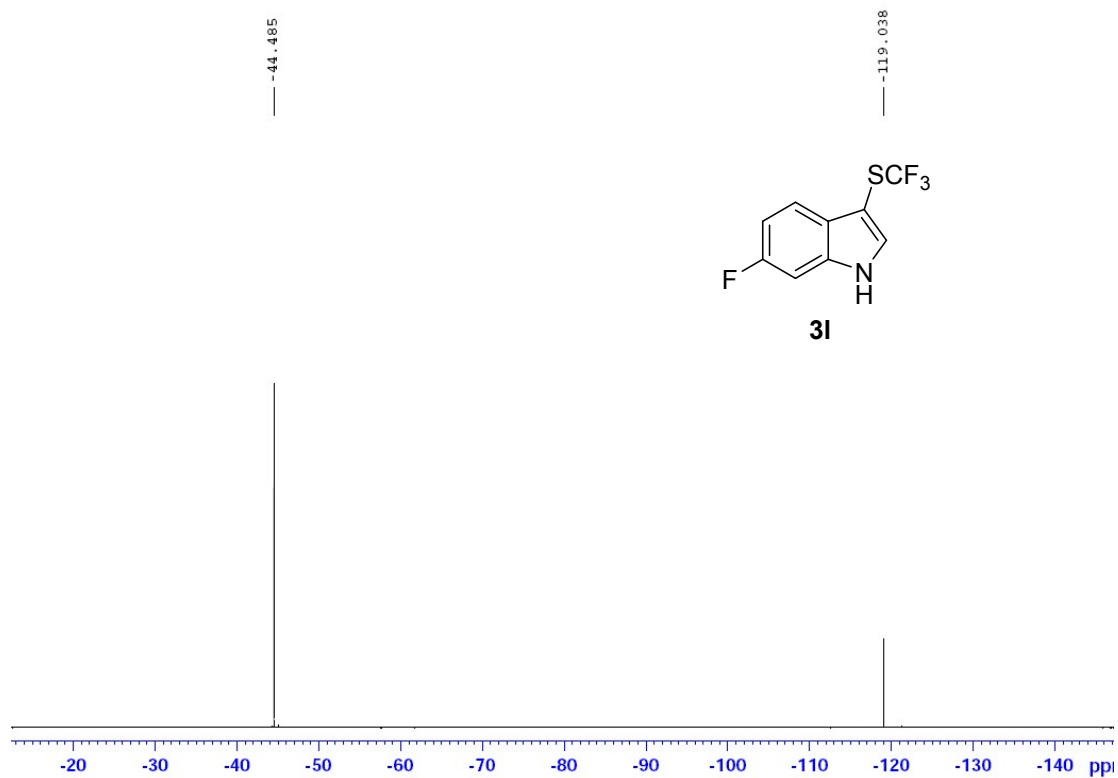

8.4456  
7.725  
7.704  
7.518  
7.511  
7.404  
7.401  
7.270  
7.267  
7.260  
7.249  
7.246

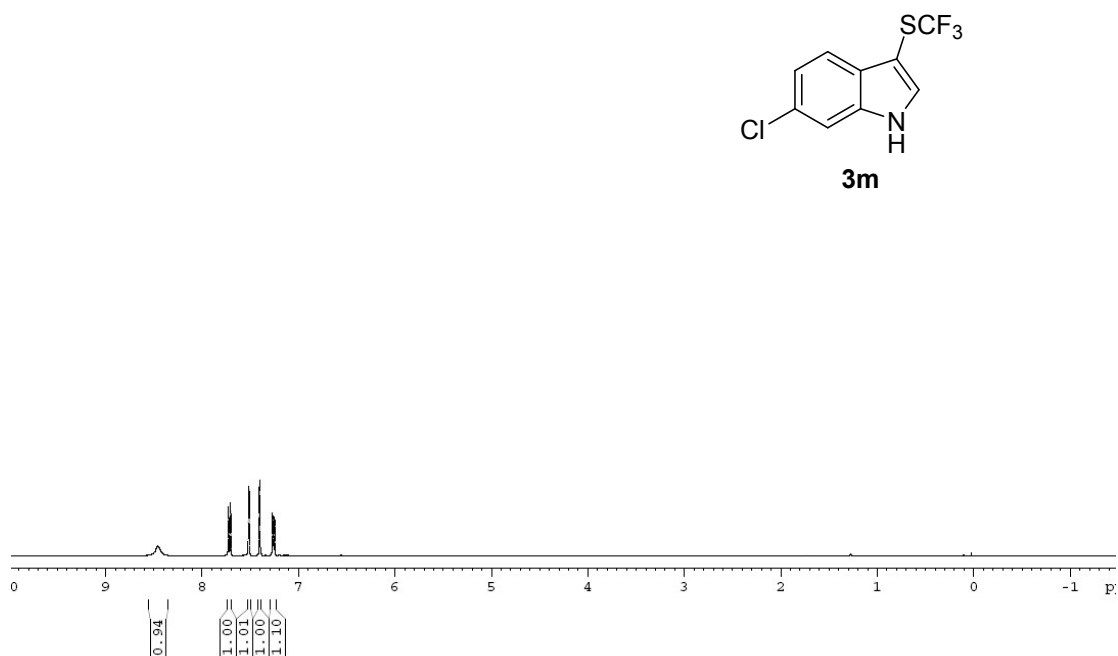

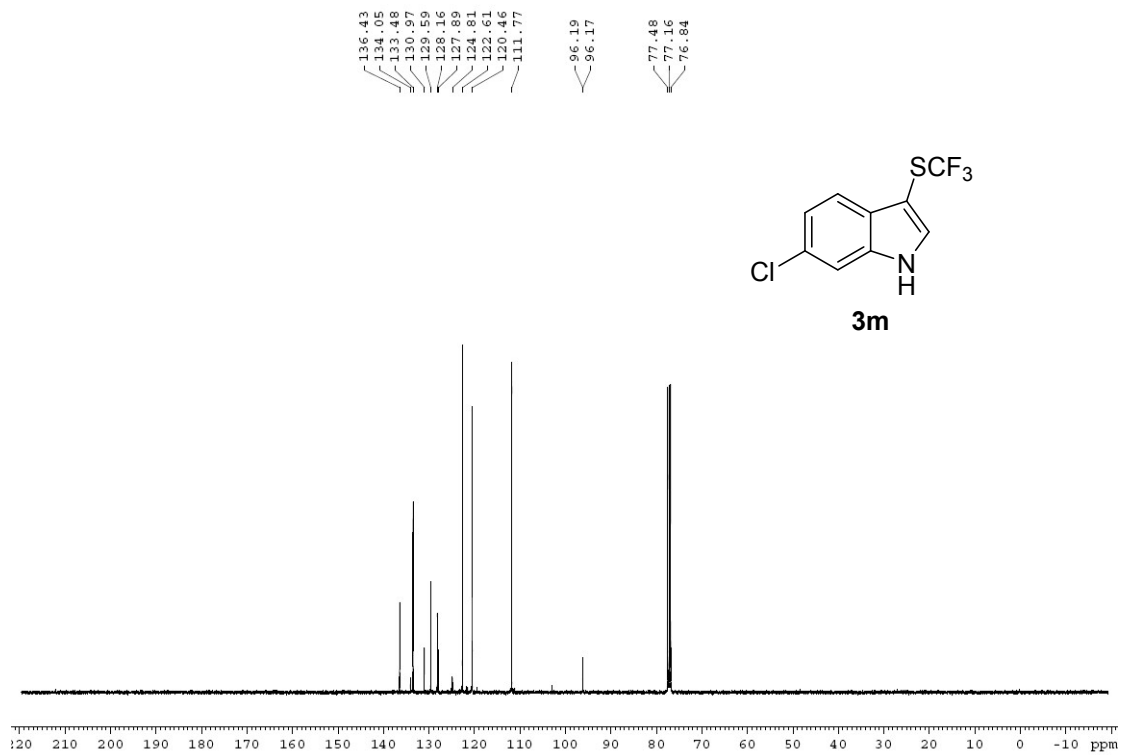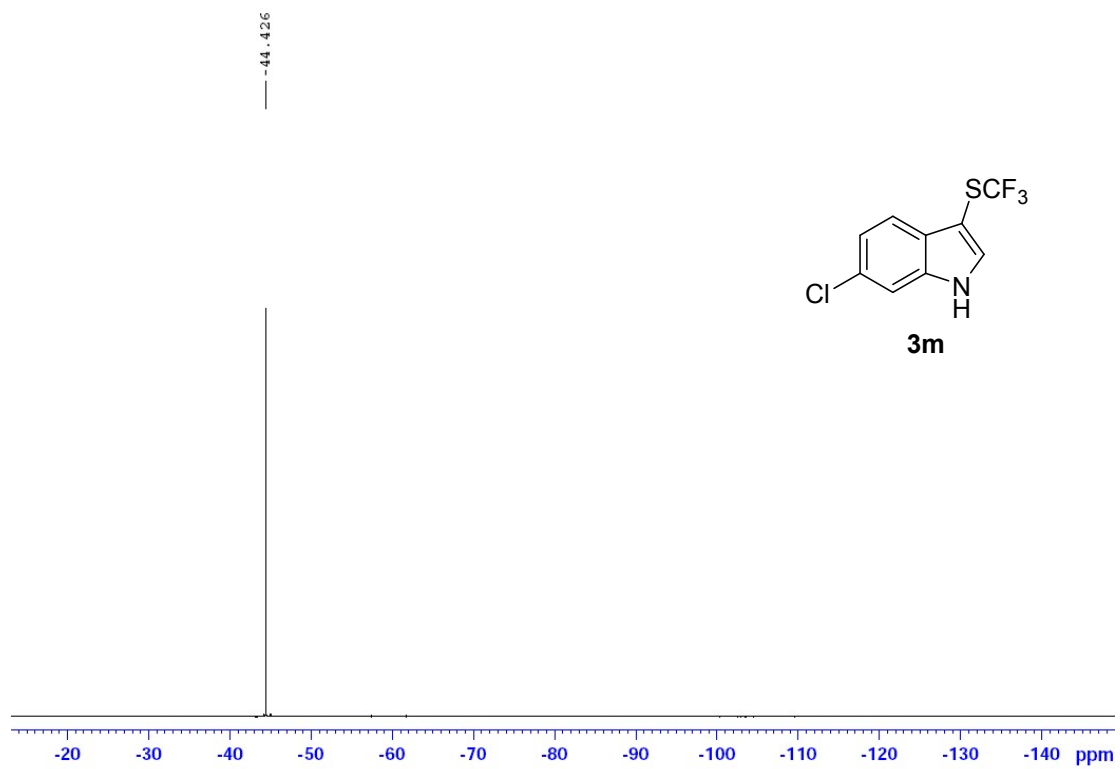

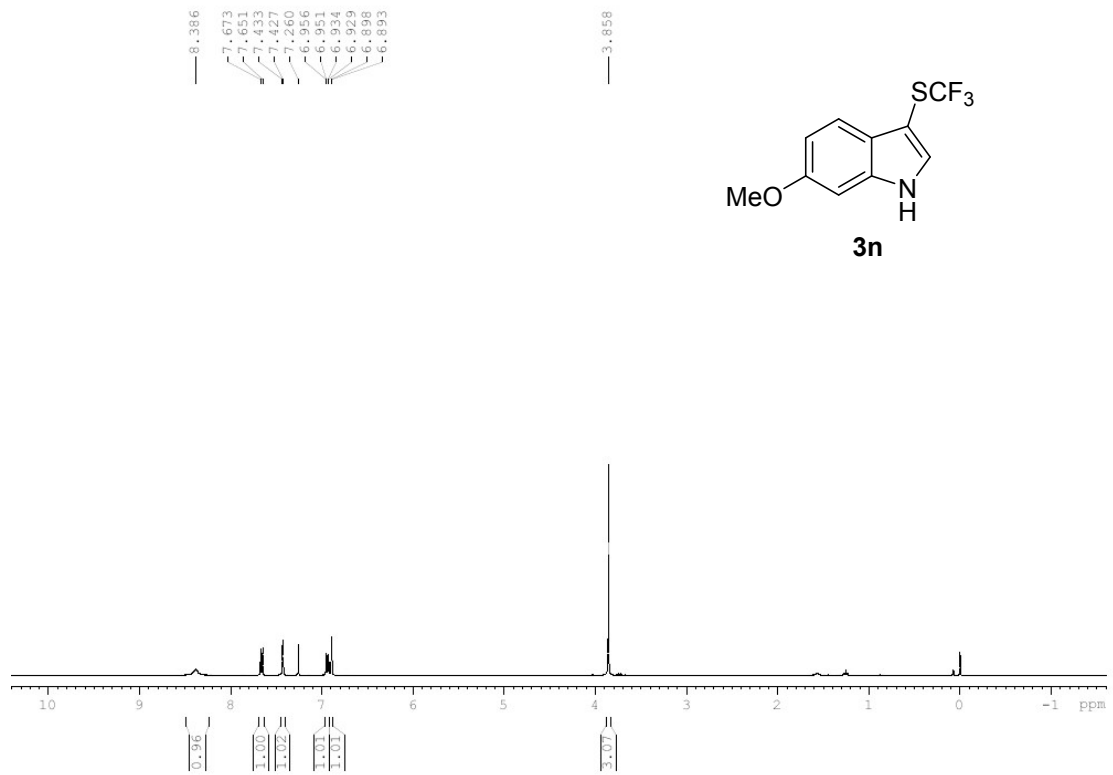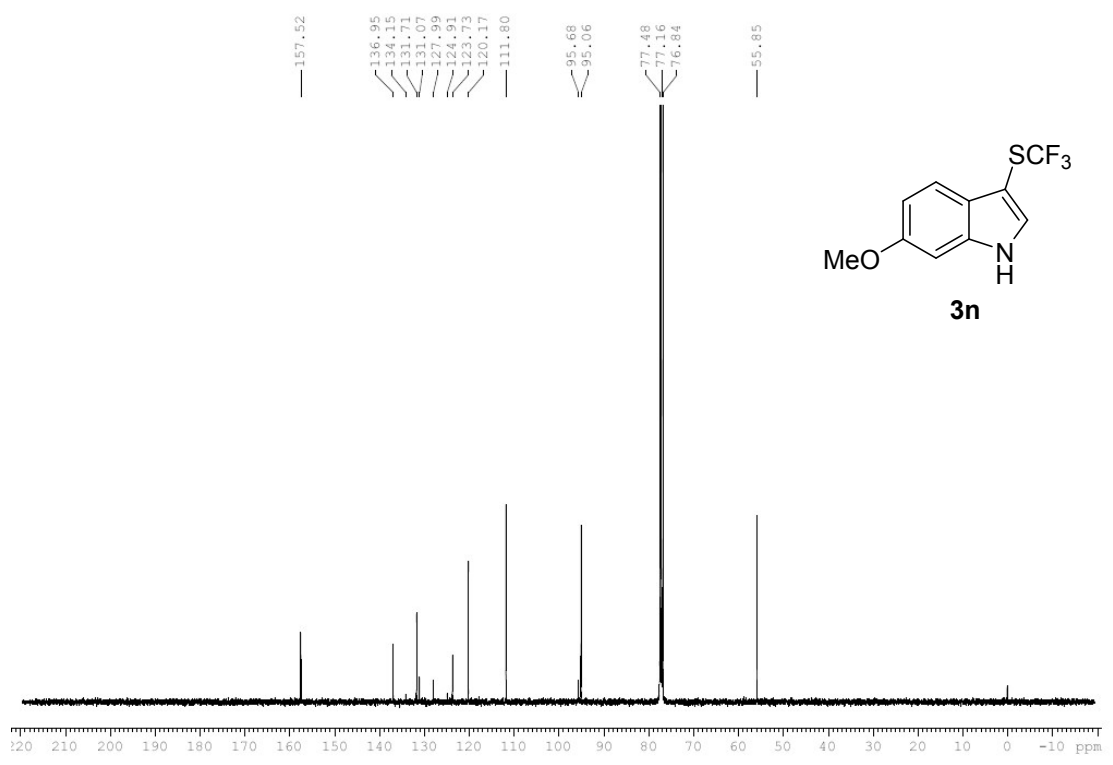

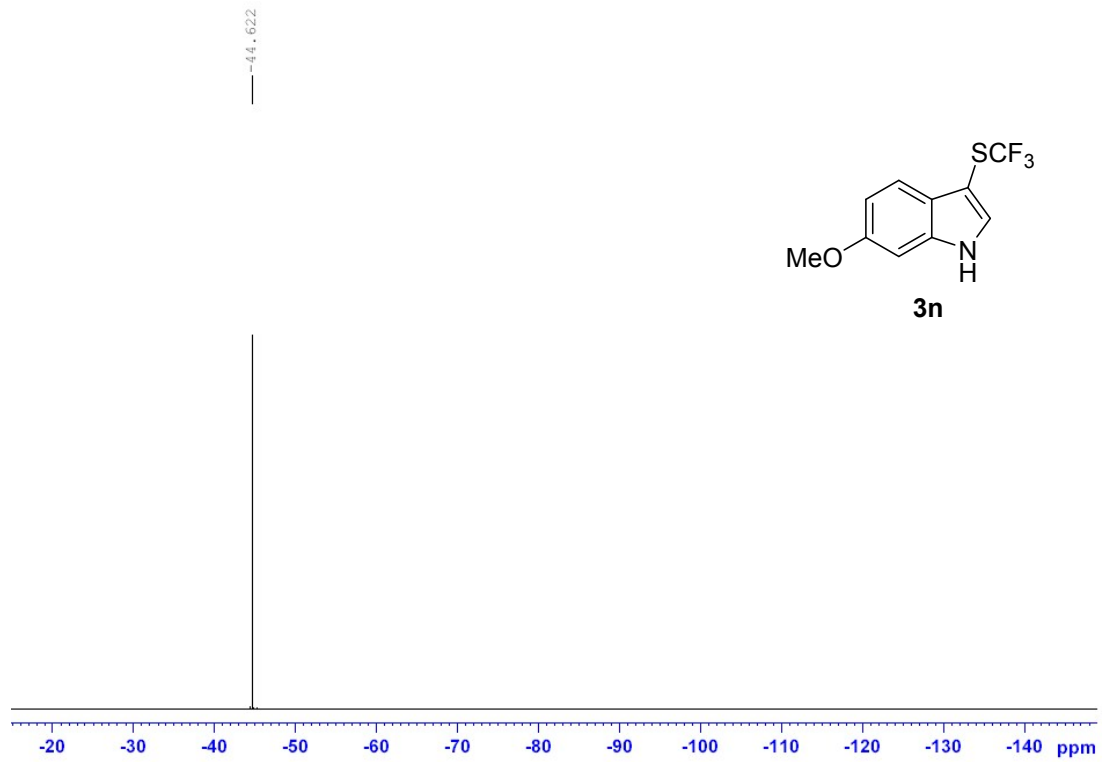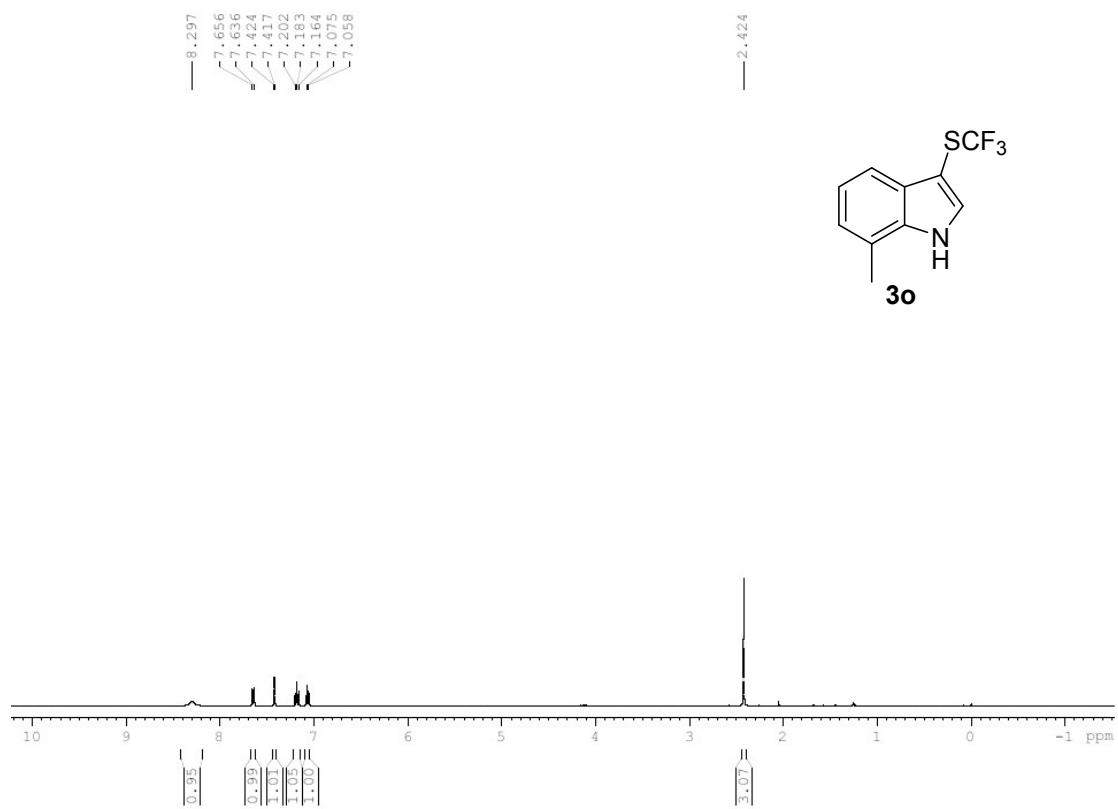

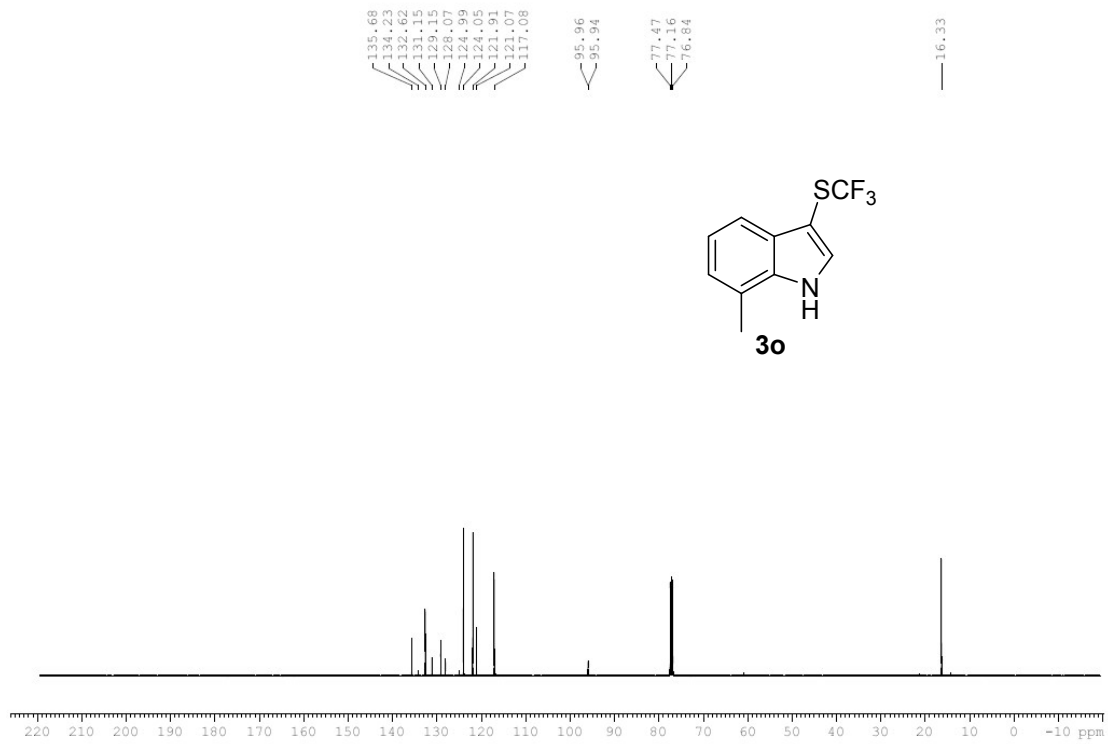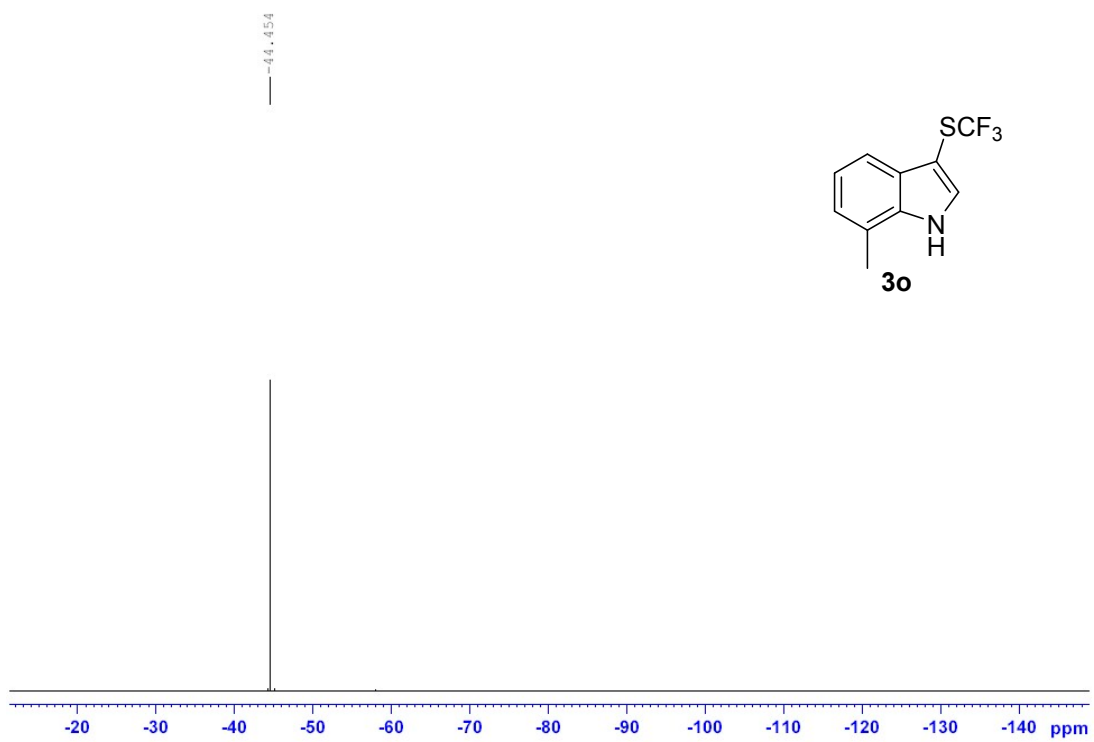

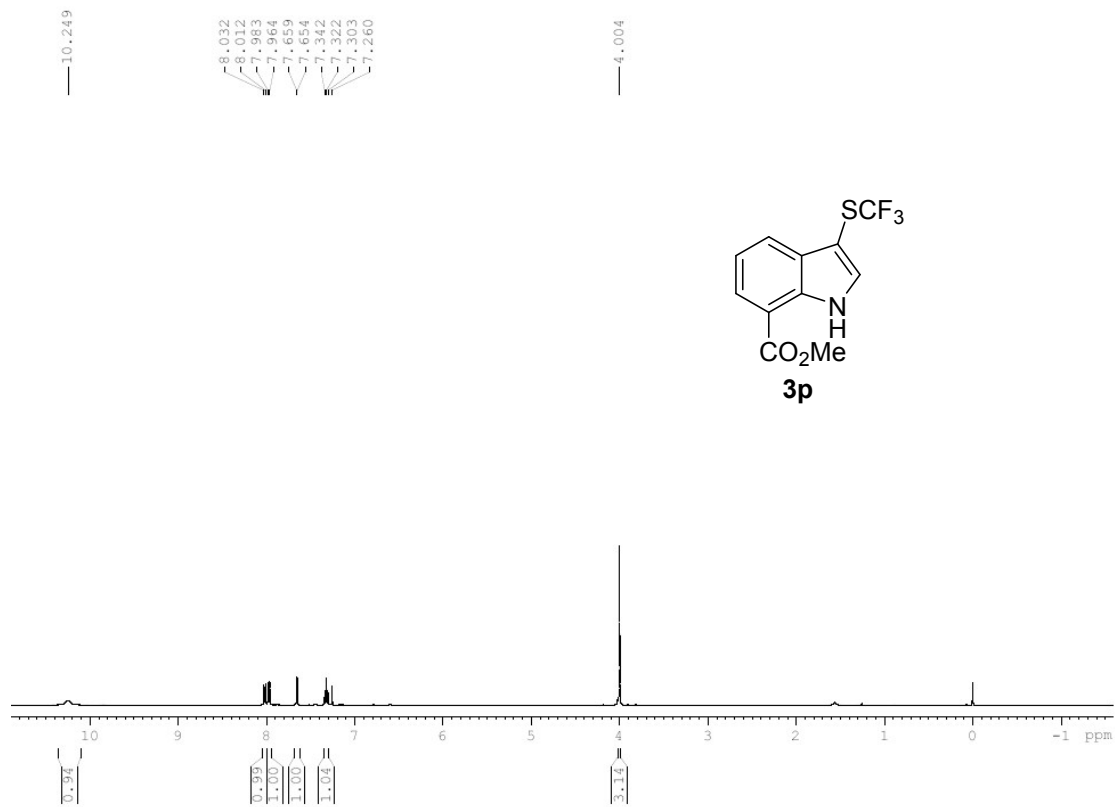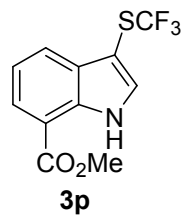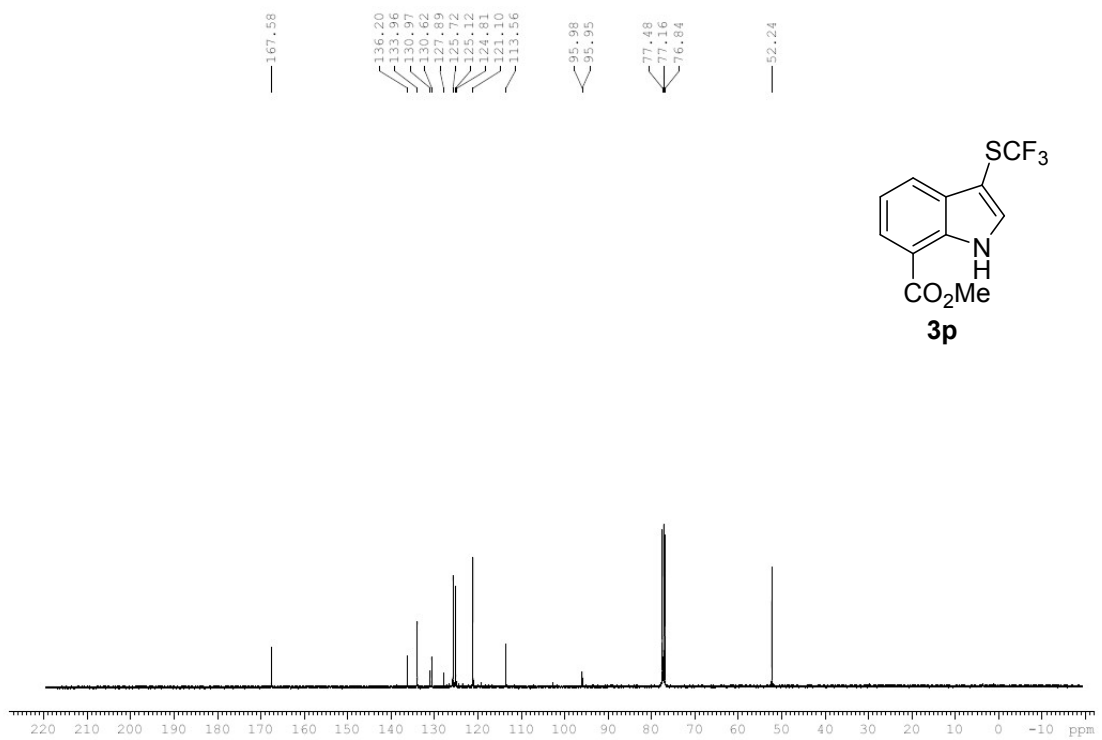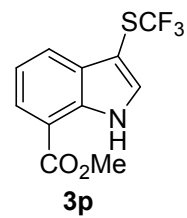



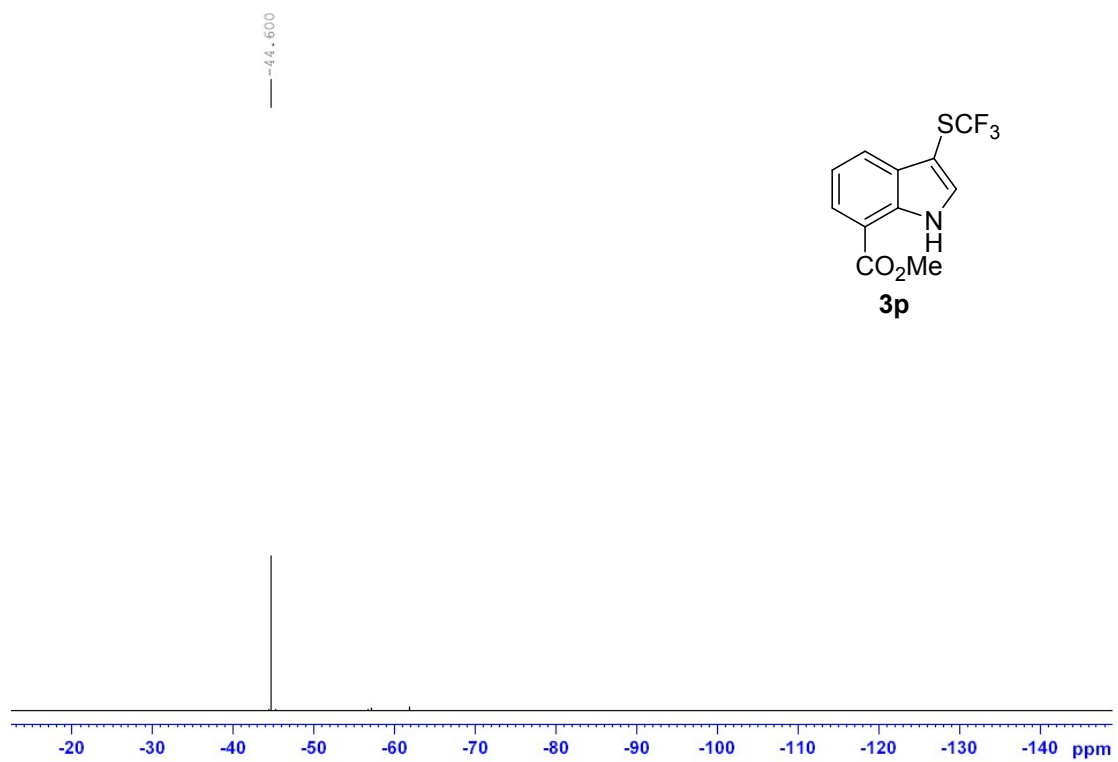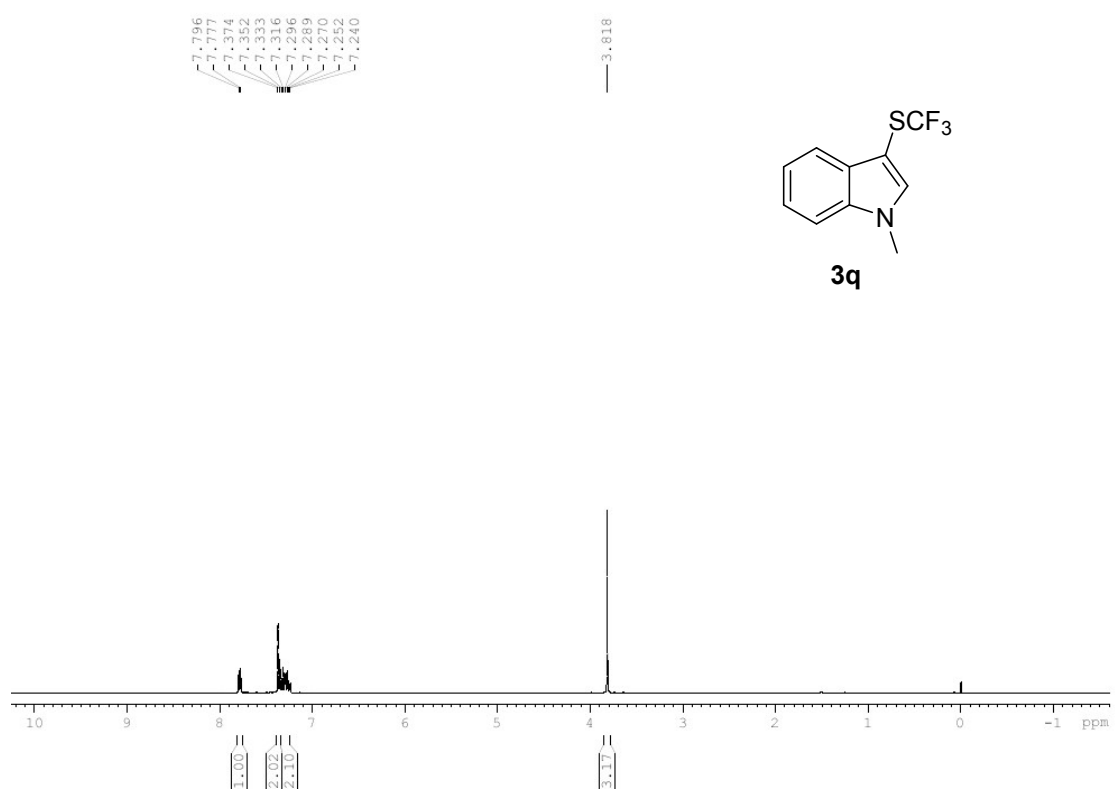

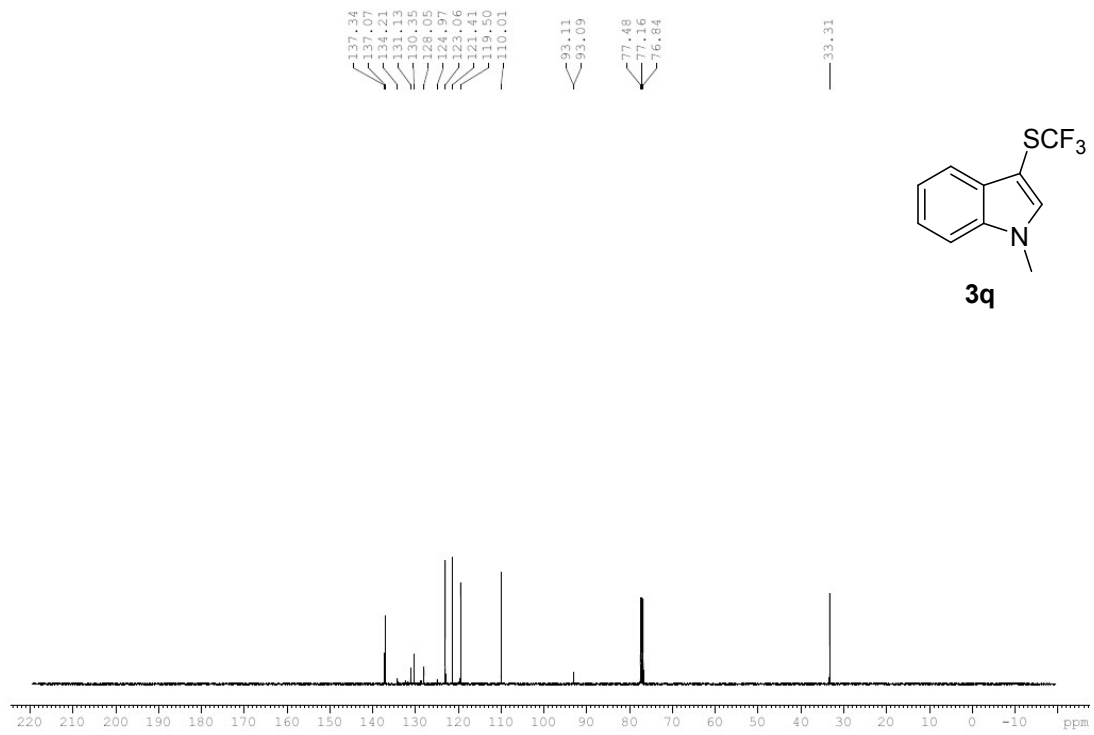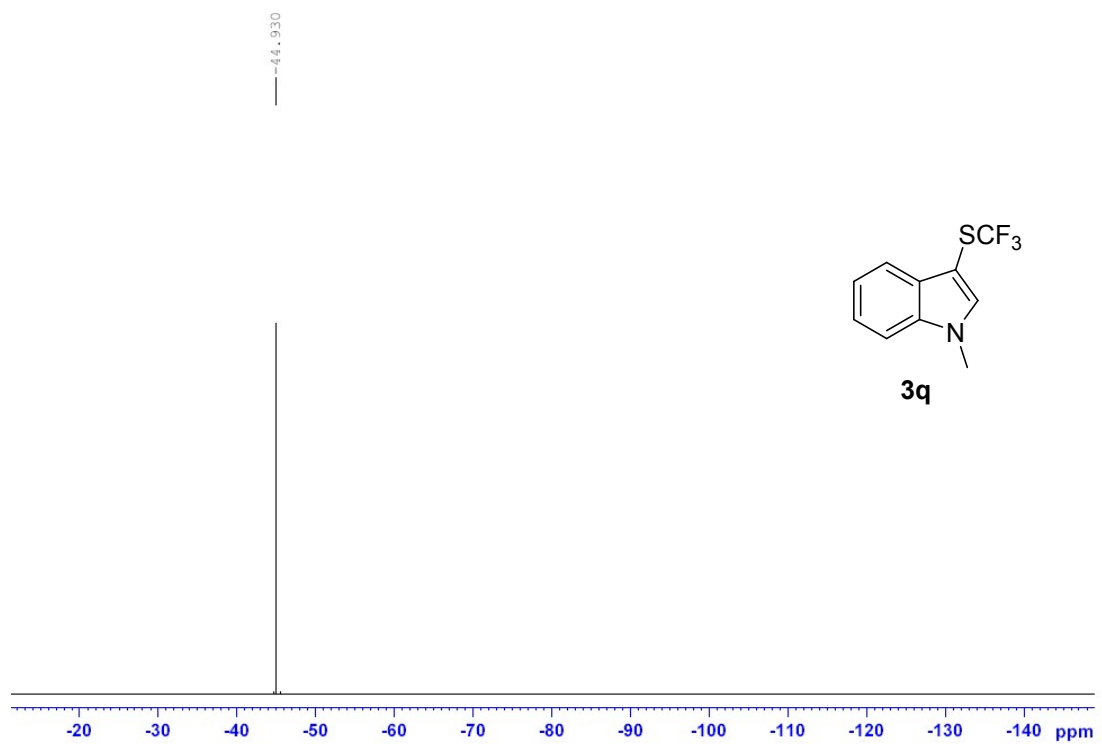

7.892  
7.891  
7.890  
7.873  
7.869  
7.868  
7.850  
7.829  
7.809  
7.771  
7.753  
7.735  
7.734  
7.735  
7.727  
7.706

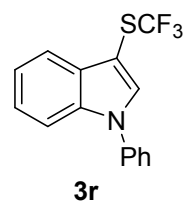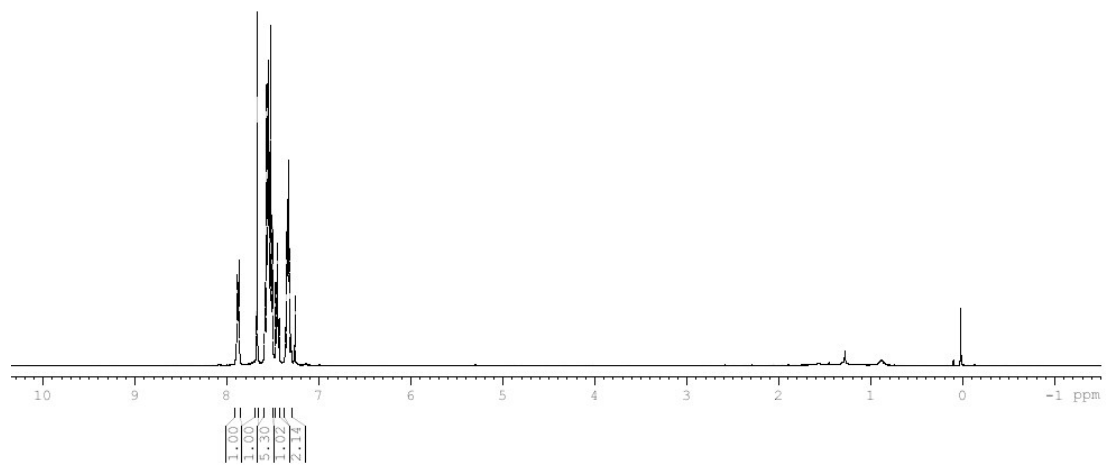

138.59  
136.74  
136.05  
134.19  
131.10  
130.69  
129.97  
128.02  
127.82  
124.94  
124.80  
123.83  
122.21  
119.81  
111.24  
96.39  
96.37  
77.48  
77.16  
76.84

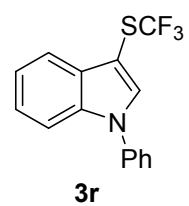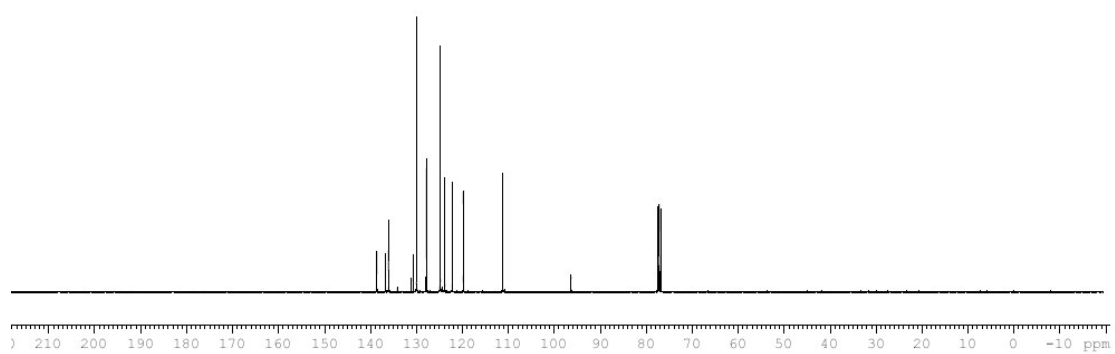

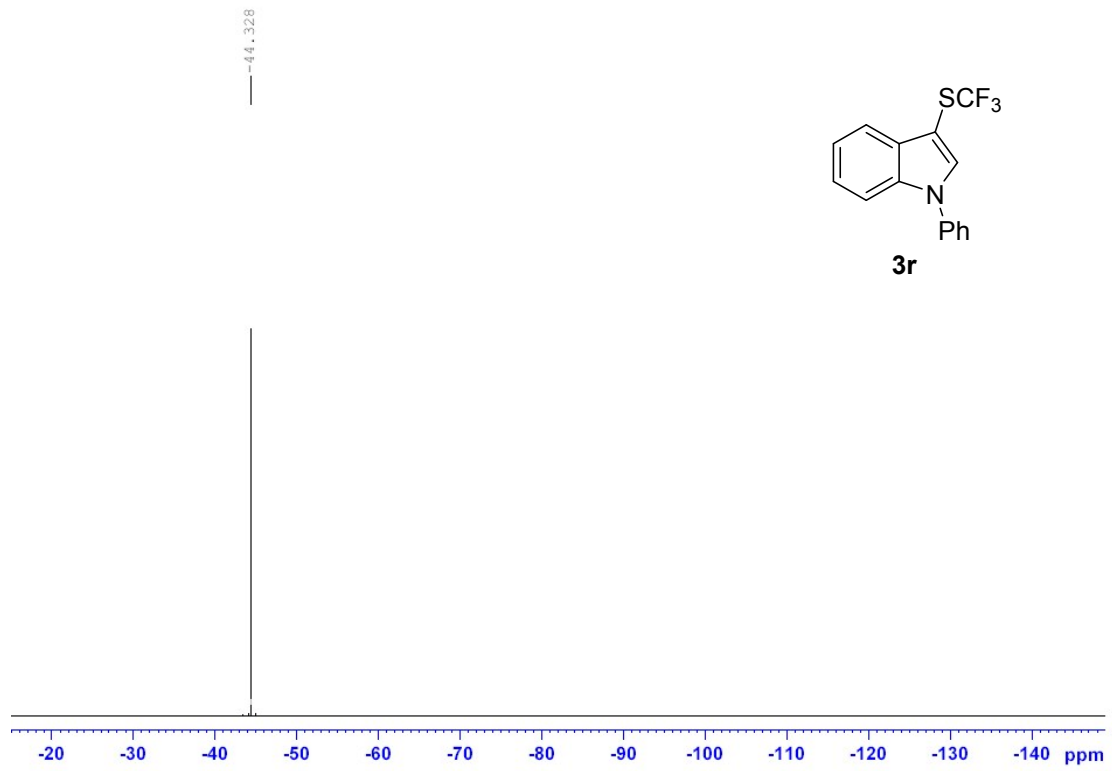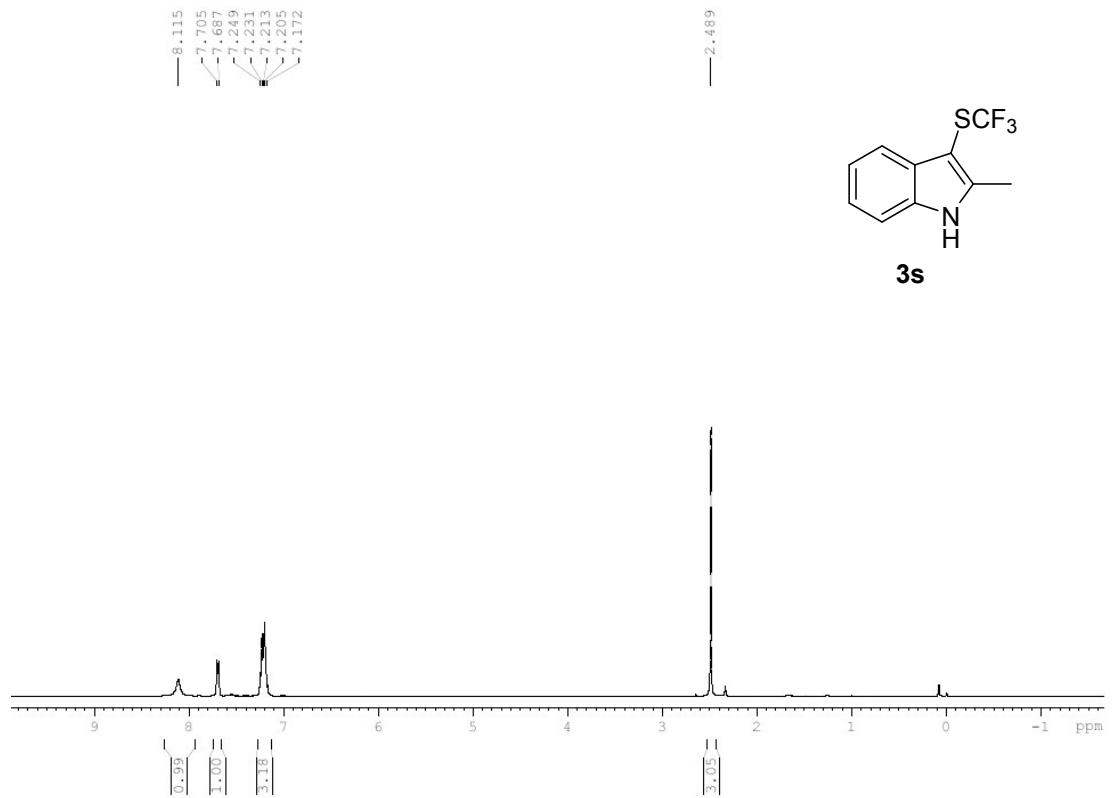

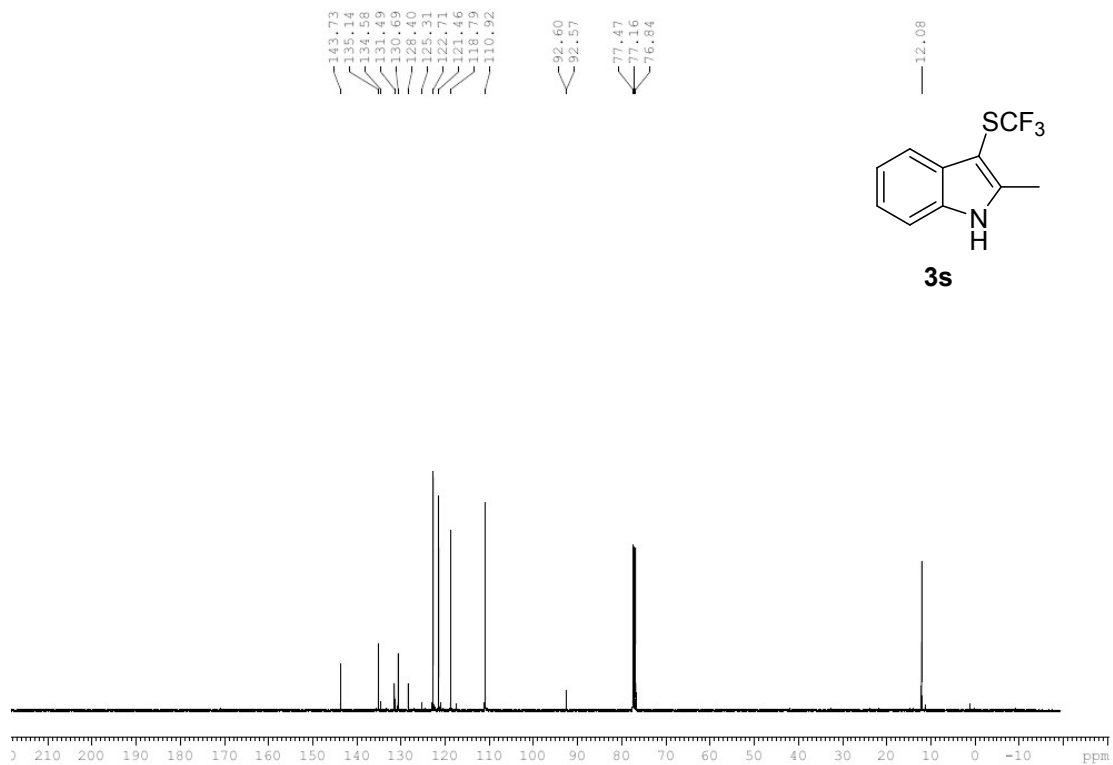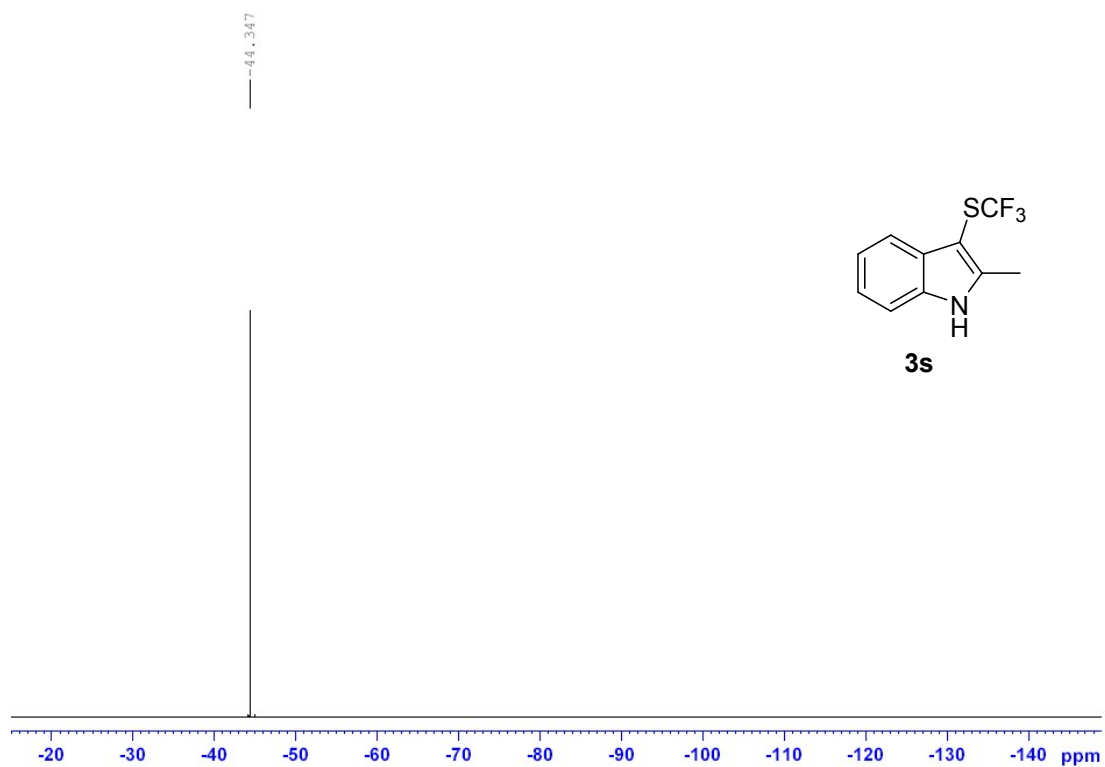

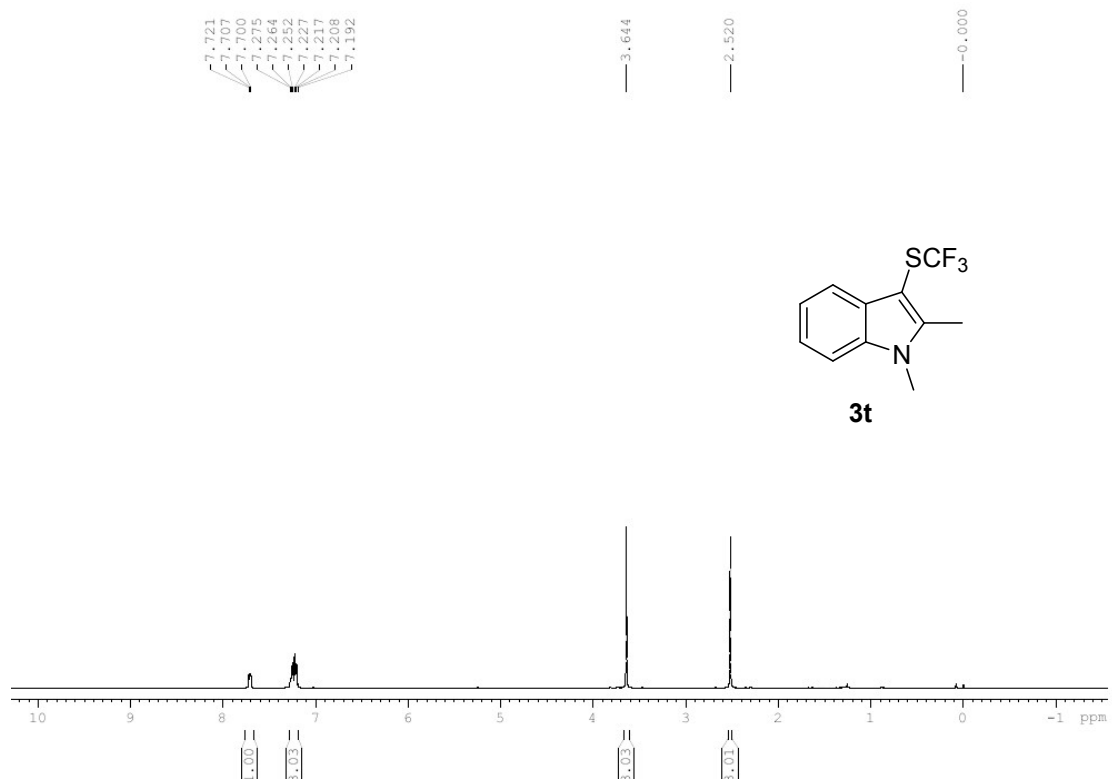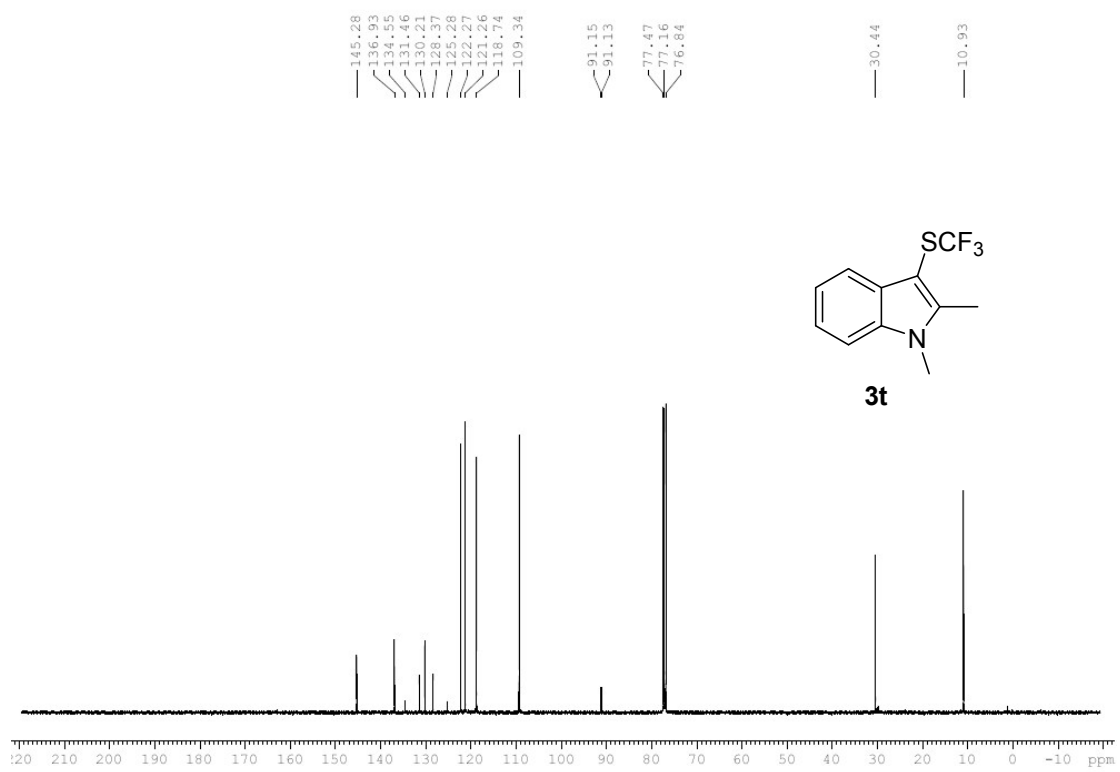

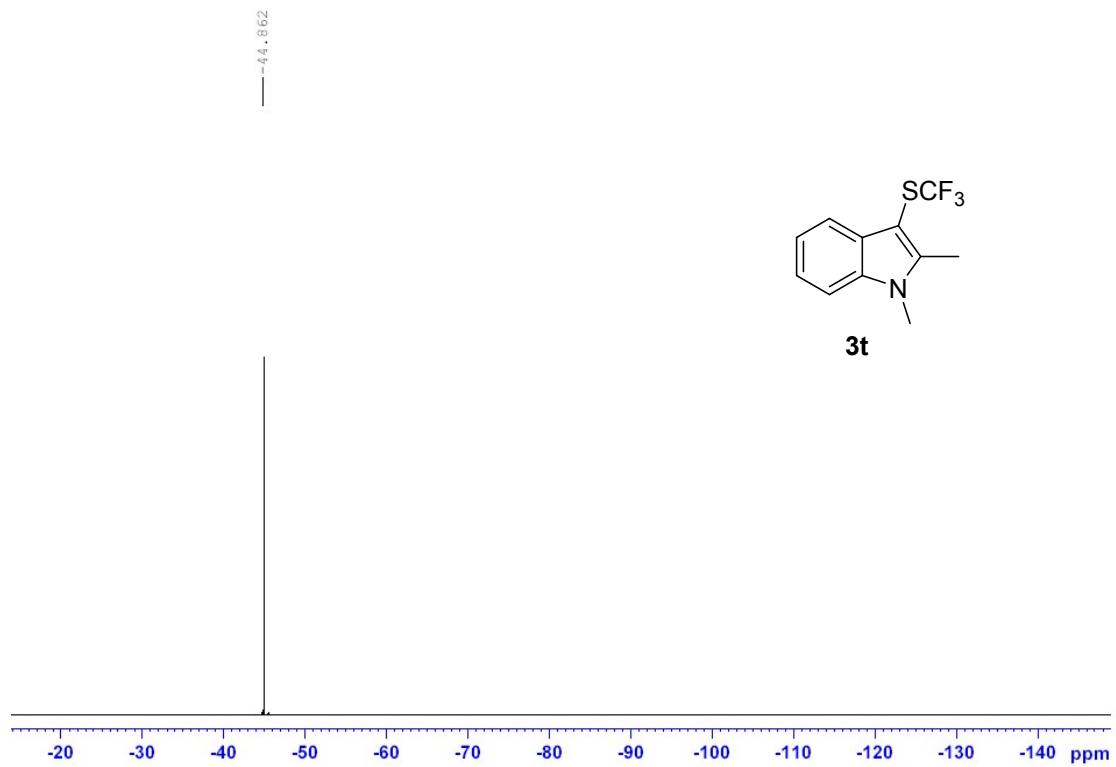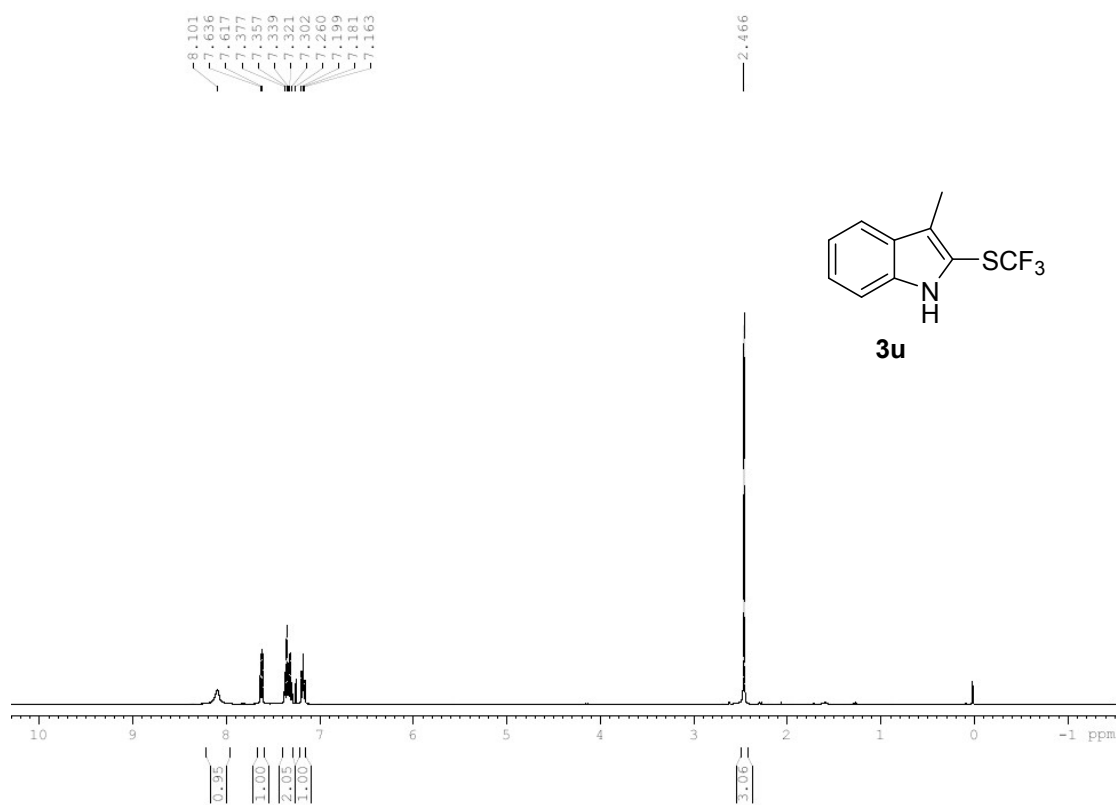

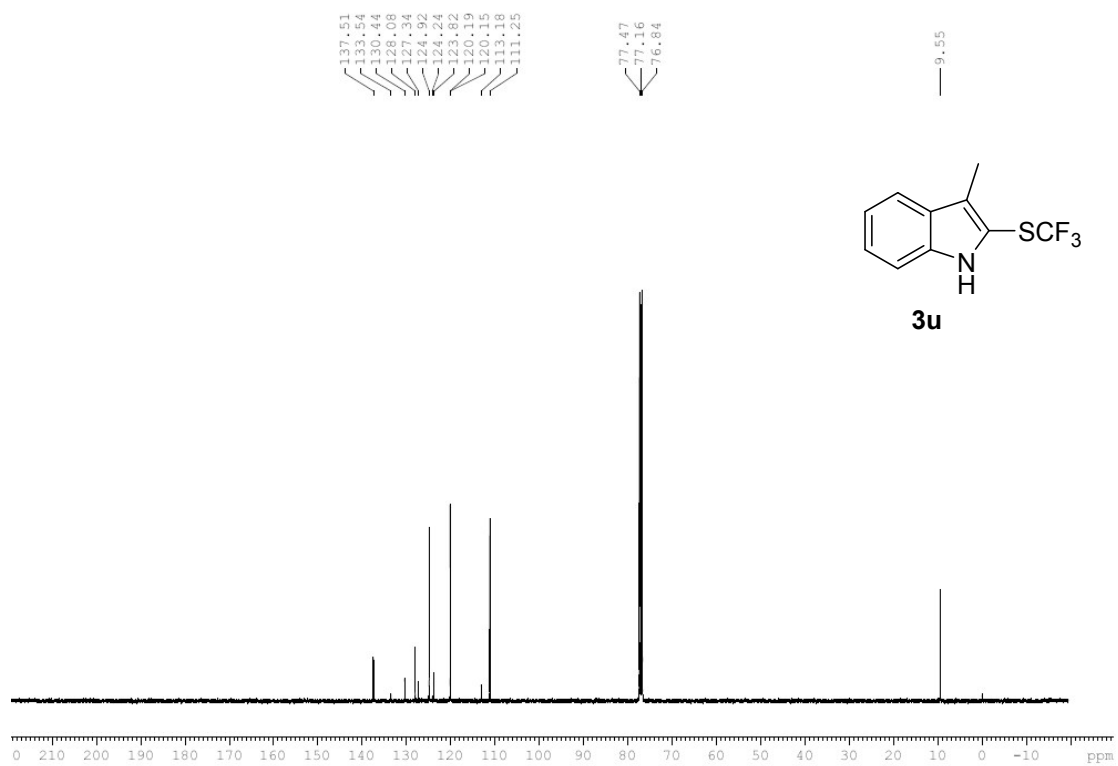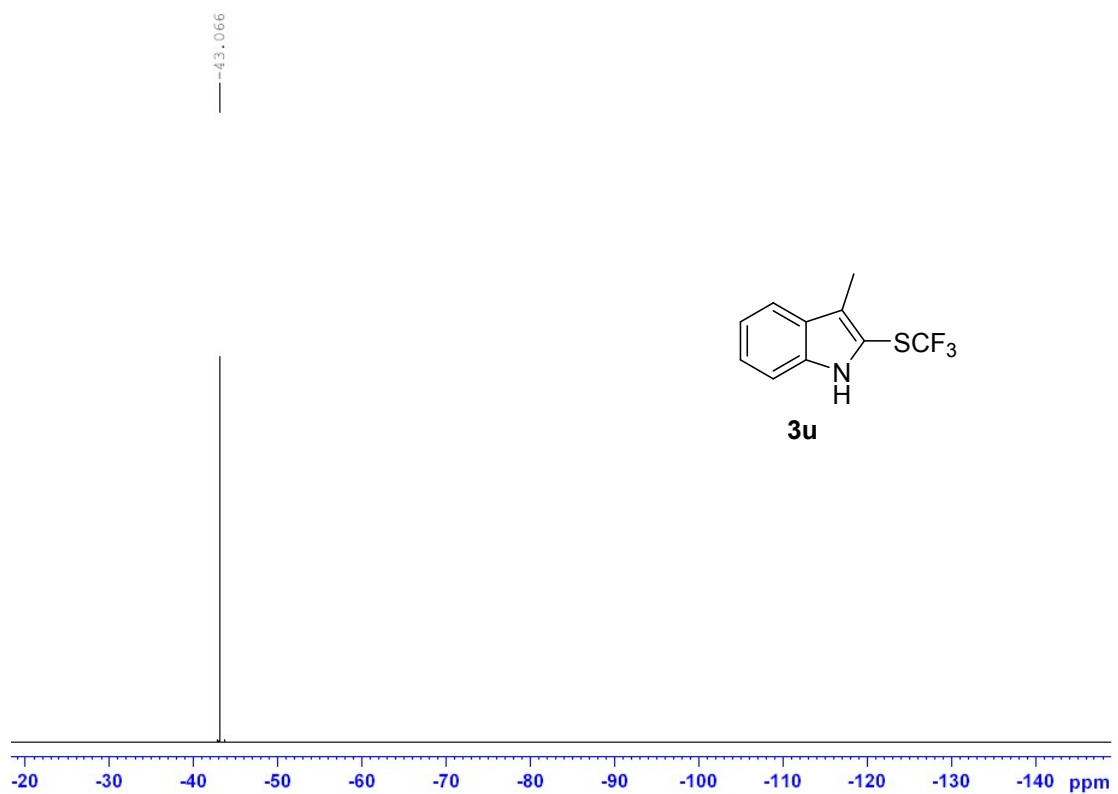



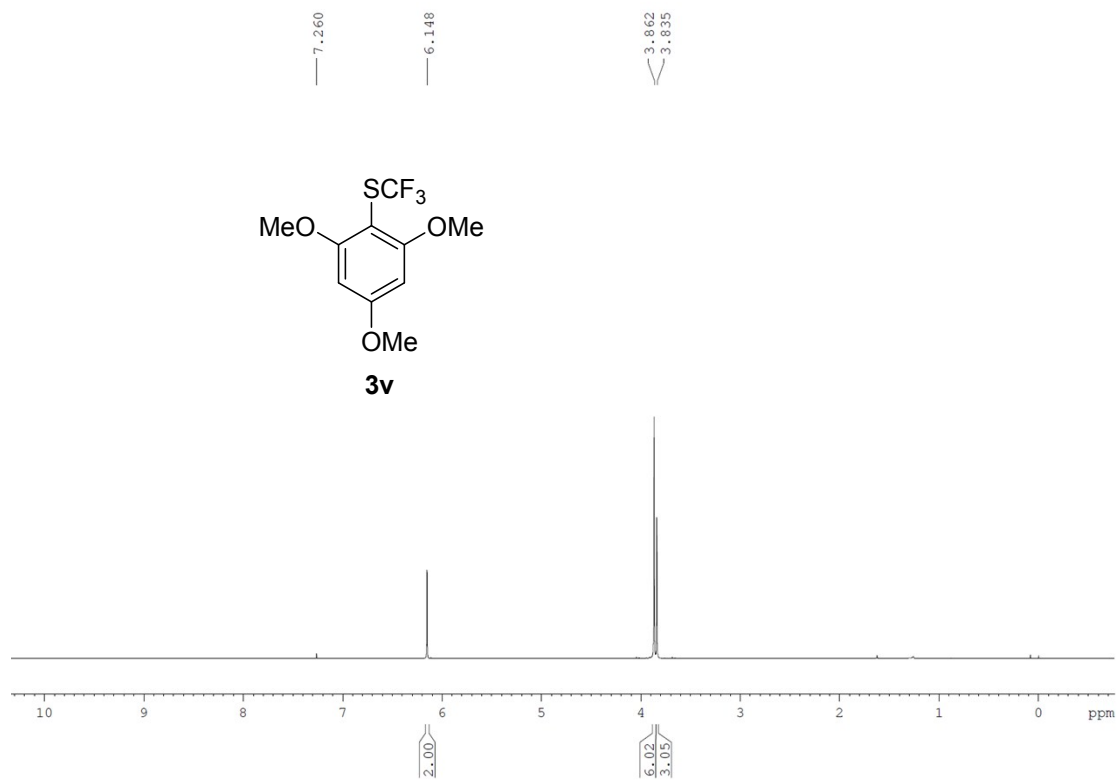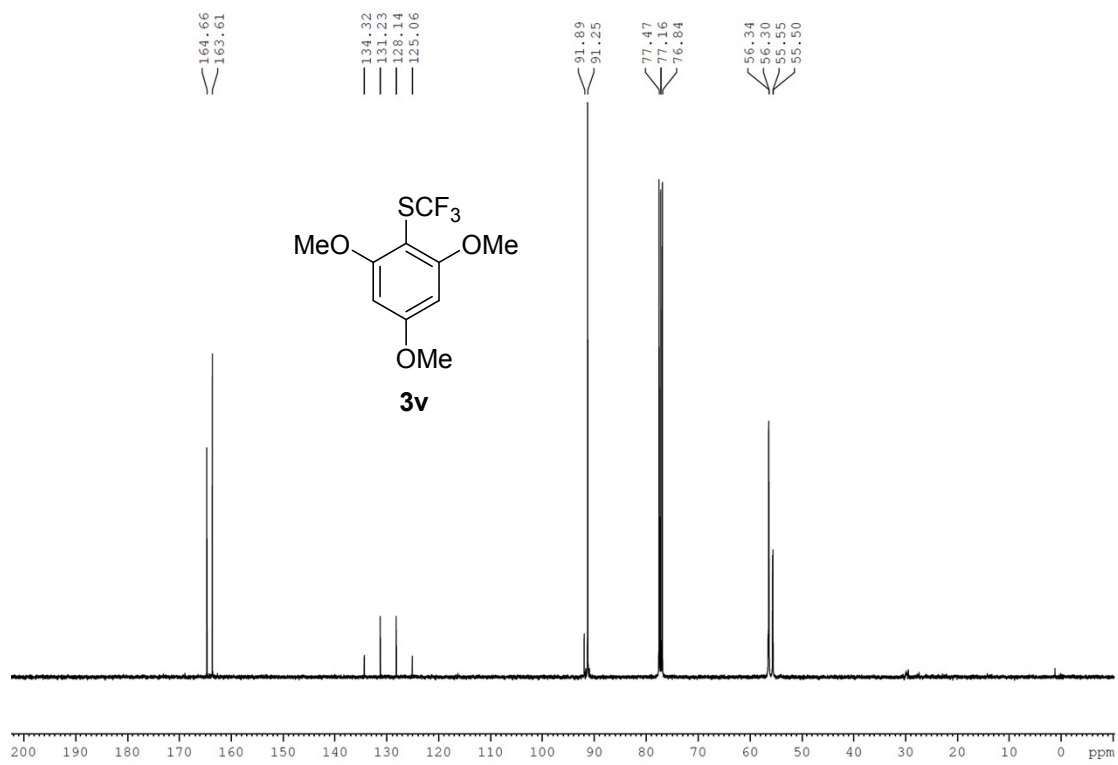

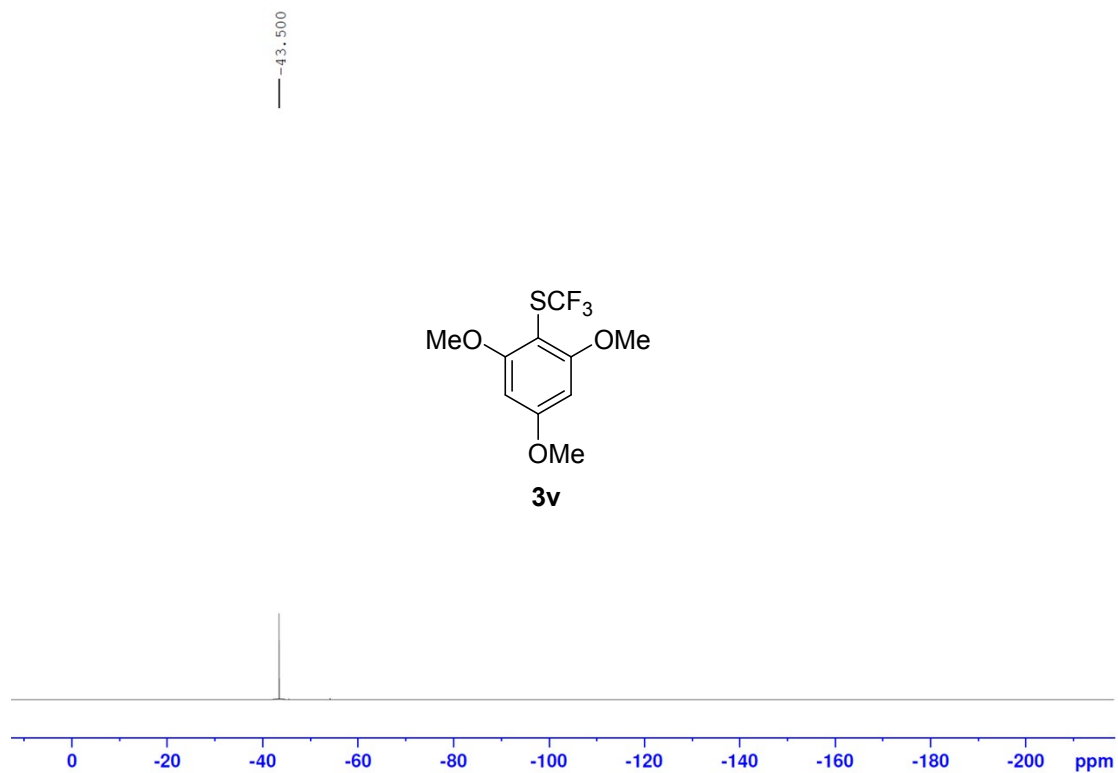

— 8.461    — 7.263    — 4.323    — 4.305    — 4.287    — 4.269    — 2.530    — 2.362    — 1.377    — 1.359    — 1.341

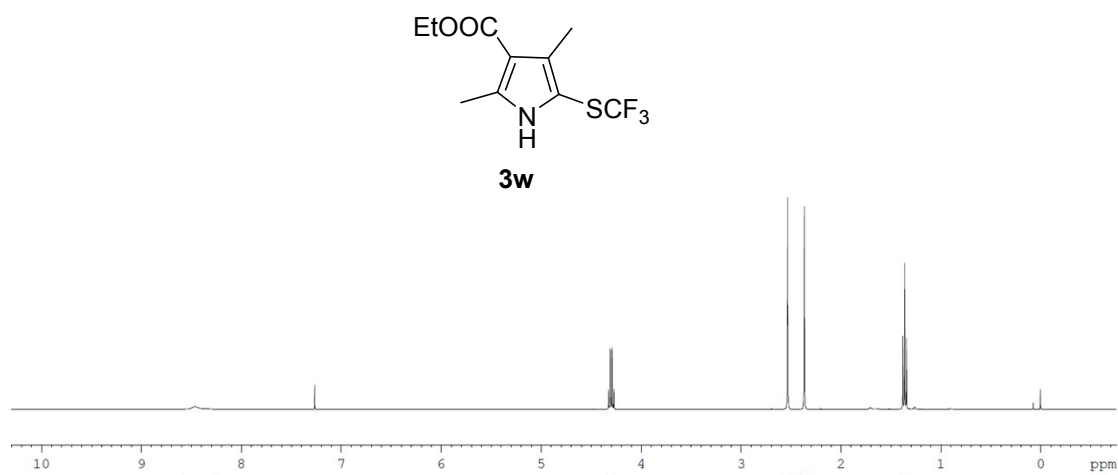

— 0.91    — 2.00    — 3.00    — 3.00    — 3.00

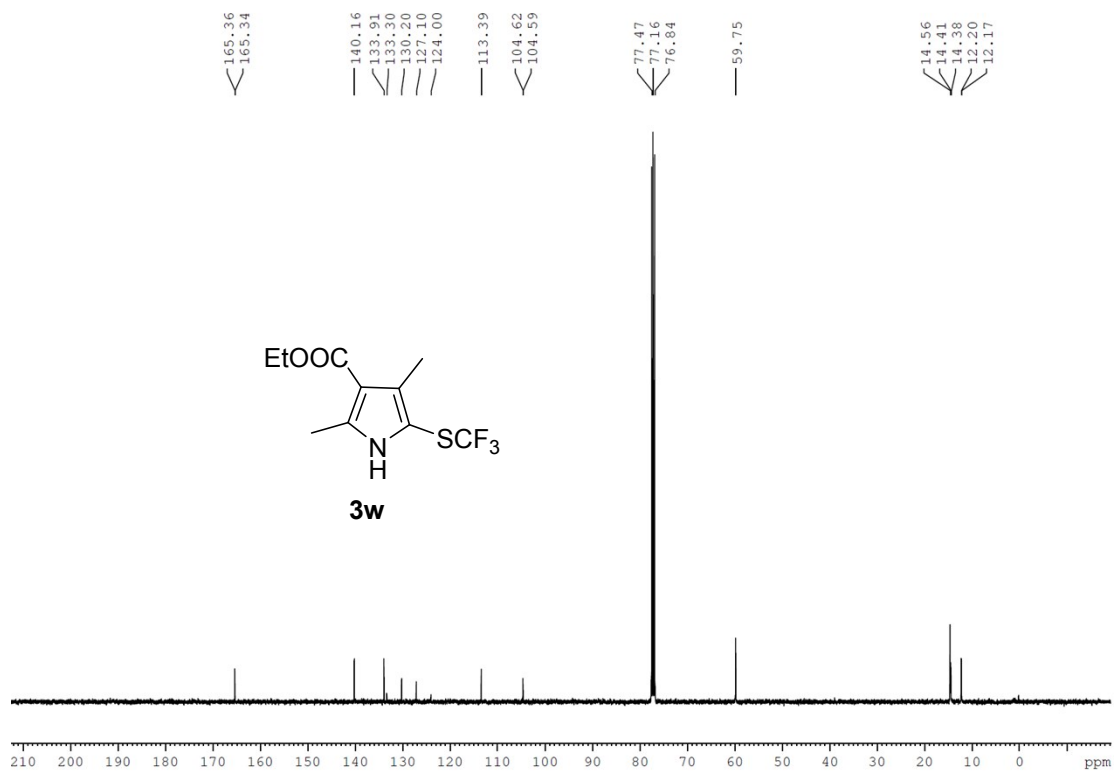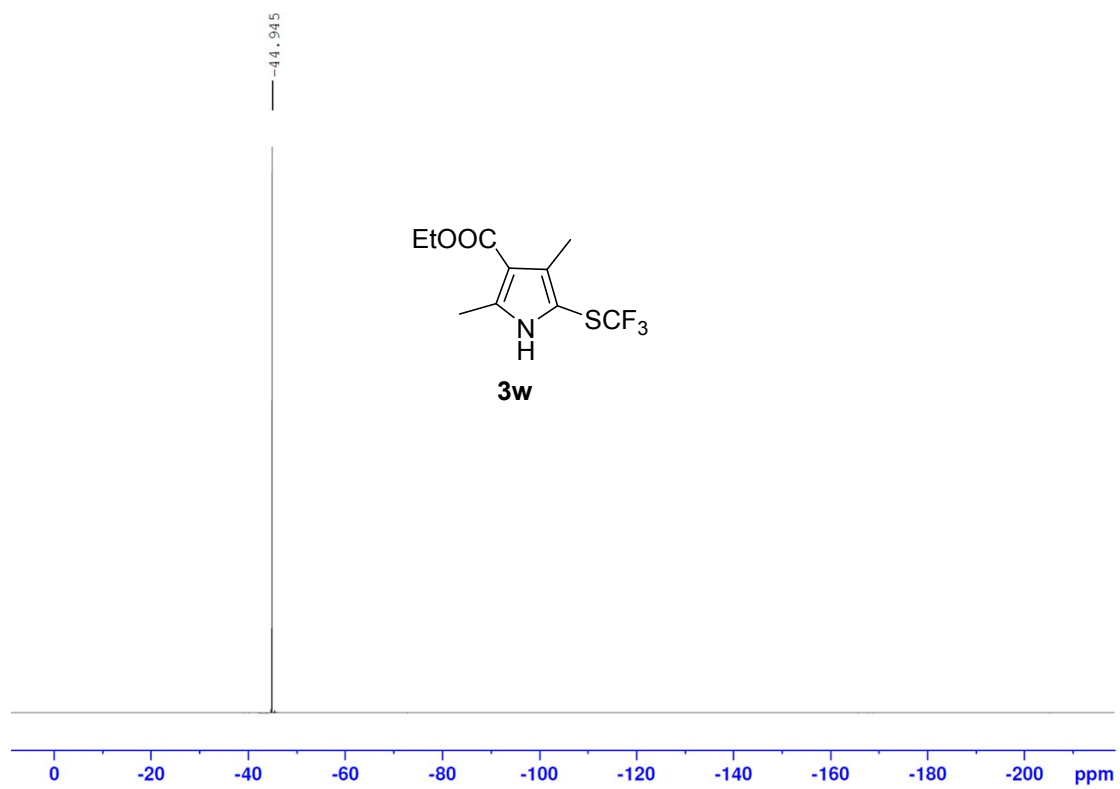

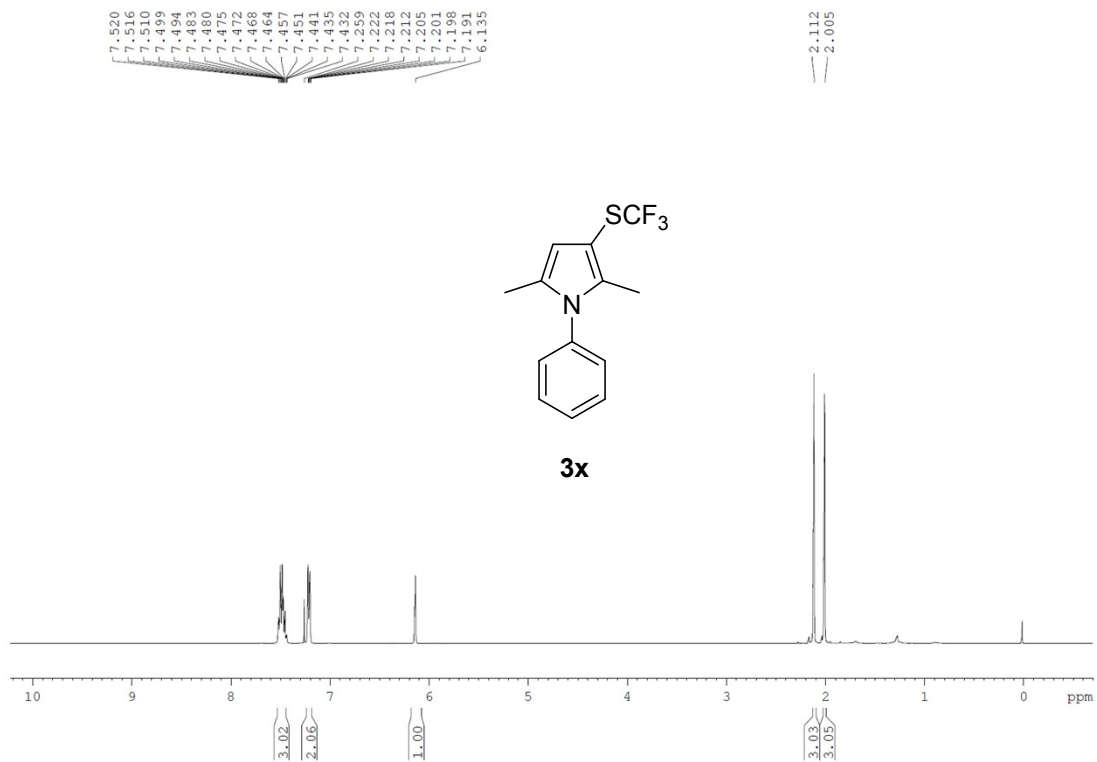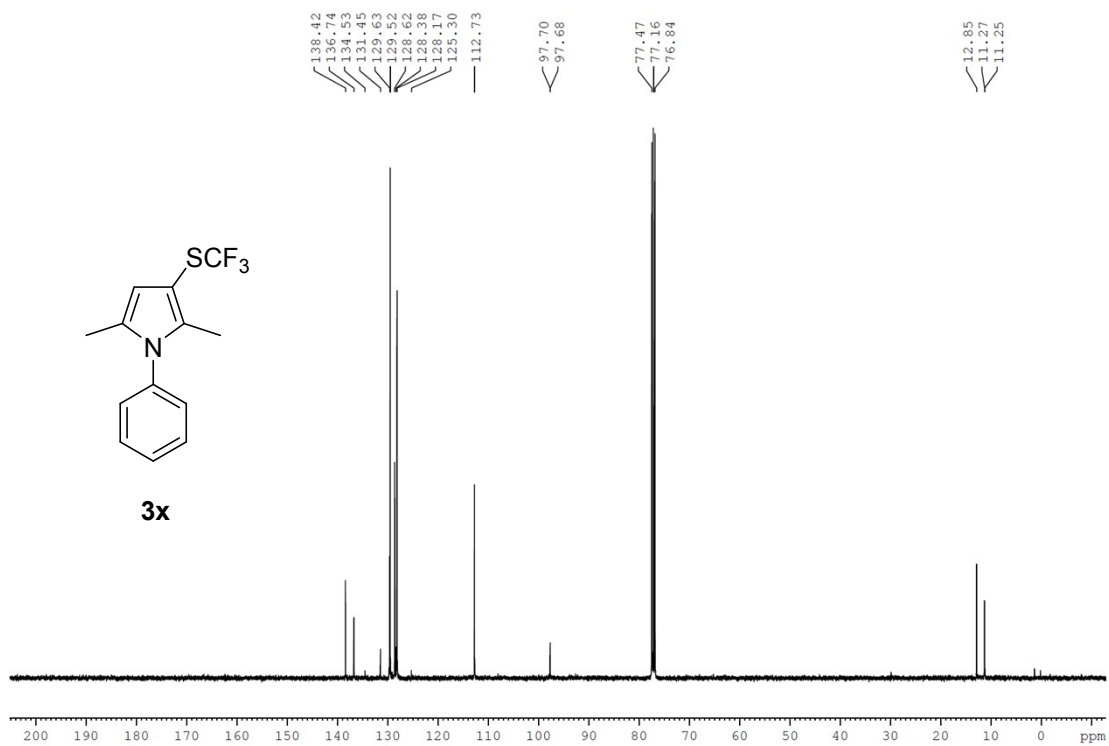

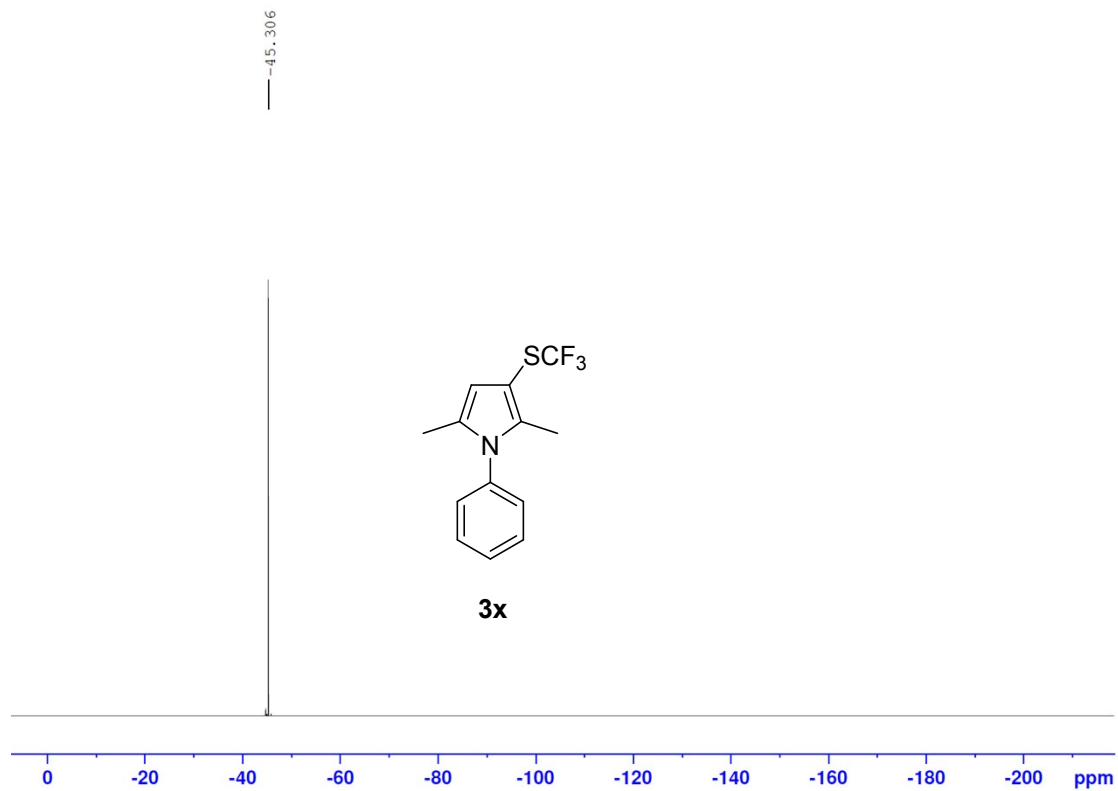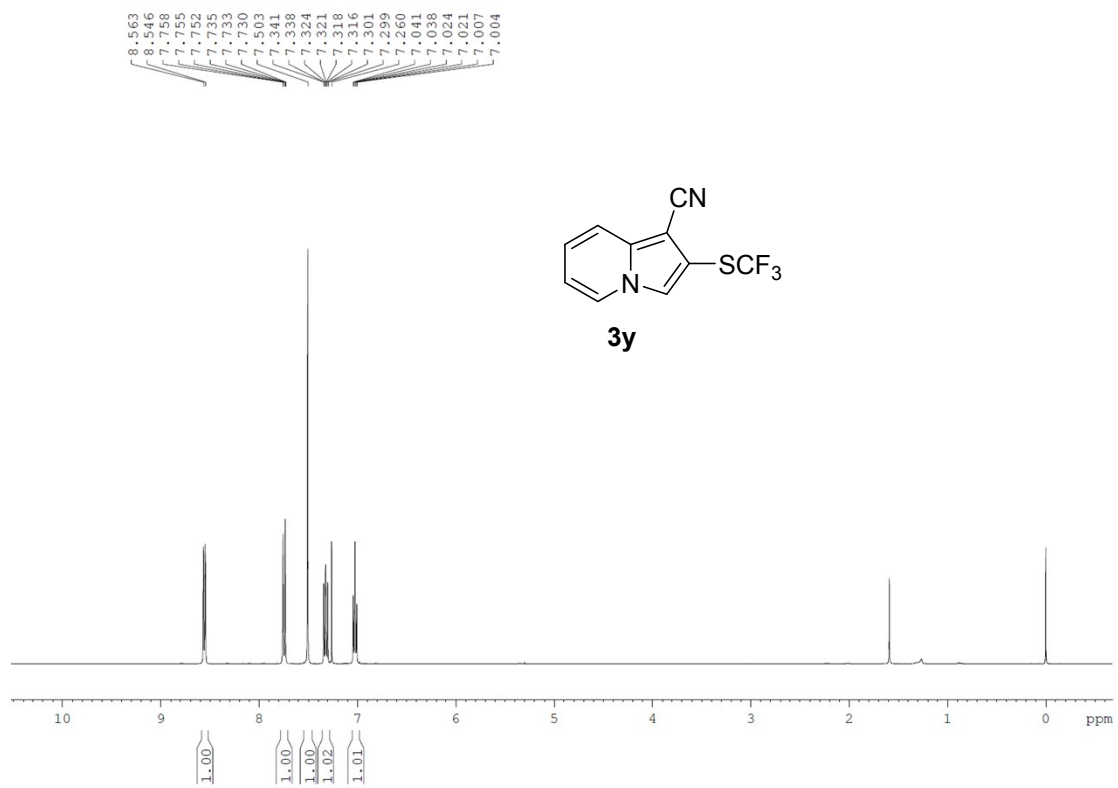

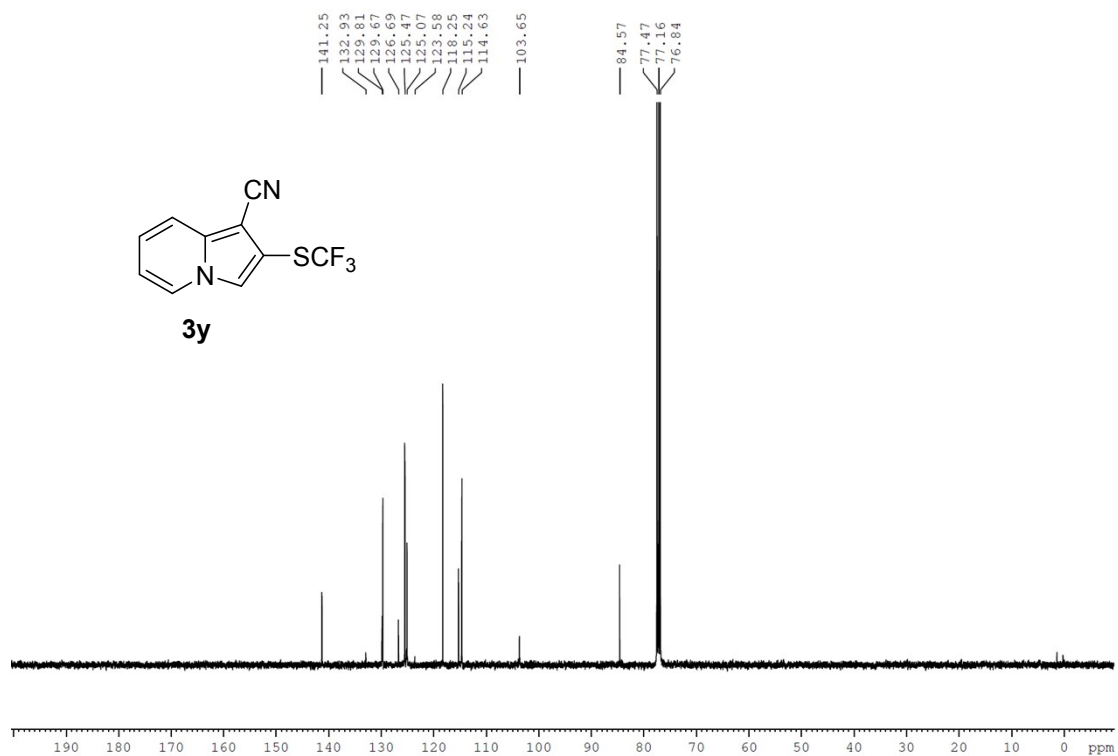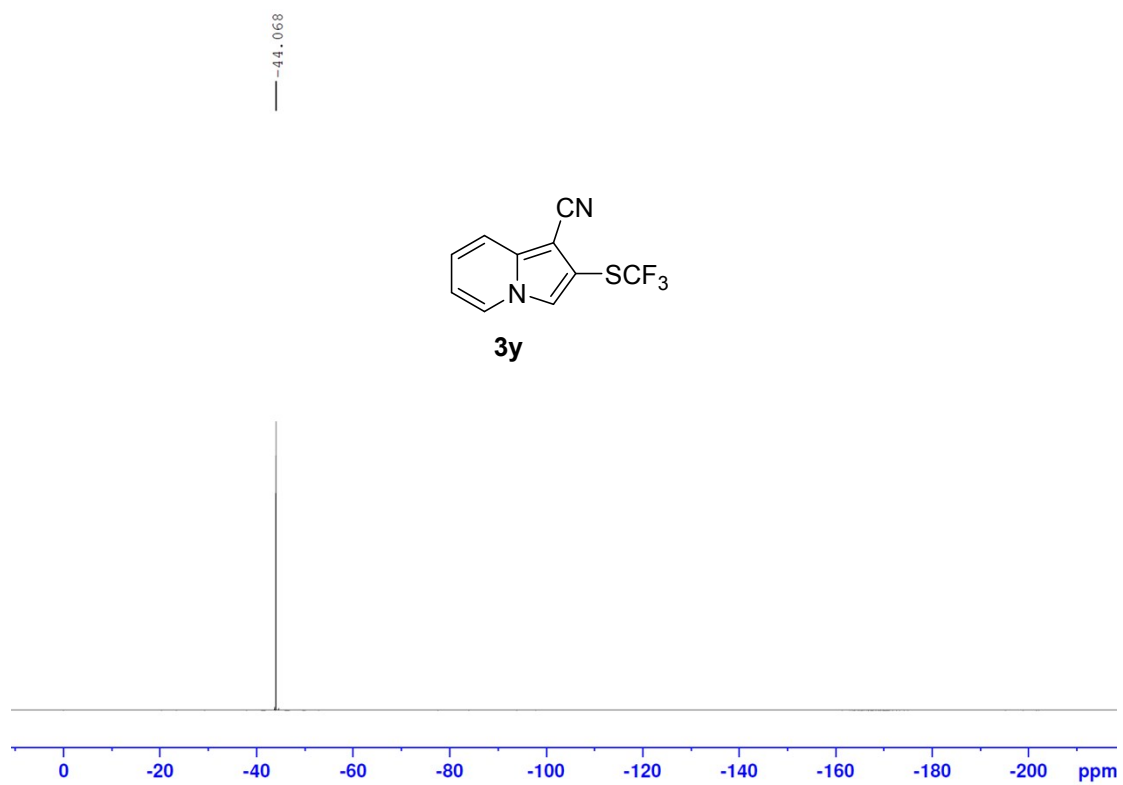

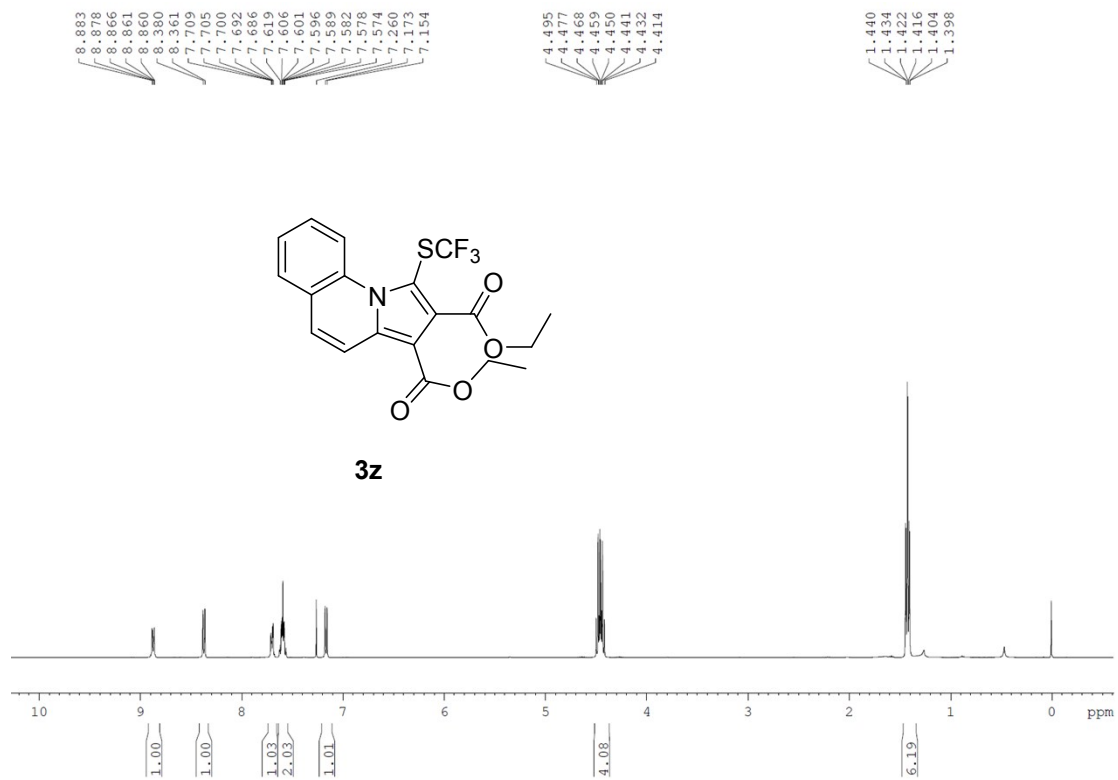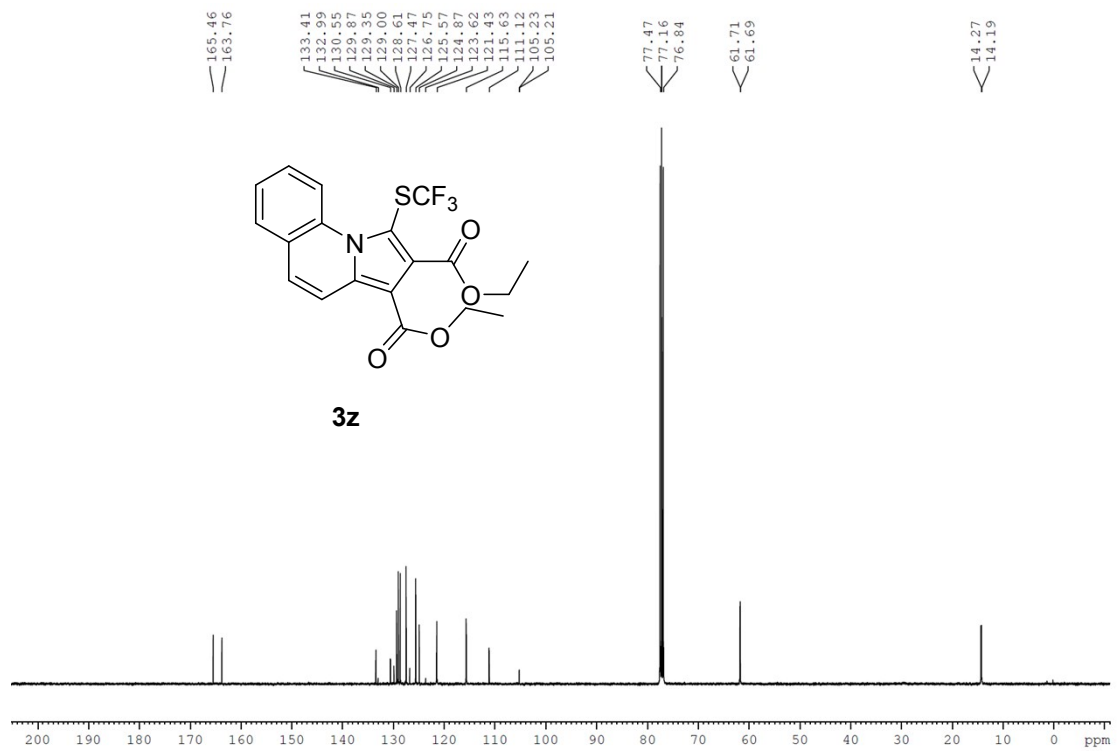

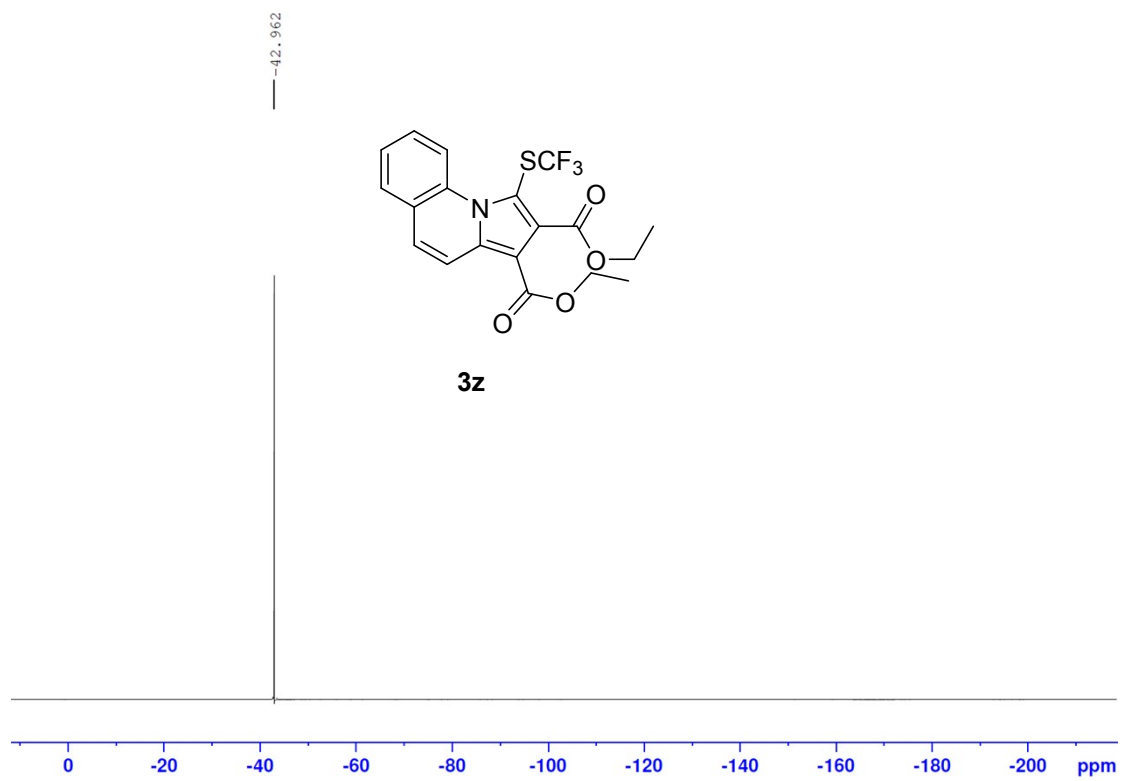

Supplement: c8qo00779a1.pdf [file c8qo00779a1.pdf]
